# Supplementary material for: Effectiveness and cost-effectiveness of personalised dietary advice aiming at increasing protein intake on physical functioning in community-dwelling older adults with lower habitual protein intake: rationale and design of the PROMISS randomised controlled trial
Source: PubMed Central journal article supplement (PMC7682452; doi:10.1136/bmjopen-2020-040637), 2020-11-20
Supplement: bmjopen-2020-040637.draft_revisions.pdf [file bmjopen-2020-040637.draft_revisions.pdf]

# BMJ Open

BMJ Open is committed to open peer review. As part of this commitment we make the peer review history of every article we publish publicly available.

When an article is published we post the peer reviewers' comments and the authors' responses online. We also post the versions of the paper that were used during peer review. These are the versions that the peer review comments apply to.

The versions of the paper that follow are the versions that were submitted during the peer review process. They are not the versions of record or the final published versions. They should not be cited or distributed as the published version of this manuscript.

BMJ Open is an open access journal and the full, final, typeset and author-corrected version of record of the manuscript is available on our site with no access controls, subscription charges or pay-per-view fees (<http://bmjopen.bmj.com>).

If you have any questions on BMJ Open's open peer review process please email [info.bmjopen@bmj.com](mailto:info.bmjopen@bmj.com)

# BMJ Open

**Effectiveness and cost-effectiveness of personalized dietary advice aiming at increasing protein intake on physical functioning in community-dwelling older adults with lower habitual protein intake: rationale and design of the PROMISS trial**

|                               |                                                                                                                                                                                                                                                                                                                                                                                                                                                                                                                                                                                                                                                                                                                                                                         |
|-------------------------------|-------------------------------------------------------------------------------------------------------------------------------------------------------------------------------------------------------------------------------------------------------------------------------------------------------------------------------------------------------------------------------------------------------------------------------------------------------------------------------------------------------------------------------------------------------------------------------------------------------------------------------------------------------------------------------------------------------------------------------------------------------------------------|
| Journal:                      | <i>BMJ Open</i>                                                                                                                                                                                                                                                                                                                                                                                                                                                                                                                                                                                                                                                                                                                                                         |
| Manuscript ID                 | bmjopen-2020-040637                                                                                                                                                                                                                                                                                                                                                                                                                                                                                                                                                                                                                                                                                                                                                     |
| Article Type:                 | Protocol                                                                                                                                                                                                                                                                                                                                                                                                                                                                                                                                                                                                                                                                                                                                                                |
| Date Submitted by the Author: | 18-May-2020                                                                                                                                                                                                                                                                                                                                                                                                                                                                                                                                                                                                                                                                                                                                                             |
| Complete List of Authors:     | Reinders, Ilse; Vrije Universiteit Amsterdam, Wijnhoven, Hanneke; Vrije Universiteit Amsterdam<br>Jyvakorpi, S; University of Helsinki<br>Suominen, Merja; University of Helsinki<br>Niskanen, Riikka; University of Helsinki<br>Bosmans, J; Vrije Universiteit Amsterdam<br>Brouwer, Ingeborg; Vrije Universiteit Amsterdam<br>Fluitman, Kristien; Amsterdam UMC; University of Gothenburg<br>Klein, Michel; Vrije Universiteit Amsterdam<br>Kuijper, Lothar; Vrije Universiteit Amsterdam<br>van der Lubbe, Laura; Vrije Universiteit Amsterdam<br>Olthof, Margreet R.; Vrije Universiteit Amsterdam<br>Pitkala, Kaisu H.; University of Helsinki<br>van der Pols-Vijlbrief, Rachel ; Vrije Universiteit Amsterdam<br>Visser, Marjolein; Vrije Universiteit Amsterdam |
| Keywords:                     | GERIATRIC MEDICINE, NUTRITION & DIETETICS, PUBLIC HEALTH                                                                                                                                                                                                                                                                                                                                                                                                                                                                                                                                                                                                                                                                                                                |
|                               |                                                                                                                                                                                                                                                                                                                                                                                                                                                                                                                                                                                                                                                                                                                                                                         |

SCHOLARONE™  
Manuscripts

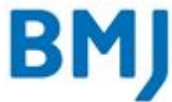

I, the Submitting Author has the right to grant and does grant on behalf of all authors of the Work (as defined in the below author licence), an exclusive licence and/or a non-exclusive licence for contributions from authors who are: i) UK Crown employees; ii) where BMJ has agreed a CC-BY licence shall apply, and/or iii) in accordance with the terms applicable for US Federal Government officers or employees acting as part of their official duties; on a worldwide, perpetual, irrevocable, royalty-free basis to BMJ Publishing Group Ltd ("BMJ") its licensees and where the relevant Journal is co-owned by BMJ to the co-owners of the Journal, to publish the Work in this journal and any other BMJ products and to exploit all rights, as set out in our [licence](#).

The Submitting Author accepts and understands that any supply made under these terms is made by BMJ to the Submitting Author unless you are acting as an employee on behalf of your employer or a postgraduate student of an affiliated institution which is paying any applicable article publishing charge ("APC") for Open Access articles. Where the Submitting Author wishes to make the Work available on an Open Access basis (and intends to pay the relevant APC), the terms of reuse of such Open Access shall be governed by a Creative Commons licence – details of these licences and which [Creative Commons](#) licence will apply to this Work are set out in our licence referred to above.

Other than as permitted in any relevant BMJ Author's Self Archiving Policies, I confirm this Work has not been accepted for publication elsewhere, is not being considered for publication elsewhere and does not duplicate material already published. I confirm all authors consent to publication of this Work and authorise the granting of this licence.

1  
2  
3 1 **Effectiveness and cost-effectiveness of personalized dietary advice aiming at increasing**  
4  
5 2 **protein intake on physical functioning in community-dwelling older adults with lower**  
6  
7 3 **habitual protein intake: rationale and design of the PROMISS trial**  
8  
9 4

10  
11  
12 5 **Ilse Reinders<sup>1</sup>, Hanneke A.H. Wijnhoven<sup>1</sup>, Satu K. Jyväkorpi<sup>2</sup>, Merja H. Suominen<sup>2</sup>,**  
13  
14 6 **Riikka Niskanen<sup>2</sup>, Judith E. Bosmans<sup>1</sup>, Ingeborg A. Brouwer<sup>1</sup>, Kristien S. Fluitman<sup>3,4</sup>,**  
15  
16 7 **Michel C.A. Klein<sup>5</sup>, Lothar D. Kuijper<sup>1</sup>, Laura M. van der Lubbe<sup>5</sup>, Margreet R. Olthof<sup>1</sup>,**  
17  
18 8 **Kaisu H. Pitkälä<sup>2</sup>, Rachel Vijlbrief<sup>1</sup> and Marjolein Visser<sup>1</sup>.**  
19  
20  
21  
22 9

23  
24 10 <sup>1</sup>Department of Health Sciences, Faculty of Science, and the Amsterdam Public Health  
25  
26 11 research institute, Vrije Universiteit Amsterdam, The Netherlands; <sup>2</sup>University of Helsinki,  
27  
28 12 Department of General Practice and Primary Health Care, and Helsinki University Central  
29  
30 13 Hospital, Unit of Primary Health Care, Finland; <sup>3</sup>Department of Internal Medicine,  
31  
32 14 Amsterdam UMC, Vrije Universiteit Amsterdam, Amsterdam Public Health research  
33  
34 15 institute, Amsterdam, The Netherlands; <sup>4</sup>Wallenburg Laboratory, Department of Molecular  
35  
36 16 and Clinical Medicine, Sahlgrenska Academy, University of Gothenburg, Gothenburg,  
37  
38 17 Sweden; <sup>5</sup>Department of Computer Science, Vrije Universiteit Amsterdam, Amsterdam, the  
39  
40 18 Netherlands.  
41  
42  
43  
44  
45  
46  
47  
48  
49  
50  
51  
52  
53  
54  
55  
56  
57  
58  
59  
60

20 Corresponding author:

21 Ilse Reinders

22 Vrije Universiteit Amsterdam

23 De Boelelaan 1105, kamer O-526

24 1081 HV Amsterdam

25 The Netherlands

1  
2  
3  
4  
5  
6  
7  
8  
9  
10  
11  
12  
13  
14  
15  
16  
17  
18  
19  
20  
21  
22  
23  
24  
25  
26  
27  
28  
29  
30  
31  
32  
33  
34  
35  
36  
37  
38  
39  
40  
41  
42  
43  
44  
45  
46  
47  
48  
49  
50  
51  
52  
53  
54  
55  
56  
57  
58  
59  
60

26 ilse.reinders@vu.nl

27 Tel: +31205982467

28

29 **Total word count: 7261**

For peer review only

1  
2  
3 **30 Abstract**  
4

5 **31 Background:** Short-term metabolic and observational studies suggest that protein intake  
6  
7  
8  
9  
10  
11  
12  
13  
14  
15  
16  
17  
18  
19  
20  
21  
22  
23  
24  
25  
26  
27  
28  
29  
30  
31  
32 above the recommended dietary allowance of 0.83 g/kg body weight (BW)/d may support  
33 preservation of lean body mass and physical function in old age, but evidence from RCTs is  
34 inconclusive.

35 **35 Methods:** The PROMISS trial examines effects of personalized dietary advice aiming at  
36 increasing protein intake with or without advice regarding timing of protein intake to close  
37 proximity of any usual physical activity, on change in physical functioning after 6 months  
38 among community-dwelling older adults ( $\geq 65$ y) with a habitual protein intake of  $< 1.0$  g/kg  
39 adjusted (a)BW/d. Participants (n=264) will be recruited in Finland and the Netherlands, and  
40 will be randomized into three groups; two intervention groups and one control group.  
41 Intervention group 1 (n=88) receives personalized dietary advice and protein enriched food  
42 products in order to increase their protein intake to at least 1.2 g/kg aBW/d. Intervention  
43 group 2 (n=88) receives the same advice as intervention group 1, and advice to consume 7.5-  
44 10 g protein through protein (en)rich(ed) foods within half an hour after performing any usual  
45 physical activity. The control group (n=88) receives no intervention. All participants will be  
46 invited to attend lectures not related to health. The primary outcome is 6-months change in  
47 physical functioning measured by change in walk time using a 400-m walk test. Secondary  
48 outcomes are: 6-months change in the Short Physical Performance Battery score, muscle  
49 strength, body composition, self-reported mobility limitations, quality of life, and incidence  
50 of frailty, sarcopenia and malnutrition. We also investigate cost-effectiveness by change in  
51 health care costs.

52 **52 Discussion:** The PROMISS trial will provide evidence whether increasing protein intake, and  
53 additionally optimizing timing of protein intake, has a positive effect on the course of  
54  
55  
56  
57  
58  
59  
60

1  
2  
3 54 physical functioning among community-dwelling older adults with a habitual protein intake  
4  
5 55 of < 1.0 g/kg aBW/d.  
6  
7  
8 56

9  
10 57 **Strengths and limitations of this study**

- 11  
12 58 • The effectiveness of advising to increase protein intake on 6-month change in  
13  
14 59 physical functioning will be investigated;  
15  
16  
17 60 • the combined benefit of increasing protein intake and timing of protein intake will  
18  
19 61 be investigated;  
20  
21  
22 62 • Only community-dwelling older adults with a habitual protein intake of < 1.0 g/kg  
23  
24 63 aBW/d will be included;  
25  
26 64 • The intervention is based on personalized dietary advice;  
27  
28  
29 65 • The biological value of the total protein intake will not be known.  
30  
31 66

32  
33 67 **Trial registration:** ClinicalTrials.gov. Number of identification: NCT03712306. Registered  
34  
35 68 19 October 2018,  
36  
37  
38 69 <https://clinicaltrials.gov/ct2/show/NCT03712306?cond=protein&cntry=NL&city=Amsterda>  
39  
40 70 [m&draw=2&rank=1](https://clinicaltrials.gov/ct2/show/NCT03712306?cond=protein&cntry=NL&city=Amsterdam&draw=2&rank=1)  
41  
42  
43 71

44  
45 72 **Keywords:** older adults, protein intake, physical functioning, RCT, malnutrition, protein  
46  
47 73 recommendation, 400 meter walk.  
48  
49  
50  
51  
52  
53  
54  
55  
56  
57  
58  
59  
60

## 74 **Background**

75 There is an ongoing debate on whether or not older adults should be recommended a protein  
76 intake above the current recommended daily allowance (RDA) established by the European  
77 Food Safety Authority (EFSA) of 0.83 g/kg body weight (BW)/d for adults (1). International  
78 panels of geriatricians, nutritional experts and scientists have proposed at least 1.0-1.2 g  
79 protein/kg BW/d for healthy older adults in order to maintain and regain muscle mass,  
80 strength and function (2, 3).

81 The proposed increase of the RDA for older adults is merely based on results from  
82 short term metabolic and epidemiological studies. Several metabolic studies showed that  
83 older adults ( $\geq 65$  y) have a lower muscle protein synthesis (MPS) following protein intake  
84 compared to younger adults (4-6), and that higher protein intake enhances MPS in older  
85 adults when compared to lower protein intake (1.2 g/kg BW/d vs. 0.8 g/kg BW/d (7), or  $\geq 30$   
86 g/d vs. 15 g/d (8)). In addition, the anabolic threshold (i.e. optimal dose of dietary protein in a  
87 meal that stimulates MPS) is 70% higher in older compared to younger adults (5).  
88 Epidemiological studies have shown that higher dietary protein intake in older adults, defined  
89 as  $> 0.9$  g/kg BW/d (9) or  $> 1.0$  g/kg BW/d (10-12) is associated with lower risk of weight  
90 loss (11), better disability trajectories (12), less loss of lean mass (9), or lower risk of  
91 developing functional impairments (10).

92 Despite the evidence from metabolic and epidemiological studies, causal evidence to  
93 support beneficial effects of protein intake at or above 1.0 g/kg BW/d based on randomized  
94 controlled trials (RCTs) is not conclusive. One systematic review showed no beneficial effect  
95 of increasing protein intake on lean body mass, muscle cross-sectional area, muscle strength,  
96 or physical performance (13). Of the 36 studies included in the systematic review, 26 studies  
97 presented mean habitual protein intake of the study participants which ranged between 0.78  
98 and 1.5 g/kg BW/d, with only one study below the protein RDA of 0.8 g/kg BW/d (13). The



1  
2  
3 99 relatively high mean habitual protein intake may explain the absence of a beneficial effect of  
4  
5 100 additional protein. Another explanation may be that the amount of protein provided might not  
6  
7 101 have been sufficient to augment MPS. I.e. a protein intake of 25 – 30 g is required to  
8  
9  
10 102 stimulate MPS and maintain muscle mass (14, 15), though the amounts provided varied  
11  
12 103 between 10 g/d (3d/wk) and total intake of 125 g/day or were not reported. Of the trials  
13  
14 104 published after the systematic review, Park et al. showed that intake of 1.5 g/kg BW/d for 12  
15  
16 105 weeks resulted in higher muscle mass and improved gait speed compared to intake of 0.8  
17  
18 106 g/kg BW/d in undernourished pre-frail and frail older adults (16). Ten Haaf et al. showed a  
19  
20 107 positive effect of increasing protein intake for 12 weeks on lean body mass in active older  
21  
22 108 adults with a habitual protein intake of < 1.0 g/kg BW/d (17). Beelen et al. found no effects  
23  
24 109 of protein supplementation on physical performance among older adults after hospital  
25  
26 110 discharge (18), however, baseline protein intake was already 1.0 g/kg BW/d in the control  
27  
28 111 group and 1.5 g/kg BW/d in the intervention group. Finally, Bhasin et al. showed no  
29  
30 112 beneficial effects other than a decrease in fat mass after a controlled diet with 1.3 g/kg BW/d  
31  
32 113 of protein for 6 months compared to a control diet consisting of 0.8 g protein /kg BW/d (19)  
33  
34 114 among functionally limited community-dwelling men aged  $\geq 65$  years. However, mean BMI  
35  
36 115 of the participants was quite high (30.3 kg/m<sup>2</sup>), which may have resulted in an overestimation  
37  
38 116 of baseline protein requirements. Based on inconsistent findings, more RCTs in older adults  
39  
40 117 with lower habitual protein intake are needed to determine the potential effect of increasing  
41  
42 118 protein intake on physical functioning outcomes.

43  
44  
45 119 Previous studies among older adults showed that protein supplementation in  
46  
47 120 combination with resistance exercise has more beneficial effects on body composition,  
48  
49 121 muscle strength and physical function compared to resistance exercise alone (20-26). The  
50  
51 122 underlying hypothesis is that protein supplementation augments the adaptive response of  
52  
53 123 skeletal muscle to resistance exercise. In addition, there is evidence that timing of protein  
54  
55  
56  
57  
58  
59  
60

1  
2  
3 124 intake in close proximity of physical activity stimulated MPS to greater extent than when  
4  
5 125 timed at other hours during the day (27). To our knowledge, there are no RCTs investigating  
6  
7 126 the effect of timing protein intake in in close proximity of physical activities on physical  
8  
9  
10 127 functioning.

11  
12 128 The Prevention Of Malnutrition In Senior Subjects in the EU (PROMISS) trial is  
13  
14 129 designed to fill in some of the current knowledge gaps on the optimal amount of dietary  
15  
16 130 protein in older community dwelling adults and timing of protein intake in relation to  
17  
18 131 physical activity. Its primary objective is to examine the effectiveness of personalized dietary  
19  
20 132 advice aiming at increasing protein intake to at least 1.2 g/kg adjusted (a)BW/d on change in  
21  
22 133 physical functioning after 6 months measured by change in walk time using a 400-m walk  
23  
24 134 test among community-dwelling older adults with a habitual protein intake of < 1.0 g/kg  
25  
26 135 aBW/d. Additionally, it examines the combined effect of personalized dietary advice aiming  
27  
28 136 at increasing protein intake to at least 1.2 g/kg aBW/d and advice aiming at optimizing the  
29  
30 137 timing of protein intake in close proximity of any usual physical activity. The secondary  
31  
32 138 objectives are to examine the effectiveness of personalized dietary advice aiming at  
33  
34 139 increasing protein intake to at least 1.2 g/kg adjusted on 6-month changes in physical  
35  
36 140 functioning measured by the Short Physical Performance Battery (SPPB) score, muscle  
37  
38 141 strength, body composition, self-reported mobility limitations, quality of life, incidence of  
39  
40 142 frailty, incidence of sarcopenia, and incidence of malnutrition and change in health care costs.

41  
42 143 In three ancillary studies the following additional objectives are addressed; 1) the  
43  
44 144 effect of using persuasive technology on adherence to personalized dietary advice aiming at  
45  
46 145 increasing protein to at least 1.2 g/kg aBW/d, 2) the effect of personalized dietary advice  
47  
48 146 aiming at increasing protein intake to at least 1.2 g/kg aBW/d on the oral and gut microbiota  
49  
50 147 composition, and 3) the effect of personalized dietary advice aiming at increasing protein  
51  
52  
53  
54  
55  
56  
57  
58  
59  
60

1  
2  
3 148 intake to at least 1.2 g/kg aBW/d on central neural responses to food-cues in brain areas of  
4  
5 149 interest.

6  
7  
8 150

9  
10 151 **Methods/Design**

11  
12 152 *Study design*

13  
14 153 The PROMISS trial is a multicentre randomized controlled trial (ClinicalTrials.gov identifier:  
15  
16 NCT03712306) designed to examine the effectiveness of personalized dietary advice aiming  
17  
18 154 at increasing protein intake and advice on optimizing the timing of protein intake in close  
19  
20 155 proximity of any usual physical activity on change in physical functioning after 6 months.  
21  
22 156 Participants will be randomised into three groups: one control group (no intervention);  
23  
24 157 intervention group 1) receiving personalized dietary advice aiming at increasing protein  
25  
26 158 intake to at least 1.2 g/kg aBW/d; and intervention group 2) receiving personalized dietary  
27  
28 159 advice aiming at increasing protein intake to at least 1.2 g/kg aBW/d, including personalized  
29  
30 160 advice to optimize the consumption of protein in close proximity of any usual physical  
31  
32 161 activity.  
33  
34 162

35  
36  
37 163 Researchers, nutritionists, and statisticians are responsible to the design of the trial. Older  
38  
39 164 adults were not involved in the design or conduct of the research.

40  
41  
42 165

43  
44 166 *Eligibility criteria*

45  
46  
47 167 The eligibility criteria are proposed to include a study group of older adults (65+) with a  
48  
49 168 habitual protein intake < 1.0 g/kg aBW/d. Inclusion and exclusion criteria are listed in Table  
50  
51 169 1, and some are described in more detail below.

52  
53  
54 170 Older adults with a BMI of < 18.5 kg/m<sup>2</sup> will be excluded, because these participants  
55  
56 171 are likely to be undernourished (28) and should preferably receive general nutritional care  
57  
58 172 that is not provided in this trial. Those with a BMI of > 32.0 kg/m<sup>2</sup> will be also excluded,  
59  
60

1  
2  
3 173 because they should be advised to lose weight, which is not the aim of the present study and  
4  
5 174 may interfere with the study objective. Because participants of intervention group 2 will be  
6  
7  
8 175 advised to consume protein rich foods in close proximity of any usual physical activity, older  
9  
10 176 adults who are bedridden, wheelchair bound or do not go outside will be excluded from the  
11  
12 177 trial. Older adults with a diagnosis of severe kidney disease (i.e. treatment of a nephrologist  
13  
14 178 and/or protein-restricted diet, self-reported) will also be excluded as they should be advised to  
15  
16 179 limit their protein intake (2, 29-31). Older adults with a low cognitive status (Mini-Mental  
17  
18 180 State Examination (MMSE) score  $\leq 20$  (32)) will be excluded, as participants should be able  
19  
20 181 to understand and follow dietary advice if randomized to one of the intervention groups.  
21  
22  
23  
24 182

### 26 183 Calculation of protein intake using adjusted body weight

28 184 To calculate habitual protein intake in g/kg aBW/d for all (potential) participants and  
29  
30 185 recommended protein intake (participants in the two intervention groups), we apply adjusted  
31  
32  
33 186 BW depending on participants' age and BMI. We use adjusted body weight because  
34  
35 187 underweight persons require extra protein to build muscle tissue, while in overweight  
36  
37 188 persons, much 'extra weight' is adipose tissue. Protein intake in g/kg aBW/d is based on self-  
38  
39 189 reported BW during screening and afterwards based on measured BW during the baseline  
40  
41  
42 190 assessment, which is further used throughout the study. For those with a BMI  $> 25.0$  to  $32.0$   
43  
44 191  $\text{kg/m}^2$  (age  $\leq 70$  y) or  $> 27.0$  to  $32.0$   $\text{kg/m}^2$  (age  $> 70$  y) we apply aBW corresponding to a  
45  
46 192 BMI of respectively  $25.0$  or  $27.0$   $\text{kg/m}^2$ . For those with a BMI  $> 18.5$  to  $< 22.0$   $\text{kg/m}^2$  (age  $>$   
47  
48 193  $70$  y) we apply aBW corresponding to a BMI of respectively  $18.5$  or  $22.0$   $\text{kg/m}^2$  (33). For the  
49  
50 194 recommended protein intake, we apply adjusted BW which is based on baseline measured  
51  
52  
53  
54 195 BW.

56 196

58 197 *Recruitment and screening*

1  
2  
3 198 Two hundred and sixty-four community-dwelling adults aged 65 years and older will be  
4  
5 199 recruited at two study sites (metropolitan area of Finland including Helsinki, Espoo, Vantaa,  
6  
7 200 Kauniainen, and Amsterdam, the Netherlands). The recruitment strategy includes mass  
8  
9 201 mailing using addresses obtained from a random sample of the Finnish Population Registry  
10  
11 202 (in Finland only), newspaper advertisements, media coverage, lectures, oral presentations to  
12  
13 203 the target group, informing professionals working with older adults and flyers which will be  
14  
15 204 distributed at locations where many community-dwelling older adults visit.  
16  
17  
18

19 205 Older adults who are interested in participating will be asked to contact the local  
20  
21 206 PROMISS research team (by phone or by e-mail). Thereafter, screening by phone takes  
22  
23 207 place, only when verbal informed consent is given, in which the majority of the eligibility  
24  
25 208 criteria will be assessed along with an explanation of the study. Only those with a lower  
26  
27 209 habitual protein intake ( $< 1.0$  g/kg aBW/d) will be invited for the first clinic visit. Assessment  
28  
29 210 of habitual protein intake will be estimated in two steps: 1) initial screening by phone; 2) a  
30  
31 211 full dietary assessment based on a combination of three food diaries and three 24-h dietary  
32  
33 212 recalls to confirm lower habitual protein intake. Step 1, the initial screening is performed by  
34  
35 213 phone using the Protein Screener 55+ (Pro55+, available for use in English, Finnish and  
36  
37 214 Dutch: see [www.proteinscreener.nl/#/](http://www.proteinscreener.nl/#/)). This screening tool was specifically developed and  
38  
39 215 validated for this purpose (34). The screening results in a probability score (0-100%) of  
40  
41 216 having a protein intake below 1.0 g/kg aBW/d. At a probability of  $> 30\%$ , sensitivity and  
42  
43 217 specificity are optimally balanced (34). In the PROMISS trial we select persons with a  
44  
45 218 probability score varying between  $> 15\%$  (when initial response rates to recruitment  
46  
47 219 strategies are low) and  $> 30\%$  (when initial response rates are high), for the second step of  
48  
49 220 assessing habitual protein intake. Those who fulfill the eligibility criteria receive further  
50  
51 221 information on the study and a food diary with a booklet with pictures of portion sizes by post  
52  
53 222 to support the 24-h dietary recalls. After a minimum of one week of consideration, the  
54  
55  
56  
57  
58  
59  
60

1  
2  
3 223 research staff contacts the older adults, and among those who are still willing to participate  
4  
5 224 the full dietary assessment will take place (step 2). These potential participants will be asked  
6  
7  
8 225 to keep track of their dietary intake by filling out the provided food diary for three  
9  
10 226 consecutive days (three weekdays; or two weekdays and one weekend day). The booklet with  
11  
12 227 pictures of portion sizes that they received earlier will help them accurately filling out the  
13  
14 228 diary. Each day after, they will be called by a nutritionist to go through their food diary of the  
15  
16  
17 229 day before (24-h dietary recall). Potential participants are asked whether these days are  
18  
19 230 representative for their habitual diet. In case one of the three days is not representative, mean  
20  
21 231 protein intake is based on two instead of three days. In case of more than one non-  
22  
23  
24 232 representative day, the person will be excluded. The food intake data based on the 24-h  
25  
26 233 dietary recall will be entered into the program 'Fineli' for the Finnish data (35) and into the  
27  
28 234 program 'Eetmeter' of the Dutch Nutrition Center using an extended version of the Dutch  
29  
30 235 Food Composition Table of 2016 for the Dutch data (36) to calculate intake of macronutrients  
31  
32  
33 236 and micronutrients (vitamin D and vitamin B12). Participants with an actual protein intake  $\geq$   
34  
35 237 1.0 g/kg aBW/d (based on self-reported BW) will be excluded.

36  
37  
38 238 Potential participants with a mean habitual protein intake  $< 1.0$  g/kg aBW/d (based on  
39  
40 239 the three 24-h dietary recalls), will be invited for the clinic visit, where final eligibility  
41  
42 240 criteria will be assessed; MMSE  $> 20$ , ability to walk 400 m within 15 minutes (the use of a  
43  
44 241 cane is allowed, but without the use of a walker and no rest longer than 60 seconds), and BMI  
45  
46 242 of  $\geq 18.5$  kg/m<sup>2</sup> and  $\leq 32.0$  kg/m<sup>2</sup> based on measured BW and body height. When all  
47  
48 243 eligibility criteria are met, participants are included in the PROMISS trial.

49  
50  
51 244

#### 52 53 245 *Randomization, allocation and masking*

54  
55  
56 246 Randomization by means of a stratified block randomization procedure will be performed by  
57  
58 247 an independent statistician. Participants will be allocated in a 1:1:1 ratio to the three groups.  
59  
60

1  
2  
3 248 The size of the randomization blocks is three. Participants will be stratified according to their  
4  
5 249 baseline habitual protein intake (< 0.9 or 0.9-1.0 g/kg aBW/d) and sex to ensure  
6  
7  
8 250 homogeneous distribution of baseline habitual protein intake and sex in the three groups  
9  
10 251 across the two recruitment sites, because there may be a different intervention effect by  
11  
12 252 baseline habitual protein or sex. In case couples are eligible we will allocate them to the same  
13  
14 253 intervention group to limit interference between intervention groups. We will randomly select  
15  
16  
17 254 on which partner the randomization for the intervention group is based. Any resulting  
18  
19 255 unbalance in the number of subjects per treatment arm will be corrected in the randomization  
20  
21 256 of the next block. Due to the nature of the study, researchers, nutritionists and participants are  
22  
23  
24 257 not blinded to the study group.  
25  
26 258

### 28 259 *Study timeline*

30 260 The first clinic visit starts with written informed consent, and when participants are eligible,  
31  
32 261 the baseline assessment will be performed. The baseline assessment consists of  
33  
34 262 questionnaires (frailty status, risk of sarcopenia, self-reported mobility limitations, quality of  
35  
36 263 life (QoL) and health care costs) and measurements (physical function, muscle strength and  
37  
38 264 body composition). See below 'primary and secondary outcomes' and 'other measures' for  
39  
40 265 details on these assessments. An accelerometer will be attached to measure physical activity  
41  
42  
43 266 for 7 subsequent days.

44  
45  
46 267 After the baseline assessment, participants will be randomised to one of the three  
47  
48 268 study groups done by the nutritionists and they will inform the participants in which group  
49  
50 269 they are allocated to. Participants randomized to one of the two intervention groups will be  
51  
52 270 invited for a consultation meeting at the clinic to receive their personalized dietary advice,  
53  
54 271 and personalized advice on optimizing the timing of protein intake in close proximity of any  
55  
56 272 usual physical activity (intervention group 2 only). This will take place within 2 weeks after  
57  
58  
59  
60



1  
2  
3 273 the baseline assessment since the personalized advice needs to be composed by the  
4  
5 274 nutritionist. The baseline assessment is considered the start of the study period for  
6  
7  
8 275 participants of the control group, while the consultation meeting is considered the start of the  
9  
10 276 study period for participants of the intervention groups.

11  
12 277 One week prior to the 3-month follow-up visit, dietary intake will be assessed again  
13  
14 278 by means of a combination of three food diaries and three 24-h dietary recalls. The 3-month  
15  
16  
17 279 follow-up visit will take place at the clinic and includes measurement of BW, assessment of  
18  
19 280 self-reported mobility limitations, risk of sarcopenia, QoL, health care costs and the  
20  
21 281 accelerometer will be attached to measure physical activity for 7 subsequent days.

22  
23  
24 282 One week prior to the 6-month follow-up visit (final measurement) dietary intake will  
25  
26 283 again be assessed by means of a combination of three food diaries and three 24-h dietary  
27  
28 284 recalls, which allows us to determine compliance to the dietary advice. The 6-month follow-  
29  
30 285 up visit at the clinic includes all measurements performed during the baseline visit and the  
31  
32 286 accelerometer is attached again to measure physical activity for the next 7 days. Finally,  
33  
34 287 among participants of the intervention groups only, several questions regarding the  
35  
36 288 appreciation and adherence of the intervention and participants' intention to follow the  
37  
38 289 dietary advice in the future will be asked in order to perform a process-evaluation. Figure 1  
39  
40 290 shows the study timeline and Table 2 provides an overview of all measurements.  
41  
42  
43  
44  
45 291

#### 46 292 *Intervention*

47  
48  
49 293 Participants in the intervention group 1 will receive a personalized dietary advice by  
50  
51 294 nutritionists dedicated to this study aiming at increasing their protein intake to at least 1.2  
52  
53 295 g/kg aBW/d (without increasing total daily energy intake), based on their habitual dietary  
54  
55 296 characteristics, protein intake and measured BW assessed at baseline. The advice includes the  
56  
57 297 use of regular protein rich food products and protein enriched food products provided by the  
58  
59  
60



1  
2  
3 298 research team, and will be based on personal dietary preferences. Protein enriched food  
4  
5 299 products that can be incorporated within the regular diet include bars, cereals, puddings,  
6  
7  
8 300 coconut water and whey powder, which will be freely provided and shipped to participants'  
9  
10 301 home. Those products can be incorporated in the dietary advice as they can make it easier to  
11  
12 302 increase protein intake due to their high protein content. Participants receive guidelines how  
13  
14 303 to incorporate the protein enriched food products within their diet. The dietary advice will  
15  
16  
17 304 also incorporate the advice to consume at least one daily meal consisting of  $\geq 35$  g protein, as  
18  
19 305 studies have shown that this amount increases MPS in older adults (37-39).

20  
21 306 Participants in intervention group 2 will receive the same dietary advice as  
22  
23 307 intervention group 1, and the personalized advice to consume at least 7.5-10 g protein  
24  
25 308 through protein (en)rich(ed) food products within half an hour after performing any usual  
26  
27  
28 309 physical activity as this may enhance resistance exercise induced MPS (27). One RCT among  
29  
30 310 older adults has shown that protein supplementation in combination with resistance exercise  
31  
32 311 had beneficial effects on e.g. muscle mass and function, but no differences in effect were  
33  
34 312 found between protein consumption pre versus post resistance exercise (40). We therefore  
35  
36 313 recommend protein intake after physical activity as this is a uniform and more feasible advice  
37  
38 314 compared to 'in close proximity of', and might also result in less stomach discomfort as  
39  
40 315 compared to protein consumption prior to physical activity. Usual physical activity is defined  
41  
42 316 as either physical exercise (e.g. biking, swimming, tennis) or the most intensive activities of  
43  
44 317 daily living when the participant does not engage in physical exercise (e.g. gardening,  
45  
46 318 housekeeping, doing groceries) for a minimum of 30 minutes. The advice is linked to most  
47  
48 319 extensive or longest physical activity. Participants are instructed not to become more or less  
49  
50 320 physically active but merely to shift their physical activity or protein intake moment.

51 321 During the intervention period, nutritionists will plan follow-up phone calls in  
52  
53  
54 322 consultation with the participants during week 2, week 4, week 8, week 16 and week 20 to  
55  
56  
57  
58  
59  
60

1  
2  
3 323 ask if they have understood the advice and are able to adhere to the advice. In addition, any  
4  
5 324 issues related to the use of protein enriched food product can be discussed (intervention  
6  
7 325 groups only). If necessary, changes in the dietary advice will be made, for example when  
8  
9 326 weight change > 2 kg has occurred (based on self-assessment). Participants allocated to the  
10  
11 327 control group do not receive any intervention, but are contacted on similar time points as the  
12  
13 328 intervention groups to ask how they are doing.  
14  
15

16  
17 329 All participants are invited to a minimum of one organized lecture on non-health related  
18  
19 330 themes and other social events during the trial in order to stimulate their commitment to the  
20  
21 331 trial. Separate lectures/events (with the same topic) are organized for the intervention groups  
22  
23 332 and the control group to prevent interference between intervention arms.  
24  
25

26 333

#### 27 28 334 Compliance

29  
30 335 We will collect dietary intake prior to the 3-month follow-up visit (by means of the  
31  
32 336 combination of three food diaries and three 24-h dietary recalls) to assess compliance to the  
33  
34 337 dietary advice. This information allows the nutritionists to provide additional advice – if  
35  
36 338 needed – for participants in the intervention groups, which will be provided during the 3-  
37  
38 339 month follow-up visit. Dietary intake will again be assessed at follow-up and compliance to  
39  
40 340 the dietary advice will be determined.  
41  
42  
43

44 341

#### 45 46 342 Intervention fidelity

47  
48  
49 343 To ensure good adherence to the intervention protocols at both study sites, all personnel  
50  
51 344 working for the trial have undergone extensive training. The nutritionists will follow written  
52  
53 345 standardized operational procedures to develop and provide the personalized dietary advice  
54  
55 346 (with or without additional advice to consume protein within half an hour after any usual  
56  
57 347 physical activity). Four times during the conduct of the trial, the nutritionists from one site  
58  
59  
60

1  
2  
3 348 will visit the other site to attend assessments, and potentially notice and correct differences in  
4  
5 349 order to ensure identical execution of the trial at both sites. In addition, monthly Skype-  
6  
7 350 meetings will be held between all staff involved in the execution of the trial at both sites to  
8  
9 351 solve any potential day-to-day issues in a standardized way. Furthermore, identical  
10  
11 352 participant brochures and other printed materials have been developed and translated to  
12  
13 353 Dutch and Finnish language.  
14  
15  
16

17 354

18  
19 355 *Outcomes*

20  
21 356 Primary outcome

22  
23  
24 357 The primary outcome of the PROMISS trial is 6-months change in physical functioning  
25  
26 358 measured by change in walk time using a 400-m walk test (Long Distance Corridor Walk)  
27  
28 359 (41, 42). This test is predictive for higher risk of mortality, incident cardiovascular disease  
29  
30 360 and mobility limitation and disability (43). One advantage of this continuous outcome is that  
31  
32 361 it enables discrimination between categories of risk among participants (44), and it is less  
33  
34 362 prone to a ceiling effect as compared to other functional outcome measures (e.g. SPPB) (45).  
35  
36 363 The course for the 400-m test is 20-m long and marked by a traffic cone and tape line at the  
37  
38 364 beginning and end. For all participants, the test will begin with a mandatory 40-m walk  
39  
40 365 (warm-up) at their usual pace. Thereafter the 400-m test starts with the feet behind and just  
41  
42 366 touching the starting line and ends after 10 complete rounds when one foot is behind the end  
43  
44 367 line. For the 400-m test, older adults will be instructed to walk as fast as possible at a pace  
45  
46 368 they can maintain for 400 m. Standardized encouragement will be given each lap, including  
47  
48 369 the number of laps remaining. At the 6-month follow-up visit, older adults are allowed to use  
49  
50 370 a cane, can take rest as needed (but no rest longer than 60 seconds) and there will be a time  
51  
52 371 limit of 17 minutes. Time will be recorded to the nearest second.  
53  
54  
55  
56  
57  
58  
59  
60

1  
2  
3 373 Secondary outcomes  
4

5 374 The secondary outcomes are changes in physical functioning, muscle strength, body  
6  
7 375 composition, self-reported mobility limitations, QoL, incidence of frailty, incidence of  
8  
9 376 sarcopenia, and incidence of malnutrition. We will also investigate change in health care  
10  
11 377 costs.  
12  
13

14 378 Physical functioning will be assessed by means of the Short Physical Performance  
15  
16 379 Battery (SPPB) (46). The SPPB assesses lower extremity function which consists of three  
17  
18 380 timed tests: repeated (5x) chair stands test, 4-meter walk test and three standing balance tests  
19  
20 381 (ability to stand with the feet together in the side-by-side, semi-tandem, and tandem  
21  
22 382 positions). The total score ranges from 0-12. A higher score indicates better physical  
23  
24 383 functioning.  
25  
26

27 384 Muscle strength will be determined by hand-grip strength (kg). Hand-grip strength is  
28  
29 385 an indicator of overall muscle strength (47) and a higher hand grip strength is associated with  
30  
31 386 decreased risk of physical disabilities (48) and all-cause mortality in old age (48, 49).  
32  
33

34 387 Maximum grip strength will be measured three times at each hand during baseline and 6-  
35  
36 388 month follow-up visit. We will use a digital dynamometer (Saehan Digital Hand held  
37  
38 389 dynamometer) adjusted for hand size. Participants will be measured in an upright sitting  
39  
40 390 position with the forearms supported by the armrest of a chair according to a standardized  
41  
42 391 protocol (50). The mean of the maximum score of left and right hand will be used for  
43  
44 392 analyses. Muscle strength will also be determined by leg extension strength (N). A higher leg  
45  
46 393 extension strength is associated with decreased risk of mobility disability (51, 52) and higher  
47  
48 394 risk of early mortality (53-55). Leg extension strength will be assessed using a chair designed  
49  
50 395 to measure leg extension strength (56). Maximum leg extension strength will be measured  
51  
52 396 three times for each leg during baseline and 6-month follow-up visit. The mean of the  
53  
54 397 maximum score of left and right leg will be used for analyses.  
55  
56  
57  
58  
59  
60

1  
2  
3 398 Body composition will be estimated by means of bioelectrical impedance using the  
4  
5 399 BodyStat 1500MDD device, using the Kyle equation to determine fat percentage (%), fat  
6  
7 400 mass and fat-free mass (60) and the Sergi equation to determine appendicular skeletal muscle  
8  
9 401 mass (ASMM, kg) (61). Additionally, at the Dutch study site, body composition (fat free  
10  
11 402 mass (kg), fat mass and fat percentage (%)) will be measured by air displacement  
12  
13  
14 403 plethysmography (62).

15  
16  
17 404 Self-reported mobility limitations will be assessed by means of a questionnaire;  
18  
19 405 “Because of your health, how much difficulty do you have walking 400 meter?” and  
20  
21 406 “Because of your health, how much difficulty do you have climbing 10 steps?” Participants  
22  
23 407 will respond using a five level Likert scale: ‘no difficulty’, ‘a little difficulty’, ‘some  
24  
25 408 difficulty’, ‘a lot of difficulty’ and ‘unable to do the activity’.

26  
27  
28 409 QoL will be measured using the EuroQol 5D – 5L questionnaire (63).

29  
30  
31 410 Incident frailty will be assessed using the Fried criteria (57). Participants will be  
32  
33 411 considered ‘frail’ when three or more components are present. Those with no components  
34  
35 412 will be considered ‘robust’, whereas those with one or two components will be considered  
36  
37 413 ‘prefrail’. The criteria include 1) self-reported unintentional weight loss (> 4 kg in past 6  
38  
39 414 months), 2) self-reported exhaustion (based on two questions from the Center for  
40  
41 415 Epidemiologic Studies Depression (CES-D) scale on exhaustion in the past week at baseline  
42  
43 416 and follow-up: “I felt that everything I did was an effort” and “I could not get going”. Scores  
44  
45 417 ranges from 1 ‘rarely or none of the time’ to 4 ‘always or most of the time’. A score of 3 or 4  
46  
47 418 on either question indicates exhaustion (58), 3) weakness (grip strength in the lowest 20% of  
48  
49 419 the whole study population based on the mean of the maximum scores, adjusted for gender  
50  
51 420 and BMI), 4) slow walking speed (walk time on the 4m walk test in the slowest 20% of the  
52  
53 421 whole study population, adjusted for gender and height), and 5) low physical activity (total  
54  
55 422 counts per week based on the accelerometer data in the lowest 20% of physical activity for  
56  
57  
58  
59  
60

1  
2  
3 423 each gender). Incident frailty is considered deterioration of frailty status; i.e. from robust at  
4  
5 424 baseline to pre-frail or frail at follow-up or from pre-frail at baseline to frail at follow. Frail  
6  
7  
8 425 participants at baseline will be excluded from these analyses.

9  
10 426 Incidence of sarcopenia will be assessed with the SARC-F questionnaire (59); how  
11  
12 427 much effort do you experience when 1) lifting and carrying a bag of 4.5 kilo, 2) walking  
13  
14 428 across a room, 3) transferring from a chair or bed, 4) climbing a flight of 10 stairs, and 5)  
15  
16  
17 429 how many times have you fallen in the past year. Answering option include no effort (0  
18  
19 430 points), a bit of effort (1 point) and a lot of effort (2 points), where a score equal to or greater  
20  
21 431 than 4 is predictive of sarcopenia and poor outcomes. Participants with sarcopenia at baseline  
22  
23  
24 432 will be excluded from these analyses.

25  
26 433 Incidence of malnutrition will be defined as BMI < 22.0 kg/m<sup>2</sup> or unintentional  
27  
28 434 weight loss > 5% in the last 6 months. Malnourished participants at baseline will be excluded  
29  
30  
31 435 from these analyses.

32  
33 436 A modified version of the Resource Utilization in Dementia Questionnaire (RUD)  
34  
35 437 (64) will be used to collect data on health care and social utilization costs over the period  
36  
37 438 three month prior to baseline, three months prior to the 3-month follow-up visit and three  
38  
39  
40 439 months prior to 6-month follow-up visit. Costs include costs of primary and secondary care,  
41  
42 440 complementary care, informal care and home care.

43  
44  
45 441

#### 46 47 442 Other measures

48  
49 443 BW will be measured without shoes in underwear to the nearest 0.1 kg using a digital  
50  
51 444 calibrated scale (Finland; SECA 877, the Netherlands; Marsden M-520). Body height will be  
52  
53 445 measured to the nearest millimeter using a SECA stadiometer for mobile height  
54  
55  
56 446 measurements (Finland; SECA 217, the Netherlands; SECA 214). Corrections will be made  
57  
58 447 to adjust the measured body weight for clothing, shoes or a cast (minus 1 kg for each  
59  
60

1  
2  
3 448 element), and to adjust the measured body height for shoes (minus 1 cm). Physical activity  
4  
5 449 will be objectively assessed by means of an accelerometer (Axivity, AX3) during 7  
6  
7  
8 450 subsequent days after each clinic visit (baseline, 3-month follow-up visit and 6-month follow-  
9  
10 451 up visit). The accelerometer will be attached by a nutritionist to the frontal part of the right  
11  
12 452 thigh in the mid-point between iliac crest and patella bone when sitting down, with a surgical  
13  
14 453 plaster. Participants can perform any physical activity as the accelerometer is water resistant.  
15  
16  
17 454 Appetite will be measured with SNAQ-Appetite questionnaire (65). Dietary intake will be  
18  
19 455 assessed by means of a combination of three food diaries and three 24-h dietary recalls prior  
20  
21 456 the 3-month follow-up visit and the 6-month follow-up visit.  
22  
23

24 457

25  
26 458 *Sample size and statistical analyses*27  
28 459 Sample size

29  
30 460 The study is powered to detect a substantial meaningful change of 28 sec (SD=61 sec) (66)  
31  
32 461 between the respective intervention groups and the control group on the primary outcome  
33  
34 462 walk time on the 400-m walk test, assuming a 2-sided test at  $\alpha=0.05$  with a power of 0.8. For  
35  
36 463 this, 75 participants per group are needed, which is 225 in total. Assuming a drop-out of 15%  
37  
38 464 (which was reported in a comparable study of Bhasin et al. 2018 (19), the total number of  
39  
40 465 study participants to be included in the study will be n=264. Thus, a total of n=132 at each  
41  
42 466 study site (n=44 per group per study site).  
43  
44  
45  
46

47 467

48  
49 468 Statistical analyses plan

50  
51 469 Statistical reporting will be according to the CONSORT standards (67). The collected data at  
52  
53 470 the two study sites will be pooled together at the Amsterdam site, with a variable indicating  
54  
55 471 study site. All statistical analyses on primary and secondary outcome measures will be  
56  
57  
58  
59  
60



1  
2  
3 472 performed by an independent statistician blinded for group allocation. Baseline  
4  
5 473 characteristics will be described (percentages, means  $\pm$  standard deviations) by study group.  
6

7  
8 474 The primary analyses will be based on the intention-to-treat principle, i.e. data from  
9  
10 475 participants allocated to the intervention groups will be analyzed as part of those groups,  
11  
12 476 irrespectively of their level of adherence to the advice. Multiple Imputation using  
13  
14 477 multivariate Imputation by Chained Equations will be used to impute missing cost and effect  
15  
16 478 data. The continuous primary outcome (change in 400-m walk time) will be analyzed using  
17  
18 479 mixed model regression analyses with study site and participating partner as random variable.  
19  
20 480 We will adjust for baseline 400-m walk time as well as baseline protein intake (g/kg aBW/d)  
21  
22 481 and sex (the stratification factors for randomization). We will compare intervention effects of  
23  
24 482 the respective intervention groups versus the control group. Effects will also be expressed in  
25  
26 483 Cohen's d and the corresponding 95% confidence intervals will be calculated, which allows  
27  
28 484 comparison between intervention effect estimates between different outcome measures. The  
29  
30 485 secondary outcomes and other measures will be analyzed using mixed model regression  
31  
32 486 analogously to the primary outcome. For binary secondary outcomes, generalized estimating  
33  
34 487 equation models will be used. With regard to time-to-event analyses (incident sarcopenia and  
35  
36 488 mobility limitations) Cox proportional hazard models will be used. Time-to-event is defined  
37  
38 489 as the time of the start of the study period to the date of the first occurrence of the event (3-  
39  
40 490 month follow-up visit or 6-month follow-up visit). Participants who do not meet these criteria  
41  
42 491 will be censored at the latest time we had information available. We will perform subgroup  
43  
44 492 analyses stratified by baseline protein intake ( $< 0.9$  or  $0.9-1.0$  g/kg aBW/d), sex and baseline  
45  
46 493 400-m time (based on median) for the primary and secondary outcomes.  
47  
48

49  
50  
51 494 Per-protocol analyses will also be conducted as a sensitivity analysis. Effect estimates  
52  
53 495 for change in primary and secondary outcome measures will be calculated for participants  
54  
55 496 from the intervention groups who reached the protein target of at least 1.2 g/kg aBW/d after  
56  
57  
58  
59  
60



1  
2  
3 497 both 3 and after 6 months (mean protein intake based on the three 24-h dietary recalls) vs.  
4  
5 498 participants from the control group. Data will be analyzed using SPSS (IBM SPSS Statistics.  
6  
7 499 Armonk, NY). A two-sided *P*-value of 0.05 is considered statistical significant.  
8  
9

10 500 The cost-effectiveness analysis will be performed from a healthcare perspective. Total  
11  
12 501 mean costs during the study will be related to physical functioning (the 400-m walk test) and  
13  
14 502 change in Quality-Adjusted Life-Years based on the EuroQol 5D questionnaire. Mixed model  
15  
16 503 regression analyses will be used to estimate differences in the primary outcome of the  
17  
18 504 respective interventions groups versus the control group. Linear regression analyses will be  
19  
20 505 used to estimate differences in QoL (expressed as Quality-Adjusted Life-Years) and  
21  
22 506 healthcare costs. Incremental cost-effectiveness ratios will be calculated by dividing the  
23  
24 507 difference in costs by the difference in effects. Statistical uncertainty will be estimated using  
25  
26 508 bias-corrected accelerated bootstrapping (5000 replications) and will be presented using cost-  
27  
28 509 effectiveness planes and cost-effectiveness acceptability curves.  
29  
30  
31  
32

33 510

### 34 35 511 *Participants' safety*

36  
37 512 In case any (medical) questions arise during the screening or intervention period, participants  
38  
39 513 can consult an independent medical doctor. All adverse events and serious adverse events  
40  
41 514 will be tracked by the nutritionists during the follow-up phone calls, 3-month follow-up visit  
42  
43 515 and 6-month follow-up visit to assess their potential relationship to the intervention at both  
44  
45 516 sites and will be documented in the final report. Adverse events will be reported within 7 days  
46  
47 517 (death or life threatening situations) or within 15 days (in case of other adverse events) of  
48  
49 518 first knowledge to The Medical Ethical Committee of the Amsterdam UMC, location Vumc  
50  
51 519 (required for the Dutch site only).  
52  
53  
54  
55

56 520

### 57 58 521 *Data quality assurance and data management*

59  
60

1  
2  
3 522 Research data will be collected at each site and each visit (baseline, 3-month follow-up visit  
4  
5 523 and 6-month follow-up visit) using a standardized protocol with the same order of  
6  
7 524 assessments, and entered twice in separate electronic datasets. When discrepancies between  
8  
9 525 the datasets are found, the original questionnaire will be consulted. Questionnaire items and  
10  
11 526 measurements will include the corresponding variable names to minimize errors in data  
12  
13 527 entering. Finally the two final electronic dataset (one from each site) containing all data will  
14  
15 528 be pooled. A data catalogue and codebook will be developed.

16  
17  
18  
19 529 Original questionnaires will be stored in a secure manner at each site in an area with  
20  
21 530 limited access. All records that contain names (i.e. informed consent forms), will be stored  
22  
23 531 separately from study records identified by code number. All databases will be secured with  
24  
25 532 password-protected access systems.  
26  
27  
28  
29

30 533

### 31 534 *Ancillary studies*

32  
33 535 Within the PROMISS trial, three ancillary studies will be conducted: 1) persuasive  
34  
35 536 technology study, 2) microbiota study, and 3) fMRI study.  
36  
37  
38  
39

40 537

#### 40 538 1. Persuasive technology study

41  
42 539 The primary aim of this study is to examine the effect of persuasive technology on adherence  
43  
44 540 to the personalized dietary advice aiming at increasing protein intake to at least 1.2 g/kg  
45  
46 541 aBW/d in a sub-sample of Dutch participants from intervention group 1 (n=24) and  
47  
48 542 intervention group 2 (n=24), i.e. the first 24 participants of intervention group 1 and the first  
49  
50 543 24 participants of intervention group 2 that consent to it (writing informed consent will be  
51  
52 544 signed).  
53  
54

55  
56 545 Participants will be provided with a food storage box that registers which provided  
57  
58 546 protein enriched food products are taken out. The food box is used to store the protein  
59  
60

1  
2  
3 547 enriched food products provided by the research team. Participants will also receive a tablet  
4  
5 548 that allows participants to register any consumed protein enriched food products and supports  
6  
7 549 them in finding alternative food products that contain a comparable amount of protein. For  
8  
9 550 this, the system uses the personalized dietary advice as provided by the nutritionist and data  
10  
11 551 from the storage box. The tablet application aims to stimulate adherence to the dietary advice  
12  
13 552 by providing tailored and personalized messages. In addition, personality characteristics and  
14  
15 553 communication style preferences that are determined via a questionnaire completed at  
16  
17 554 baseline are used to tailor the style and tone of these messages (68).

18  
19  
20  
21 555 In addition to the personalized messages, half of the participants from intervention  
22  
23 556 group 1 and 2 who participate in the persuasive technology sub-study will also receive a  
24  
25 557 gamified version of the tablet application (n=12 + n=12). In this version, participants can earn  
26  
27 558 game-points by registering their consumed protein (en)rich(ed) food products and by playing  
28  
29 559 mini-games about the protein content of foods (i.e. guess the protein content, more-or-less  
30  
31 560 protein). The distribution of receiving the gamified version vs. standard version is quasi-  
32  
33 561 randomized, where we will balance the group size.

34  
35  
36  
37 562 At the consultation meeting, participants receive their food storage box and tablet.  
38  
39 563 Both are fully configured, i.e. they are loaded with their personal dietary advice. After the 6-  
40  
41 564 month follow-up visit, participants will be asked to return the equipment and fill out  
42  
43 565 questions on the feasibility and user experience of the provided persuasive technology.

44  
45  
46  
47 566 The secondary objectives are 1) to investigate to what extent participants perceive  
48  
49 567 messages of which the style and tone are adapted to their personal characteristics as  
50  
51 568 personalized and adequate, and 2) to determine the effect of gamification on the effectiveness  
52  
53 569 and feasibility of the persuasive technology.

54  
55  
56 570

57  
58 571 2. Microbiota study

1  
2  
3 572 In the microbiota study, the effect of personalized dietary advice aiming at increasing protein  
4  
5 573 intake in community-dwelling older adults with lower habitual protein intake on both the oral  
6  
7 574 and gut microbiota is investigated. The study will be conducted at both study sites.  
8  
9

10 575 The human microbiota consists of the  $4 \times 10^{13}$  micro-organisms that inhabit the body  
11  
12 576 (69). The emergence of next generation DNA sequencing techniques at the start of the 21<sup>st</sup>  
13  
14 577 century has allowed more detailed study of the microbiota and since then, the microbiota  
15  
16 578 composition has been associated with both health and disease (70), as well as aging itself (71,  
17  
18 579 72). Moreover, several interventional studies proved that dietary changes also affect the gut  
19  
20 580 microbiota, with the first microbial shifts being evident within 48 hours (73). The altered  
21  
22 581 microbiota in turn, can differentially affect the human host metabolism through the  
23  
24 582 production of metabolically active metabolites. Less is known about the oral microbiota. It  
25  
26 583 was found to be associated with oral health and function and even nutritional status (74, 75),  
27  
28 584 but its possible role in undernutrition in older adults has not been investigated.  
29  
30  
31  
32

33 585 A fresh frozen fecal sample and tongue swab is collected at baseline and 6-month  
34  
35 586 follow-up visit once written informed consent is provided. Participants from either the control  
36  
37 587 group or intervention group 1 can be included in this study. Participants from the intervention  
38  
39 588 group 2 are excluded to limit the number of groups and parameters in this exploratory study.  
40  
41 589 Additional exclusion criteria are: use of systemic antibiotics in the three months prior to the  
42  
43 590 first sampling visit, diagnosis with inflammatory bowel disease and prolonged  
44  
45 591 institutionalization (> 4 weeks) in the three months prior to the first sampling visit. There is  
46  
47 592 no restriction other than consent rate to the number of PROMISS participants that will be  
48  
49 593 included in this side study.  
50  
51  
52  
53

54 594 Once all samples from all participants are collected, fecal samples are shipped to the  
55  
56 595 Wallenberg Laboratory of Cardiovascular and Metabolic research (at the University of  
57  
58 596 Gothenburg, in Sweden) for 16S rRNA sequencing using sequencing methods previously  
59  
60

1  
2  
3 597 described (76). The tongue swabs will be send to the Netherlands Organisation for Applied  
4  
5 598 Scientific Research for 16S rRNA sequencing as is previously described (77).  
6  
7  
8 599

9  
10 600 3. fMRI study  
11

12 601 In the fMRI study, we will investigate the effect of personalized dietary advice aiming at  
13  
14 602 increasing protein intake in community-dwelling older adults with lower habitual protein  
15  
16 603 intake on central brain circuits involved in the regulation of appetite. Several studies  
17  
18 604 demonstrated that increasing protein intake affects appetite (78) and the gut microbiota (79).  
19  
20 605 However, none have studied the effects on both simultaneously, or the interaction. A  
21  
22 606 functional MRI (fMRI) scan will be used to measure the brain responses to visual or actual  
23  
24 607 food cues. Brain activity in response to food cues will also be related to (shifts) in the gut  
25  
26 608 microbiota. Therefore, only participants from the microbiota side study can be included in  
27  
28 609 this study, with additional exclusion criteria: being claustrophobic, being diagnosed with a  
29  
30 610 mental disorder (e.g. depression or addiction), being uncorrectable visually or hearing  
31  
32 611 impaired, or having a contra-indication for MRI-scans (e.g. having a pacemaker). Up to 50  
33  
34 612 participants will be included in this side study. This side study will only be conducted at the  
35  
36 613 Dutch study site.  
37  
38  
39  
40  
41

42 614       Once written informed consent is provided, participants who are included in this side  
43  
44 615 study will be asked to visit the Amsterdam University Medical Centre, location VUmc, for an  
45  
46 616 fMRI scan twice during the study period: at baseline and at 6-month follow-up visit. Prior to  
47  
48 617 the fMRI-scan, additional salivary and blood samples will be collected for determination of  
49  
50 618 additional nutritional and microbial biomarkers. The protocol for the fMRI experiments have  
51  
52 619 been previously described (80, 81).  
53  
54  
55

56 620

57  
58 621 **Discussion**  
59  
60

1  
2  
3 622 There is an ongoing discussion whether the EFSA RDA of 0.8 g protein /kg BW/d is  
4  
5 623 sufficient for older adults and whether it should be increased to at least 1.0-1.2 g protein/kg  
6  
7 624 BW/d to support muscle health and functioning. National guidelines of some European  
8  
9 625 countries already increased their RDA, i.e. the RDA of the German-speaking countries (D-A-  
10  
11 626 CH) is increased to 1.0 g/kg BW/d (82), and the Nordic Nutrition Recommendation has  
12  
13 627 increased their RDA to 1.2 g/kg BW/d (83). The PROMISS trial is the first RCT which will  
14  
15 628 investigate the effect of personalized dietary advice aiming at increasing protein intake and  
16  
17 629 the combined effect of personalized dietary advice aiming at increasing protein and optimally  
18  
19 630 timing protein intake in close proximity of any usual physical activity, on change in physical  
20  
21 631 functioning after 6 months among community-dwelling older adults ( $\geq 65$  y) with a habitual  
22  
23 632 protein intake of  $< 1.0$  g/kg adjusted (a)BW/d. The PROMISS trial will therefore provide  
24  
25 633 additional insight to the question whether the current EFSA RDA for protein for older adults  
26  
27 634 should be increased to 1.2 g/kg aBW/d, and whether optimal timing of protein intake will  
28  
29 635 additionally benefit physical functioning.  
30  
31  
32  
33  
34  
35  
36  
37

38 637 A strong and unique aspect of the PROMISS trial is that we will include participants with a  
39  
40 638 habitual protein intake  $< 1.0$  g/kg aBW/d, excluding those with a BMI  $< 18.5$  and  $> 32.0$   
41  
42 639 kg/m<sup>2</sup>. This will allow us to examine the effects of increasing protein intake from  $< 1.0$  to at  
43  
44 640 least 1.2 g/kg aBW/d. An innovative component of our study is that we will investigate the  
45  
46 641 combined benefit of increasing protein intake and timing of protein intake with any usual  
47  
48 642 physical activity on physical functioning and other health related outcomes. Another strength  
49  
50 643 is that in our study the intervention is based on personalized dietary advice which is likely  
51  
52 644 more feasible in the long term to maintain in everyday life, compared to providing custom-  
53  
54 645 prepared meals (19) or protein supplements (84, 85), as done in most other studies. Finally,  
55  
56 646 we will be able to investigate the effect of persuasive technology on adherence to the dietary  
57  
58  
59  
60

1  
2  
3 647 advice strategy, and the effect of the dietary advice on the microbiota composition and on  
4  
5 648 central responses to food-cues in brain areas involved in appetite regulation.  
6  
7

8 649

9  
10 650 In summary, this randomized controlled trial will demonstrate the effectiveness of  
11  
12 651 personalized dietary advice aiming at increasing protein intake to at least 1.2 g protein/kg  
13  
14 652 BW/d on physical functioning in older adults with a lower habitual protein intake, with or  
15  
16  
17 653 without the advice to consume protein in close proximity of any usual physical activity.  
18

19 654

20  
21 655  
22  
23  
24  
25  
26  
27  
28  
29  
30  
31  
32  
33  
34  
35  
36  
37  
38  
39  
40  
41  
42  
43  
44  
45  
46  
47  
48  
49  
50  
51  
52  
53  
54  
55  
56  
57  
58  
59  
60

1  
2  
3 **656 List of abbreviations**  
4

5 657 aBW = adjusted body weight  
6

7  
8 658 BMI = body mass index  
9

10 659 BW = body weight  
11

12 660 fMRI-scan: Functional Magnetic Resonance Imaging scan  
13

14 661 MMSE = Mini Mental State Examination  
15

16 662 MPS = muscle protein synthesis  
17

18 663 PROMISS = PRevention Of Malnutrition In Senior Subjects  
19

20 664 QoL = quality of life  
21

22 665 RCT = randomized controlled trial  
23

24 666 RDA = recommended daily allowance  
25

26 667 RUD = Resource Utilization in Dementia Questionnaire  
27

28 668 SARC-F = Simple Questionnaire to Rapidly Diagnose Sarcopenia  
29

30 669 SD = standard deviation  
31

32 670 SPPB = Short Physical Performance Battery  
33  
34  
35  
36  
37  
38  
39  
40  
41  
42  
43  
44  
45  
46  
47  
48  
49  
50  
51  
52  
53  
54  
55  
56  
57  
58  
59  
60



1  
2  
3 **671 Declarations**  
4

5  
6 672

7  
8 **673 Ethics approval and consent to participate**  
9

10 674 The study has been approved by the Ethics Committee of the Helsinki University Central  
11 Hospital, Finland and The Medical Ethical Committee of the Amsterdam UMC, location  
12 675 VUmc, Amsterdam, the Netherlands. Oral informed consent will be obtained from each  
13  
14 676 participants before the screening procedure and written informed (please see appendix I)  
15  
16 677 consent will be obtained from each participant before any measurement take place.  
17  
18 678  
19  
20  
21

22 679

23  
24 **680 Consent for publication**  
25

26 681 Not applicable. Personal data were not identifiable during the analysis.  
27  
28 682

29  
30  
31 **683 Availability of data and materials**  
32

33 684 Datasets from this research will be stored at the repository of the Vrije Universiteit  
34  
35 685 Amsterdam, the Netherlands and potentially available for other researchers after submitting a  
36  
37 686 research proposal.  
38  
39

40 687

41  
42 **688 Competing interests**  
43

44 689 The authors declare that they have no competing interests.  
45  
46 690

47  
48  
49 **691 Funding**  
50

51 692 Funding for this research is provided by EU Horizon 2020 PROMISS Project ‘Prevention Of  
52  
53 693 Malnutrition In Senior Subjects in the EU’, Grant agreement no. 678732. Funding sponsors  
54  
55 694 did not participate in the study design, collection, management, analysis and interpretation of  
56  
57  
58  
59  
60

1  
2  
3 695 data; or writing of the manuscript. They did not participate in the decision to submit the  
4  
5 696 report for publication, nor had ultimate authority over any of these activities.  
6  
7  
8 697

9  
10 698 **Protein enriched food products**

11  
12 699 Protein enriched food products are provided by Kellogg and Fonterra. Costs for these  
13  
14 700 products are also funded through the EU Horizon 2020 PROMISS grant.  
15  
16  
17 701

18  
19 702 **Author Contributions**

20  
21 703 *IR, HAHW, IAB, MRO* and *MV* obtained funding for the PROMISS project. *IR* and *HAHW*  
22  
23 704 coordinate the trial center at the Vrije Universiteit Amsterdam, the Netherlands. *SKJ* and  
24  
25 705 *MHS* coordinate the trial center at the Helsinki University, Finland. All authors contributed to  
26  
27 706 conception of and designing the trial. *IR* drafted the manuscript. *JB* provided cost-  
28  
29 707 effectiveness expertise in clinical trial design. *LDK* provided statistical expertise and will  
30  
31 708 conduct the primary statistical analysis. *KSF* drafted the sections for the microbiota and fMRI  
32  
33 709 ancillary studies. *MCAK* and *LML* drafted the section for the persuasive technology study.  
34  
35 710 *HAHW, SKJ, MHS, RN, IAB, MRO, KHP, RV* and *MV* critically reviewed the manuscript. All  
36  
37 711 authors approved the final version.  
38  
39  
40  
41  
42 712

43  
44 713 **Acknowledgements**

45  
46 714 We acknowledge the members of the PROMISS trial group (please see Appendix II) and we  
47  
48 715 thank the study participants.  
49  
50  
51 716

52  
53 717 **Trial status**

54  
55 718 The Trial was registered in ClinicalTrials.gov. Title of registration: The (Cost)Effectiveness  
56  
57 719 of Increasing Protein Intake on Physical Functioning in Older Adults. Number of  
58  
59  
60

1  
2  
3  
4  
5  
6  
7  
8  
9  
10  
11  
12  
13  
14  
15  
16  
17  
18  
19  
20  
21  
22  
23  
24  
25  
26  
27  
28  
29  
30  
31  
32  
33  
34  
35  
36  
37  
38  
39  
40  
41  
42  
43  
44  
45  
46  
47  
48  
49  
50  
51  
52  
53  
54  
55  
56  
57  
58  
59  
60

720 identification: NCT03712306. October 2018. Recruitment commenced in November 2018  
721 and ended in November 2019.

For peer review only

722 **References**

723

724 1. EFSA. Scientific Opinion on Dietary Reference Values for protein. EFSA Panel on  
725 Dietetic Products, Nutrition and Allergies (NDA). EFSA Journal. 2012;10:2257.

726 2. Bauer J, Biolo G, Cederholm T, Cesari M, Cruz-Jentoft AJ, Morley JE, et al.

727 Evidence-based recommendations for optimal dietary protein intake in older people: a  
728 position paper from the PROT-AGE Study Group. J Am Med Dir Assoc.  
729 2013;14:542-559.

730 3. Deutz NE, Bauer JM, Barazzoni R, Biolo G, Boirie Y, Bony-Westphal A, et al.

731 Protein intake and exercise for optimal muscle function with aging: recommendations  
732 from the ESPEN Expert Group. Clin Nutr. 2014;33:929-936.

733 4. Cuthbertson D, Smith K, Babraj J, Leese G, Waddell T, Atherton P, et al. Anabolic

734 signaling deficits underlie amino acid resistance of wasting, aging muscle. FASEB J.  
735 2005;19:422-424.

736 5. Moore DR, Churchward-Venne TA, Witard O, Breen L, Burd NA, Tipton KD, et al.

737 Protein ingestion to stimulate myofibrillar protein synthesis requires greater relative  
738 protein intakes in healthy older versus younger men. J Gerontol A Biol Sci Med Sci.  
739 2015;70:57-62.

740 6. Wall BT, Gorissen SH, Pennings B, Koopman R, Groen BB, Verdijk LB, et al. Aging

741 Is Accompanied by a Blunted Muscle Protein Synthetic Response to Protein

742 Ingestion. PLoS One. 2015;10:e0140903.

743 7. Murphy CH, Saddler NI, Devries MC, McGlory C, Baker SK, Phillips SM. Leucine

744 supplementation enhances integrative myofibrillar protein synthesis in free-living

745 older men consuming lower- and higher-protein diets: a parallel-group crossover

746 study. Am J Clin Nutr. 2016;104:1594-1606.

- 1  
2  
3 747 8. Holwerda AM, Paulussen KJM, Overkamp M, Goessens JPB, Kramer IF, Wodzig W,  
4  
5 748 et al. Dose-Dependent Increases in Whole-Body Net Protein Balance and Dietary  
6  
7 749 Protein-Derived Amino Acid Incorporation into Myofibrillar Protein During  
8  
9 750 Recovery from Resistance Exercise in Older Men. *J Nutr.* 2019;149:221-230.  
10  
11  
12 751 9. Houston DK, Nicklas BJ, Ding J, Harris TB, Tylavsky FA, Newman AB, et al.  
13  
14 752 Dietary protein intake is associated with lean mass change in older, community-  
15  
16 753 dwelling adults: the Health, Aging, and Body Composition (Health ABC) Study. *Am*  
17  
18 754 *J Clin Nutr.* 2008;87:150-155.  
19  
20  
21 755 10. Houston DK, Tooze JA, Garcia K, Visser M, Rubin S, Harris TB, et al. Protein Intake  
22  
23 756 and Mobility Limitation in Community-Dwelling Older Adults: the Health ABC  
24  
25 757 Study. *J Am Geriatr Soc.* 2017;65:1705-1711.  
26  
27  
28 758 11. Gray-Donald K, St-Arnaud-McKenzie D, Gaudreau P, Morais JA, Shatenstein B,  
29  
30 759 Payette H. Protein intake protects against weight loss in healthy community-dwelling  
31  
32 760 older adults. *J Nutr.* 2014;144:321-326.  
33  
34  
35 761 12. Mendonca N, Granic A, Hill TR, Siervo M, Mathers JC, Kingston A, et al. Protein  
36  
37 762 Intake and Disability Trajectories in Very Old Adults: The Newcastle 85+ Study. *J*  
38  
39 763 *Am Geriatr Soc.* 2019;67:50-56.  
40  
41  
42 764 13. Ten Haaf DSM, Nuijten MAH, Maessen MFH, Horstman AMH, Eijsvogels TMH,  
43  
44 765 Hopman MTE. Effects of protein supplementation on lean body mass, muscle  
45  
46 766 strength, and physical performance in nonfrail community-dwelling older adults: a  
47  
48 767 systematic review and meta-analysis. *Am J Clin Nutr.* 2018;108:1043-1059.  
49  
50  
51 768 14. Layman DK. Dietary Guidelines should reflect new understandings about adult  
52  
53 769 protein needs. *Nutr Metab (Lond).* 2009;6:12.  
54  
55  
56 770 15. Paddon-Jones D, Campbell WW, Jacques PF, Kritchevsky SB, Moore LL, Rodriguez  
57  
58 771 NR, et al. Protein and healthy aging. *Am J Clin Nutr.* 2015;  
59  
60

- 1  
2  
3 772 16. Park Y, Choi JE, Hwang HS. Protein supplementation improves muscle mass and  
4  
5 773 physical performance in undernourished prefrail and frail elderly subjects: a  
6  
7 774 randomized, double-blind, placebo-controlled trial. *Am J Clin Nutr.* 2018;108:1026-  
8  
9 775 1033.  
10  
11  
12 776 17. Ten Haaf DSM, Eijsvogels TMH, Bongers C, Horstman AMH, Timmers S, de Groot  
13  
14 777 L, et al. Protein supplementation improves lean body mass in physically active older  
15  
16 778 adults: a randomized placebo-controlled trial. *J Cachexia Sarcopenia Muscle.* 2019;  
17  
18 779 18. Beelen J, de Roos NM, de Groot L. A 12-week intervention with protein-enriched  
19  
20 780 foods and drinks improved protein intake but not physical performance of older  
21  
22 781 patients during the first 6 months after hospital release: a randomised controlled trial.  
23  
24 782 *Br J Nutr.* 2017;117:1541-1549.  
25  
26 783 19. Bhasin S, Apovian CM, Travison TG, Pencina K, Moore LL, Huang G, et al. Effect of  
27  
28 784 Protein Intake on Lean Body Mass in Functionally Limited Older Men: A  
29  
30 785 Randomized Clinical Trial. *JAMA Intern Med.* 2018;178:530-541.  
31  
32 786 20. Cermak NM, Res PT, de Groot LC, Saris WH, van Loon LJ. Protein supplementation  
33  
34 787 augments the adaptive response of skeletal muscle to resistance-type exercise training:  
35  
36 788 a meta-analysis. *Am J Clin Nutr.* 2012;96:1454-1464.  
37  
38 789 21. Finger D, Goltz FR, Umpierre D, Meyer E, Rosa LH, Schneider CD. Effects of  
39  
40 790 protein supplementation in older adults undergoing resistance training: a systematic  
41  
42 791 review and meta-analysis. *Sports Med.* 2015;45:245-255.  
43  
44 792 22. Rondanelli M, Klersy C, Terracol G, Talluri J, Mageri R, Guido D, et al. Whey  
45  
46 793 protein, amino acids, and vitamin D supplementation with physical activity increases  
47  
48 794 fat-free mass and strength, functionality, and quality of life and decreases  
49  
50 795 inflammation in sarcopenic elderly. *Am J Clin Nutr.* 2016;103:830-840.  
51  
52  
53  
54  
55  
56  
57  
58  
59  
60

- 1  
2  
3 796 23. Liao CD, Tsauo JY, Wu YT, Cheng CP, Chen HC, Huang YC, et al. Effects of  
4  
5 797 protein supplementation combined with resistance exercise on body composition and  
6  
7 798 physical function in older adults: a systematic review and meta-analysis. *Am J Clin*  
8  
9 799 *Nutr.* 2017;106:1078-1091.
- 10  
11  
12 800 24. Englund DA, Kim DR, Koochek A, Zhu H, Trivison TG, Reid KF, et al. Nutritional  
13  
14 801 Supplementation With Physical Activity Improves Muscle Composition in Mobility-  
15  
16 802 Limited Older Adults, The VIVE2 Study: A Randomized, Double-Blind, Placebo-  
17  
18 803 Controlled Trial. *J Gerontol A Biol Sci Med Sci.* 2017;73:95-101.
- 19  
20  
21 804 25. Mori H, Tokuda Y. Effect of whey protein supplementation after resistance exercise  
22  
23 805 on the muscle mass and physical function of healthy older women: A randomized  
24  
25 806 controlled trial. *Geriatr Gerontol Int.* 2018;18:1398-1404.
- 26  
27  
28 807 26. Seino S, Sumi K, Narita M, Yokoyama Y, Ashida K, Kitamura A, et al. Effects of  
29  
30 808 Low-Dose Dairy Protein Plus Micronutrient Supplementation during Resistance  
31  
32 809 Exercise on Muscle Mass and Physical Performance in Older Adults: A Randomized,  
33  
34 810 Controlled Trial. *J Nutr Health Aging.* 2018;22:59-67.
- 35  
36  
37 811 27. Cribb PJ, Hayes A. Effects of supplement timing and resistance exercise on skeletal  
38  
39 812 muscle hypertrophy. *Med Sci Sports Exerc.* 2006;38:1918-1925.
- 40  
41  
42 813 28. Cederholm T, Jensen GL, Correia M, Gonzalez MC, Fukushima R, Higashiguchi T, et  
43  
44 814 al. GLIM criteria for the diagnosis of malnutrition - A consensus report from the  
45  
46 815 global clinical nutrition community. *Clin Nutr.* 2019;38:1-9.
- 47  
48  
49 816 29. Fouque D, Aparicio M. Eleven reasons to control the protein intake of patients with  
50  
51 817 chronic kidney disease. *Nat Clin Pract Nephrol.* 2007;3:383-392.
- 52  
53  
54 818 30. Fouque D, Pelletier S, Mafra D, Chauveau P. Nutrition and chronic kidney disease.  
55  
56 819 *Kidney Int.* 2011;80:348-357.
- 57  
58  
59  
60

- 1  
2  
3 820 31. Eyre S, Attman PO, Haraldsson B. Positive effects of protein restriction in patients  
4  
5 821 with chronic kidney disease. *J Ren Nutr.* 2008;18:269-280.  
6  
7 822 32. Folstein MF, Folstein SE, McHugh PR. "Mini-mental state". A practical method for  
8  
9 823 grading the cognitive state of patients for the clinician. *J Psychiatr Res.* 1975;12:189-  
10  
11 824 198.  
12  
13 825 33. Berner LA, Becker G, Wise M, Doi J. Characterization of dietary protein among older  
14  
15 826 adults in the United States: amount, animal sources, and meal patterns. *J Acad Nutr*  
16  
17 827 *Diet.* 2013;113:809-815.  
18  
19 828 34. Wijnhoven HAH, Elstgeest LEM, de Vet HCW, Nicolaou M, Snijder MB, Visser M.  
20  
21 829 Development and validation of a short food questionnaire to screen for low protein  
22  
23 830 intake in community-dwelling older adults: The Protein Screener 55+ (Pro55+). *PLoS*  
24  
25 831 *One.* 2018;13:e0196406.  
26  
27 832 35. The National Institute for Health and Welfare. Fineli: the National Food Composition  
28  
29 833 Database in Finland. [Available from: <https://fineli.fi/fineli/en/index?>  
30  
31 834 36. Nederlands Voedingsstoffenbestand 2016 (Dutch Food Composition Table 2016):  
32  
33 835 Voedingscentrum 2016; [Available from: <https://nevo-online.rivm.nl/>.  
34  
35 836 37. English KL, Paddon-Jones D. Protecting muscle mass and function in older adults  
36  
37 837 during bed rest. *Curr Opin Clin Nutr Metab Care.* 2010;13:34-39.  
38  
39 838 38. Paddon-Jones D, Rasmussen BB. Dietary protein recommendations and the  
40  
41 839 prevention of sarcopenia. *Curr Opin Clin Nutr Metab Care.* 2009;12:86-90.  
42  
43 840 39. Deutz NE, Wolfe RR. Is there a maximal anabolic response to protein intake with a  
44  
45 841 meal? *Clin Nutr.* 2013;32:309-313.  
46  
47 842 40. Nabuco HCG, Tomeleri CM, Sugihara Junior P, Fernandes RR, Cavalcante EF,  
48  
49 843 Antunes M, et al. Effects of Whey Protein Supplementation Pre- or Post-Resistance  
50  
51  
52  
53  
54  
55  
56  
57  
58  
59  
60



- 1  
2  
3 844 Training on Muscle Mass, Muscular Strength, and Functional Capacity in Pre-  
4  
5 845 Conditioned Older Women: A Randomized Clinical Trial. *Nutrients*. 2018;10:  
6  
7 846 41. Simonsick EM, Montgomery PS, Newman AB, Bauer DC, Harris T. Measuring  
8  
9 847 fitness in healthy older adults: the Health ABC Long Distance Corridor Walk. *J Am*  
10  
11 848 *Geriatr Soc*. 2001;49:1544-1548.  
12  
13 849 42. Simonsick EM, Fan E, Fleg JL. Estimating cardiorespiratory fitness in well-  
14  
15 850 functioning older adults: treadmill validation of the long distance corridor walk. *J Am*  
16  
17 851 *Geriatr Soc*. 2006;54:127-132.  
18  
19 852 43. Newman AB, Simonsick EM, Naydeck BL, Boudreau RM, Kritchevsky SB, Nevitt  
20  
21 853 MC, et al. Association of long-distance corridor walk performance with mortality,  
22  
23 854 cardiovascular disease, mobility limitation, and disability. *JAMA*. 2006;295:2018-  
24  
25 855 2026.  
26  
27 856 44. Beaudart C, Rolland Y, Cruz-Jentoft AJ, Bauer JM, Sieber C, Cooper C, et al.  
28  
29 857 Assessment of Muscle Function and Physical Performance in Daily Clinical Practice :  
30  
31 858 A position paper endorsed by the European Society for Clinical and Economic  
32  
33 859 Aspects of Osteoporosis, Osteoarthritis and Musculoskeletal Diseases (ESCEO).  
34  
35 860 *Calcif Tissue Int*. 2019;105:1-14.  
36  
37 861 45. Sayers SP, Guralnik JM, Newman AB, Brach JS, Fielding RA. Concordance and  
38  
39 862 discordance between two measures of lower extremity function: 400 meter self-paced  
40  
41 863 walk and SPPB. *Aging Clin Exp Res*. 2006;18:100-106.  
42  
43 864 46. Guralnik JM, Simonsick EM, Ferrucci L, Glynn RJ, Berkman LF, Blazer DG, et al. A  
44  
45 865 short physical performance battery assessing lower extremity function: association  
46  
47 866 with self-reported disability and prediction of mortality and nursing home admission.  
48  
49 867 *J Gerontol*. 1994;49:M85-94.  
50  
51  
52  
53  
54  
55  
56  
57  
58  
59  
60

- 1  
2  
3 868 47. Rantanen T, Era P, Heikkinen E. Maximal Isometric Muscle Strength and  
4  
5 869 Socioeconomic Status, Health, and Physical Activity in 75-Year-Old Persons. *Journal*  
6  
7 870 *of Aging and Physical Activity*. 1994;2:206-220.
- 8  
9  
10 871 48. Rijk JM, Roos PR, Deckx L, van den Akker M, Buntinx F. Prognostic value of  
11  
12 872 handgrip strength in people aged 60 years and older: A systematic review and meta-  
13  
14 873 analysis. *Geriatr Gerontol Int*. 2016;16:5-20.
- 15  
16  
17 874 49. Wu Y, Wang W, Liu T, Zhang D. Association of Grip Strength With Risk of All-  
18  
19 875 Cause Mortality, Cardiovascular Diseases, and Cancer in Community-Dwelling  
20  
21 876 Populations: A Meta-analysis of Prospective Cohort Studies. *J Am Med Dir Assoc*.  
22  
23 877 2017;18:551 e517-551 e535.
- 24  
25  
26 878 50. Roberts HC, Denison HJ, Martin HJ, Patel HP, Syddall H, Cooper C, et al. A review  
27  
28 879 of the measurement of grip strength in clinical and epidemiological studies: towards a  
29  
30 880 standardised approach. *Age Ageing*. 2011;40:423-429.
- 31  
32  
33 881 51. Visser M, Goodpaster BH, Kritchevsky SB, Newman AB, Nevitt M, Rubin SM, et al.  
34  
35 882 Muscle mass, muscle strength, and muscle fat infiltration as predictors of incident  
36  
37 883 mobility limitations in well-functioning older persons. *J Gerontol A Biol Sci Med Sci*.  
38  
39 884 2005;60:324-333.
- 40  
41  
42 885 52. Reinders I, Murphy RA, Koster A, Brouwer IA, Visser M, Garcia ME, et al. Muscle  
43  
44 886 Quality and Muscle Fat Infiltration in Relation to Incident Mobility Disability and  
45  
46 887 Gait Speed Decline: the Age, Gene/Environment Susceptibility-Reykjavik Study. *J*  
47  
48 888 *Gerontol A Biol Sci Med Sci*. 2015;70:1030-1036.
- 49  
50  
51 889 53. Reinders I, Murphy RA, Brouwer IA, Visser M, Launer L, Siggeirsdottir K, et al.  
52  
53 890 Muscle Quality and Myosteatosis: Novel Associations With Mortality Risk: The Age,  
54  
55 891 Gene/Environment Susceptibility (AGES)-Reykjavik Study. *Am J Epidemiol*.  
56  
57 892 2016;183:53-60.  
58  
59  
60

- 1  
2  
3 893 54. Volaklis KA, Halle M, Meisinger C. Muscular strength as a strong predictor of  
4  
5 894 mortality: A narrative review. *Eur J Intern Med.* 2015;26:303-310.  
6  
7 895 55. Garcia-Hermoso A, Cavero-Redondo I, Ramirez-Velez R, Ruiz JR, Ortega FB, Lee  
8  
9 896 DC, et al. Muscular Strength as a Predictor of All-Cause Mortality in an Apparently  
10  
11 897 Healthy Population: A Systematic Review and Meta-Analysis of Data From  
12  
13 898 Approximately 2 Million Men and Women. *Arch Phys Med Rehabil.* 2018;99:2100-  
14  
15 899 2113 e2105.  
16  
17 900 56. Gerrits HL, Hopman MT, Sargeant AJ, de Haan A. Reproducibility of contractile  
18  
19 901 properties of the human paralysed and non-paralysed quadriceps muscle. *Clin Physiol.*  
20  
21 902 2001;21:105-113.  
22  
23 903 57. Fried LP, Tangen CM, Walston J, Newman AB, Hirsch C, Gottdiener J, et al. Frailty  
24  
25 904 in older adults: evidence for a phenotype. *J Gerontol A Biol Sci Med Sci.*  
26  
27 905 2001;56:M146-156.  
28  
29 906 58. Radloff LS. The CES-D Scale: A Self-Report Depression Scale for Research in the  
30  
31 907 General Population. *Appl Psychol Meas.* 1977;1:385-401.  
32  
33 908 59. Malmstrom TK, Morley JE. SARC-F: a simple questionnaire to rapidly diagnose  
34  
35 909 sarcopenia. *J Am Med Dir Assoc.* 2013;14:531-532.  
36  
37 910 60. Kyle UG, Genton L, Karsegard L, Slosman DO, Pichard C. Single prediction equation  
38  
39 911 for bioelectrical impedance analysis in adults aged 20--94 years. *Nutrition.*  
40  
41 912 2001;17:248-253.  
42  
43 913 61. Sergi G, De Rui M, Veronese N, Bolzetta F, Berton L, Carraro S, et al. Assessing  
44  
45 914 appendicular skeletal muscle mass with bioelectrical impedance analysis in free-living  
46  
47 915 Caucasian older adults. *Clin Nutr.* 2015;34:667-673.  
48  
49  
50  
51  
52  
53  
54  
55  
56  
57  
58  
59  
60

- 1  
2  
3 916 62. McCrory MA, Gomez TD, Bernauer EM, Mole PA. Evaluation of a new air  
4  
5 917 displacement plethysmograph for measuring human body composition. *Med Sci*  
6  
7 918 *Sports Exerc.* 1995;27:1686-1691.
- 9  
10 919 63. EuroQol G. EuroQol--a new facility for the measurement of health-related quality of  
11  
12 920 life. *Health Policy.* 1990;16:199-208.
- 14 921 64. Wimo A. Evaluation of the resource utilization and caregiver time in Anti-dementia  
15  
16 922 drug trials-a quantitative battery. *The health economics of dementia.* 1998;
- 18  
19 923 65. Wilson MM, Thomas DR, Rubenstein LZ, Chibnall JT, Anderson S, Baxi A, et al.  
20  
21 924 Appetite assessment: simple appetite questionnaire predicts weight loss in  
22  
23 925 community-dwelling adults and nursing home residents. *Am J Clin Nutr.*  
24  
25 926 2005;82:1074-1081.
- 27  
28 927 66. Perera S, Studenski S, Newman A, Simonsick E, Harris T, Schwartz A, et al. Are  
29  
30 928 estimates of meaningful decline in mobility performance consistent among clinically  
31  
32 929 important subgroups? (Health ABC study). *J Gerontol A Biol Sci Med Sci.*  
33  
34 930 2014;69:1260-1268.
- 36  
37 931 67. Schulz KF, Altman DG, Moher D, Group C. CONSORT 2010 Statement: updated  
38  
39 932 guidelines for reporting parallel group randomised trials. *BMC Med.* 2010;8:18.
- 41  
42 933 68. Lubbe LMvd, Klein MCA. Designing a system with persuasive communication to  
43  
44 934 improve diet compliance for elderly users. *Proceedings of the 13th EAI International*  
45  
46 935 *Conference on Pervasive Computing Technologies for Healthcare; Trento, Italy.*  
47  
48 936 3329217: ACM; 2019. p. 234-241.
- 50  
51 937 69. Sender R, Fuchs S, Milo R. Are We Really Vastly Outnumbered? Revisiting the Ratio  
52  
53 938 of Bacterial to Host Cells in Humans. *Cell.* 2016;164:337-340.
- 55  
56 939 70. Schroeder BO, Backhed F. Signals from the gut microbiota to distant organs in  
57  
58 940 physiology and disease. *Nat Med.* 2016;22:1079-1089.  
59  
60

- 1  
2  
3 941 71. Biagi E, Nylund L, Candela M, Ostan R, Bucci L, Pini E, et al. Through ageing, and  
4  
5 942 beyond: gut microbiota and inflammatory status in seniors and centenarians. PLoS  
6  
7 943 One. 2010;5:e10667.
- 8  
9  
10 944 72. Odamaki T, Kato K, Sugahara H, Hashikura N, Takahashi S, Xiao JZ, et al. Age-  
11  
12 945 related changes in gut microbiota composition from newborn to centenarian: a cross-  
13  
14 946 sectional study. BMC Microbiol. 2016;16:90.
- 15  
16  
17 947 73. David LA, Maurice CF, Carmody RN, Gootenberg DB, Button JE, Wolfe BE, et al.  
18  
19 948 Diet rapidly and reproducibly alters the human gut microbiome. Nature.  
20  
21 949 2014;505:559-563.
- 22  
23  
24 950 74. Yamashita Y, Takeshita T. The oral microbiome and human health. J Oral Sci.  
25  
26 951 2017;59:201-206.
- 27  
28 952 75. Testa M, Erbiti S, Delgado A, Cardenas IL. Evaluation of oral microbiota in  
29  
30 953 undernourished and eutrophic children using checkerboard DNA-DNA hybridization.  
31  
32 954 Anaerobe. 2016;42:55-59.
- 33  
34  
35 955 76. Deschasaux M, Bouter KE, Prodan A, Levin E, Groen AK, Herrema H, et al.  
36  
37 956 Depicting the composition of gut microbiota in a population with varied ethnic origins  
38  
39 957 but shared geography. Nat Med. 2018;24:1526-1531.
- 40  
41  
42 958 77. Bosch A, Levin E, van Houten MA, Hasrat R, Kalkman G, Biesbroek G, et al.  
43  
44 959 Development of Upper Respiratory Tract Microbiota in Infancy is Affected by Mode  
45  
46 960 of Delivery. EBioMedicine. 2016;9:336-345.
- 47  
48  
49 961 78. Mollahosseini M, Shab-Bidar S, Rahimi MH, Djafarian K. Effect of whey protein  
50  
51 962 supplementation on long and short term appetite: A meta-analysis of randomized  
52  
53 963 controlled trials. Clinical nutrition ESPEN. 2017;20:34-40.
- 54  
55  
56 964 79. van de Wouw M, Schellekens H, Dinan TG, Cryan JF. Microbiota-Gut-Brain Axis:  
57  
58 965 Modulator of Host Metabolism and Appetite. J Nutr. 2017;147:727-745.  
59  
60

- 1  
2  
3 966 80. van Bloemendaal L, RG IJ, Ten Kulve JS, Barkhof F, Konrad RJ, Drent ML, et al.  
4  
5 967 GLP-1 receptor activation modulates appetite- and reward-related brain areas in  
6  
7 968 humans. *Diabetes*. 2014;63:4186-4196.
- 9  
10 969 81. van Bloemendaal L, Veltman DJ, Ten Kulve JS, Groot PF, Ruhe HG, Barkhof F, et al.  
11  
12 970 Brain reward-system activation in response to anticipation and consumption of  
13  
14 971 palatable food is altered by glucagon-like peptide-1 receptor activation in humans.  
15  
16 972 *Diabetes Obes Metab*. 2015;17:878-886.
- 17  
18  
19 973 82. Nutrition reference intake values for the German Speaking Countries D-A-CH ed 2,  
20  
21 974 update 1 Bonn2016 [Available from:  
22  
23 975 <https://www.dge.de/wissenschaft/referenzwerte/protein/>.  
24  
25
- 26 976 83. Nordic Council of Ministers. Nordic nutrition recommendations 2012. Integrating  
27  
28 977 nutrition physical activity; 2014. pp. 1e627. Copenhagen.
- 29  
30 978 84. Tieland M, Franssen R, Dullemeyer C, van Dronkelaar C, Kyung Kim H, Ispoglou T,  
31  
32 979 et al. The Impact of Dietary Protein or Amino Acid Supplementation on Muscle Mass  
33  
34 980 and Strength in Elderly People: Individual Participant Data and Meta-Analysis of  
35  
36 981 RCT's. *J Nutr Health Aging*. 2017;21:994-1001.
- 37  
38  
39 982 85. Reinders I, Volkert D, de Groot L, Beck AM, Feldblum I, Jobse I, et al. Effectiveness  
40  
41 983 of nutritional interventions in older adults at risk of malnutrition across different  
42  
43 984 health care settings: Pooled analyses of individual participant data from nine  
44  
45 985 randomized controlled trials. *Clin Nutr*. 2019;38:1797-1806.
- 46  
47  
48 986 86. Saunders JB, Aasland OG, Babor TF, de la Fuente JR, Grant M. Development of the  
49  
50 987 Alcohol Use Disorders Identification Test (AUDIT): WHO Collaborative Project on  
51  
52 988 Early Detection of Persons with Harmful Alcohol Consumption--II. *Addiction*.  
53  
54 989 1993;88:791-804.  
55  
56  
57  
58  
59  
60

990 **Tables**

991

992 **Table 1.** Eligibility criteria for participation of the PROMISS trial

---

**Inclusion criteria**

---

Community-dwelling

Age  $\geq$  65 yearsHabitual protein intake  $<$  1.0 g protein/kg aBW/dBMI  $\geq$  18.5 kg/m<sup>2</sup> and  $\leq$  32.0 kg/m<sup>2</sup> (based on measured weight and height)

Self-reported ability to eat independently

Ability to speak, write and read the local language (Finnish or Dutch)

Ability to walk 400 meters within 15 minutes, without the use of a walker and no rest

longer than 60 seconds

---

**Exclusion criteria**

---

Inability or unwillingness to provide informed consent

Current participation in supervised behavioural or lifestyle intervention that intervenes with the PROMISS trial

Not able to visit the research site in the following next 6 months

Bedridden, wheelchair bound or always being inside

Self-reported Parkinson's disease

Diagnosis of severe kidney disease (self-reported)

Diagnosis of type I diabetes mellitus (self-reported)

Diagnosis of type II diabetes mellitus and requiring use of insulin started within 6 months (self-reported)

Current treatment of cancer (with the exception of basal cell carcinoma)

Vegan diet

1  
2  
3 Severe allergies to certain food product (peanut, gluten)  
4

5 Diagnosis of an eating disorder (self-reported)  
6

7 Purposefully lost/gained > 3 kg in the past three months  
8

9  
10 Heart problems in the past three months, defined as heart attack, angioplasty, heart surgery,  
11  
12 stroke, severe shortness of breath during physical activity (self-reported)  
13

14 Alcohol abuse during past 6 months, defined as the AUDIT-C score  $\geq 3$  (86)  
15

16 Low cognitive status, defined as the MMSE score  $\leq 20$  (32)  
17

18  
19 993 Abbreviations: aBW; adjusted body weight, BMI; Body Mass Index, MMSE; Mini-Mental  
20

21 994 State Examination.  
22

23  
24 995  
25  
26  
27  
28  
29  
30  
31  
32  
33  
34  
35  
36  
37  
38  
39  
40  
41  
42  
43  
44  
45  
46  
47  
48  
49  
50  
51  
52  
53  
54  
55  
56  
57  
58  
59  
60



996 **Table 2.** Measurements and time of measurements in the PROMISS trial

|                                 |                                                                  | <b>Timeline</b>  |                  |                 |                |                |
|---------------------------------|------------------------------------------------------------------|------------------|------------------|-----------------|----------------|----------------|
|                                 |                                                                  | <b>Screening</b> | <b>Screening</b> | <b>Baseline</b> | <b>3-month</b> | <b>6-month</b> |
|                                 |                                                                  | (phone)          | visit            | visit           | FU visit       | FU visit       |
|                                 |                                                                  |                  | (prior           |                 |                |                |
|                                 |                                                                  |                  | baseline)        |                 |                |                |
| <b>Topic</b>                    | <b>Specific variables</b>                                        |                  |                  |                 |                |                |
| Oral informed consent (phone)   |                                                                  | ✓                |                  |                 |                |                |
| Screening questionnaire (phone) | Sex, age, self-reported weight, height, eligibility criteria     | ✓                |                  |                 |                |                |
| Protein intake                  | Pro55+ screening (34) (phone)                                    | ✓                |                  |                 |                |                |
| Protein intake                  | Combination of three food diaries and three 24-h dietary recalls |                  | ✓                |                 | ✓              | ✓              |
| Written informed consent        |                                                                  |                  | ✓                |                 |                |                |
| Cognitive function              | MMSE (32)                                                        |                  | ✓                |                 |                |                |

For peer review only

|    |                                    |                                              |   |   |   |
|----|------------------------------------|----------------------------------------------|---|---|---|
| 1  |                                    |                                              |   |   |   |
| 2  |                                    |                                              |   |   |   |
| 3  | Physical functioning               | 400-m walk test (41, 42)                     | ✓ |   | ✓ |
| 4  |                                    |                                              |   |   |   |
| 5  |                                    |                                              |   |   |   |
| 6  | Antropometrics                     | Measured body height                         | ✓ |   |   |
| 7  |                                    |                                              |   |   |   |
| 8  | Antropometrics                     | Measured body weight                         | ✓ | ✓ | ✓ |
| 9  |                                    |                                              |   |   |   |
| 10 |                                    |                                              |   |   |   |
| 11 | Demographic                        | Education, household                         |   | ✓ |   |
| 12 |                                    |                                              |   |   |   |
| 13 |                                    |                                              |   |   |   |
| 14 | General characteristics            | Perceived health, smoking status             |   | ✓ | ✓ |
| 15 |                                    |                                              |   |   |   |
| 16 | Body composition                   | Bio-electrical impedance                     |   | ✓ | ✓ |
| 17 |                                    |                                              |   |   |   |
| 18 |                                    |                                              |   |   |   |
| 19 | Body composition                   | Air displacement plethysmography (Dutch site |   | ✓ | ✓ |
| 20 |                                    | only)                                        |   |   |   |
| 21 |                                    |                                              |   |   |   |
| 22 |                                    |                                              |   |   |   |
| 23 |                                    |                                              |   |   |   |
| 24 | Physical functioning               | SPPB (46)                                    |   | ✓ | ✓ |
| 25 |                                    |                                              |   |   |   |
| 26 | Muscle strength                    | Handgrip strength                            |   | ✓ | ✓ |
| 27 |                                    |                                              |   |   |   |
| 28 |                                    |                                              |   |   |   |
| 29 | Muscle strength                    | Leg extension strength                       |   | ✓ | ✓ |
| 30 |                                    |                                              |   |   |   |
| 31 |                                    |                                              |   |   |   |
| 32 | Self-reported mobility limitations | Ability to walk 400m and climb one flight of |   | ✓ | ✓ |
| 33 |                                    | stairs                                       |   |   | ✓ |
| 34 |                                    |                                              |   |   |   |
| 35 |                                    |                                              |   |   |   |
| 36 | Risk of sarcopenia                 | SARC-F questionnaire (59)                    |   | ✓ | ✓ |
| 37 |                                    |                                              |   |   | ✓ |
| 38 |                                    |                                              |   |   |   |
| 39 |                                    |                                              |   |   |   |
| 40 |                                    |                                              |   |   |   |
| 41 |                                    |                                              |   |   |   |
| 42 |                                    |                                              |   |   |   |
| 43 |                                    |                                              |   |   |   |
| 44 |                                    |                                              |   |   |   |
| 45 |                                    |                                              |   |   |   |
| 46 |                                    |                                              |   |   |   |

1  
2  
3  
4  
5  
6  
7  
8  
9  
10  
11  
12  
13  
14  
15  
16  
17  
18  
19  
20  
21  
22  
23  
24  
25  
26  
27  
28  
29  
30  
31  
32  
33  
34  
35  
36  
37  
38  
39  
40  
41  
42  
43  
44  
45  
46

|                                    |                                                                                                                          |   |   |   |
|------------------------------------|--------------------------------------------------------------------------------------------------------------------------|---|---|---|
| Malnutrition                       | GLIM phenotypic criteria (28)                                                                                            | ✓ |   | ✓ |
| Frailty                            | Frailty Fried Frailty Index (57)                                                                                         | ✓ |   | ✓ |
| Quality of Life                    | EuroQol 5D (63)                                                                                                          | ✓ | ✓ | ✓ |
| Health care costs                  | RUD (64)                                                                                                                 | ✓ | ✓ | ✓ |
| Appetite                           | SNAQ-Appetite (65)                                                                                                       | ✓ |   | ✓ |
| Physical activity                  | Accelerometers                                                                                                           | ✓ | ✓ | ✓ |
| Process evaluation                 |                                                                                                                          |   |   | ✓ |
| <i>Persuasive technology study</i> |                                                                                                                          |   |   |   |
| Communication style preferences    | Personality traits form                                                                                                  | ✓ |   |   |
| Usage data of technology           | Practical experiences, interaction data of technology (number of notifications, openings, registered food intake, games) |   | ✓ | ✓ |
| Attitude towards technology        | Questionnaire                                                                                                            |   |   | ✓ |

*Microbiota study*

|                 |                                                  |   |   |
|-----------------|--------------------------------------------------|---|---|
| Oral health     | Questionnaire                                    | ✓ | ✓ |
| Oral microbiota | Tongue swab (16S rRNA sequencing)                | ✓ | ✓ |
| Gut microbiota  | Fresh frozen faecal sample (16S rRNA sequencing) | ✓ | ✓ |

*fMRI study*

|                                   |                                                                                        |   |   |
|-----------------------------------|----------------------------------------------------------------------------------------|---|---|
| Oral microbiota                   | Fasted unstimulated salivary sample (16S rRNA sequencing)                              | ✓ | ✓ |
| Nutritional and microbial markers | Blood sample                                                                           | ✓ | ✓ |
| Appetite                          | VAS-scores of appetite and central neural responses to food-cues measured by fMRI-scan | ✓ | ✓ |

997

998

1  
2  
3  
4  
5  
6  
7  
8  
9  
10  
11  
12  
13  
14  
15  
16  
17  
18  
19  
20  
21  
22  
23  
24  
25  
26  
27  
28  
29  
30  
31  
32  
33  
34  
35  
36  
37  
38  
39  
40  
41  
42  
43  
44  
45  
46  
47  
48  
49  
50  
51  
52  
53  
54  
55  
56  
57  
58  
59  
60

999 **Figure legends**

1000

1001 **Figure 1.** Study timeline of the PROMISS trial

For peer review only

1  
2  
3  
4  
5  
6  
7  
8  
9  
10  
11  
12  
13  
14  
15  
16  
17  
18  
19  
20  
21  
22  
23  
24  
25  
26  
27  
28  
29  
30  
31  
32  
33  
34  
35  
36  
37  
38  
39  
40  
41  
42  
43  
44  
45  
46  
47  
48  
49  
50  
51  
52  
53  
54  
55  
56  
57  
58  
59  
60

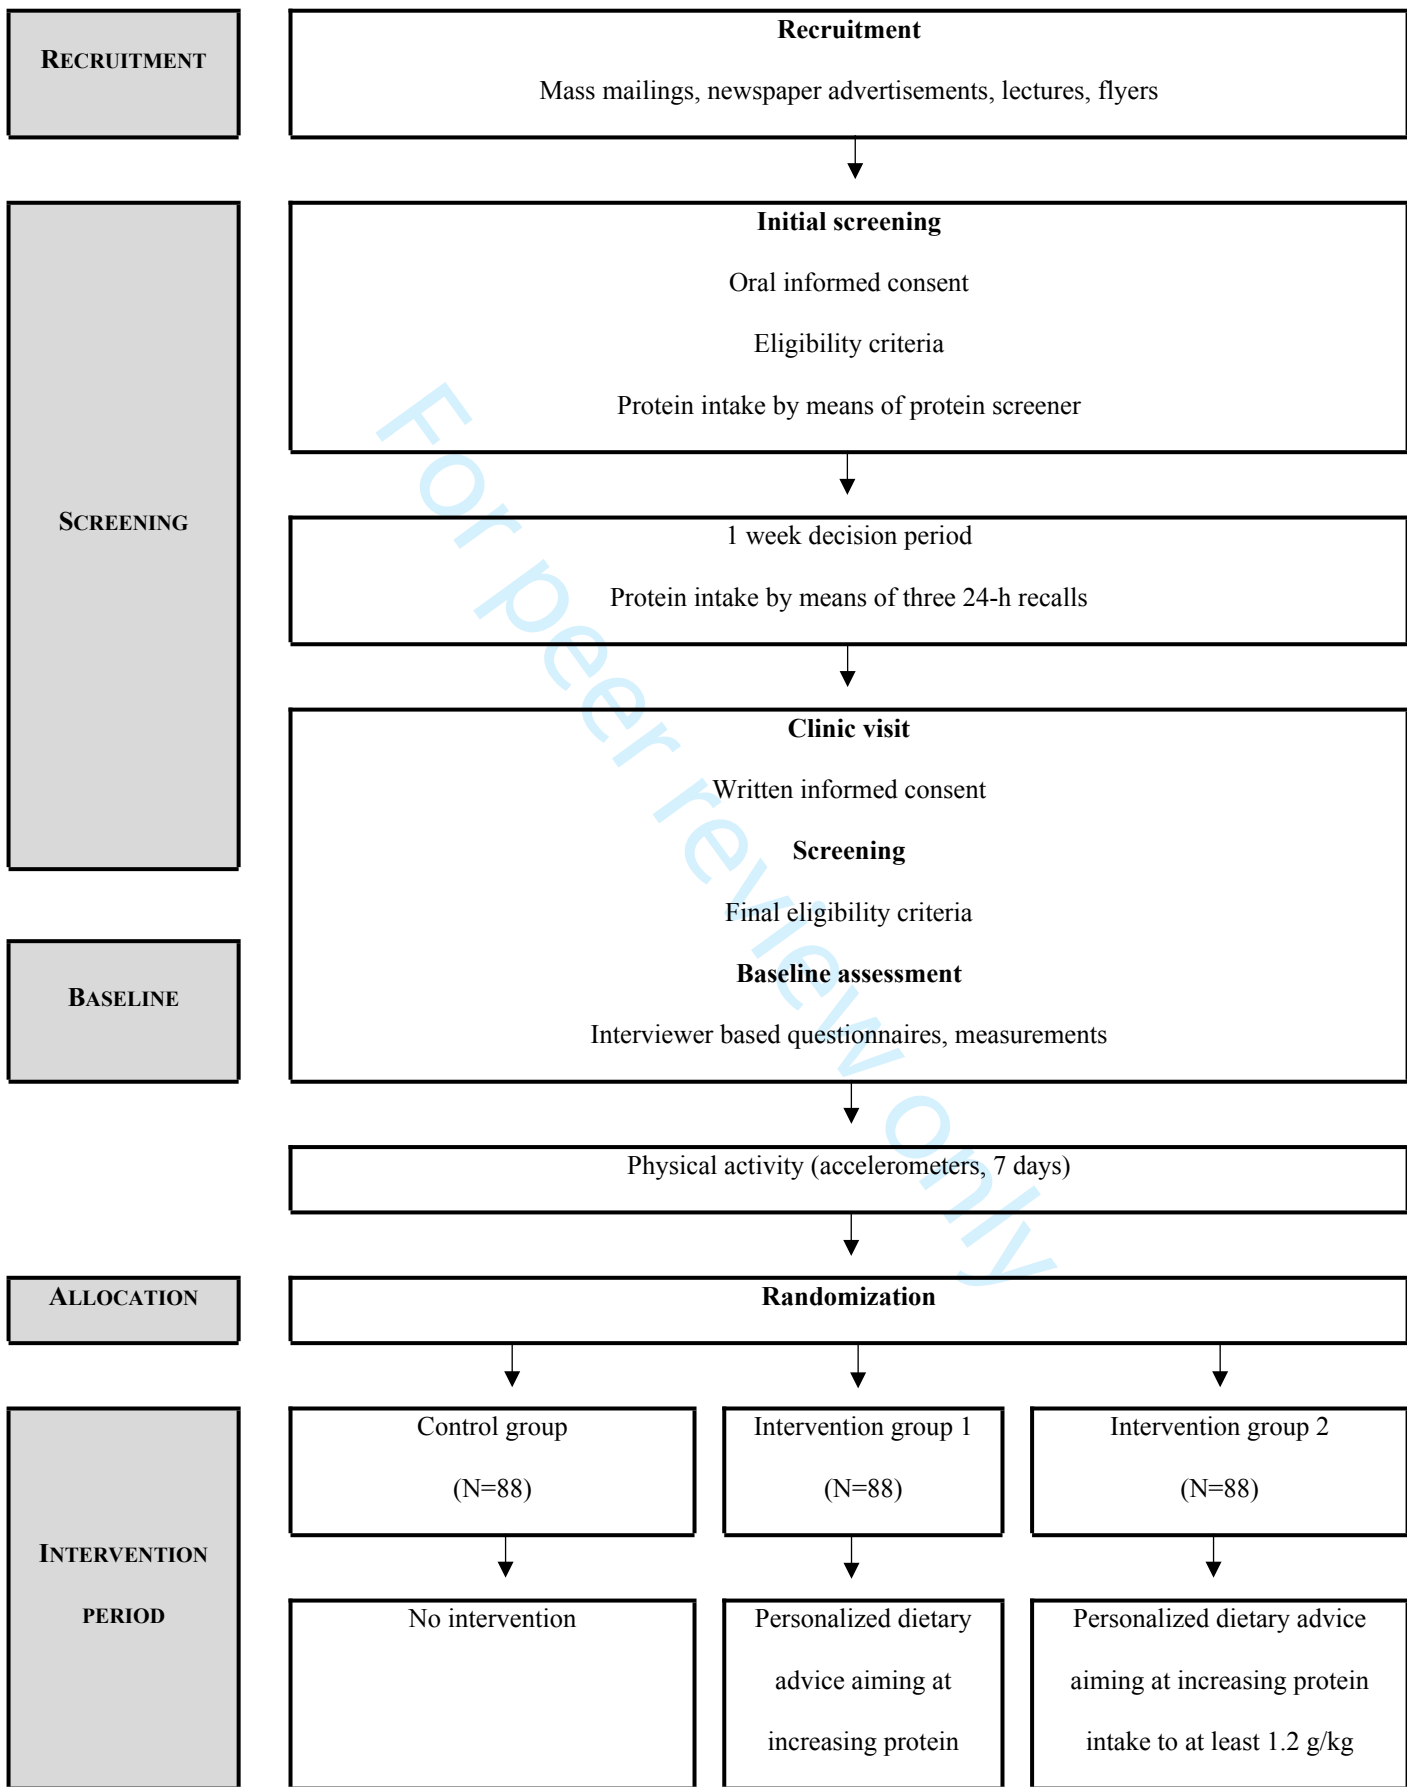

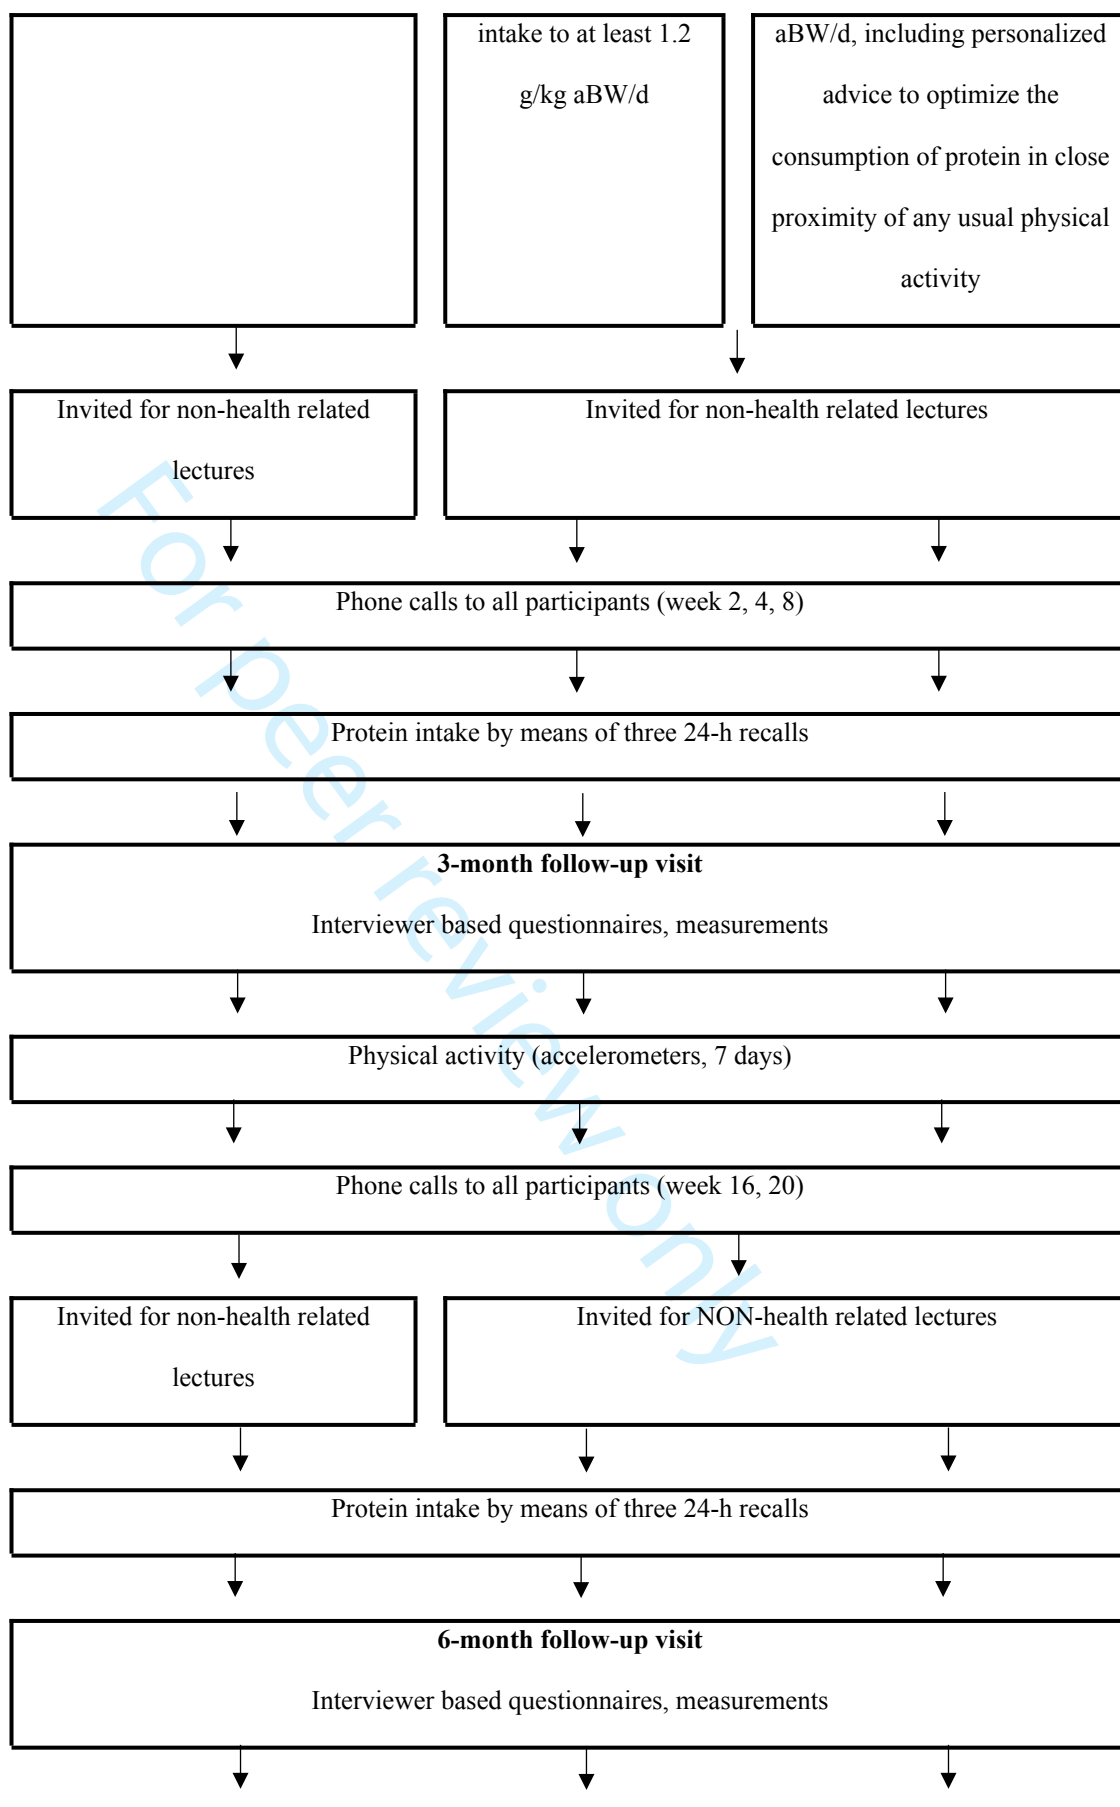

1  
2  
3  
4  
5  
6  
7  
8  
9  
10  
11  
12  
13  
14  
15  
16  
17  
18  
19  
20  
21  
22  
23  
24  
25  
26  
27  
28  
29  
30  
31  
32  
33  
34  
35  
36  
37  
38  
39  
40  
41  
42  
43  
44  
45  
46  
47  
48  
49  
50  
51  
52  
53  
54  
55  
56  
57  
58  
59  
60

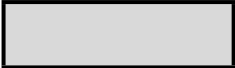

Physical activity (accelerometers, 7 days)

For peer review only



## Toestemmingsformulier proefpersoon

### Effectiviteit van het verhogen van eiwitname op fysiek functioneren

- Ik heb de informatiebrief gelezen. Ook kon ik vragen stellen. Mijn vragen zijn voldoende beantwoord. Ik had genoeg tijd om te beslissen of ik meedoe.
- Ik weet dat meedoen vrijwillig is. Ook weet ik dat ik op ieder moment kan beslissen om toch niet mee te doen of te stoppen met het onderzoek. Daarvoor hoef ik geen reden te geven.
- Ik geef toestemming voor het informeren van mijn huisarts dat ik meedoe aan dit onderzoek.
- Ik geef toestemming voor het informeren van mijn huisarts over eventuele afwijkingen die tijdens het onderzoek gevonden worden.
- Ik geef toestemming voor het opvragen van informatie bij mijn huisarts over mijn nierfunctie, mochten er twijfels over de effecten op mijn gezondheid bestaan.
- Ik weet dat sommige mensen mijn gegevens kunnen inzien. Die mensen staan vermeld in deze informatiebrief.
- Ik geef toestemming voor het verzamelen en gebruiken van mijn gegevens op de manier en voor de doelen die in de informatiebrief staan.
- Ik geef toestemming om mijn gegevens op de onderzoekslocatie nog 15 jaar na dit onderzoek te bewaren.
- Ik wil meedoen aan dit onderzoek.

Naam proefpersoon:

Handtekening:

Datum : \_\_ / \_\_ / \_\_

Ik verklaar dat ik deze proefpersoon volledig heb geïnformeerd over het genoemde onderzoek.

Als er tijdens het onderzoek informatie bekend wordt die de toestemming van de proefpersoon zou kunnen beïnvloeden, dan breng ik hem/haar daarvan tijdig op de hoogte.

Naam onderzoeker (of diens vertegenwoordiger):

Handtekening:

Datum: \_\_ / \_\_ / \_\_

## Appendix

### Appendix II

#### **PROMISS project coordination, Vrije Universiteit Amsterdam, Department of Health Sciences, the Netherlands**

Prof. Marjolein Visser, PhD – Principle investigator of the PROMISS project

Prof. Ingeborg A Brouwer, PhD – Project manager of the PROMISS project

Margreet Olthof, PhD – Financial manager of the PROMISS project

Rachel Vijlbrief – Assistant project manager of the PROMISS project

#### *Trial sites*

#### Vrije Universiteit Amsterdam, the Netherlands

Hanneke Wijnhoven, PhD - local principal investigator

Nanouk Bakker Schut – research intern

Judith Bosmans, PhD – researcher

Mariska Bout – dietician and research assistant

Ingeborg Brouwer, PhD – researcher

Nona Kerremans – research intern

Lothar Kuijper, PhD – researcher

Margreet Olthof, PhD – researcher

Ilse Reinders, PhD – local co-principal investigator

Marjon Veeke – dietician and research assistant

Rachel Vijlbrief – researcher

Marjolein Visser, PhD – researcher

Merel Vrijmoeth – dietician and research assistant

1  
2  
3 Laura Winkens – researcher  
4  
5  
6  
7

8 University of Helsinki  
9

10 Merja Suominen, PhD – local principal investigator  
11

12 Kirsi Ali-Kovero – research assistant  
13

14 Johannes Anttila – research intern  
15

16 Aliisa Hyvönen – dietician and research assistant  
17

18 Henriikka Jussila – research intern  
19

20 Satu Jyväkorpi, PhD – local co-principal investigator  
21

22 Riikka Niskanen – dietician and research assistant  
23

24 Anna-Maria Piipponen – research intern and research assistant  
25

26 Kaisu Pitkälä, PhD – researcher  
27

28 Heli Salmenius-Suominen – researcher  
29  
30  
31  
32  
33  
34

35 *Ancillary studies*  
36

37 Persuasive technology study  
38

39 Michel Klein, PhD – principal investigator of the persuasive technology study, *Vrije*  
40

41 *Universiteit Amsterdam, the Netherlands*  
42

43 Laura van der Lubbe – researcher, *Vrije Universiteit Amsterdam, the Netherlands*  
44  
45  
46  
47  
48

49 Microbiota study and fMRI study  
50

51 Fredrik Bäckhed, MD, PhD – researcher, *University of Gothenburg, Gothenburg, Sweden and*  
52

53 *University of Copenhagen, Copenhagen, Denmark*  
54

55 Kristien Fluitman, MD – researcher, *Amsterdam UMC, location VUmc, Amsterdam, the*  
56

57 *Netherlands*  
58  
59  
60

1  
2  
3 Richard Ijzerman, MD, PhD – researcher, *Amsterdam UMC, location VUmc, Amsterdam, the*  
4  
5 *Netherlands*  
6

7  
8 Bart Keijser, PhD – researcher, *TNO earth, Zeist, the Netherlands and Academic Center for*  
9  
10 *Dentistry Amsterdam, the Netherlands*  
11

12  
13 Max Nieuwdorp, MD, PhD – principal investigator of the microbiota study and fMRI study,  
14  
15 *Amsterdam UMC, location AMC and location VUmc, Amsterdam, the Netherlands*  
16

17  
18  
19  
20  
21  
22  
23  
24  
25  
26  
27  
28  
29  
30  
31  
32  
33  
34  
35  
36  
37  
38  
39  
40  
41  
42  
43  
44  
45  
46  
47  
48  
49  
50  
51  
52  
53  
54  
55  
56  
57  
58  
59  
60

For peer review only

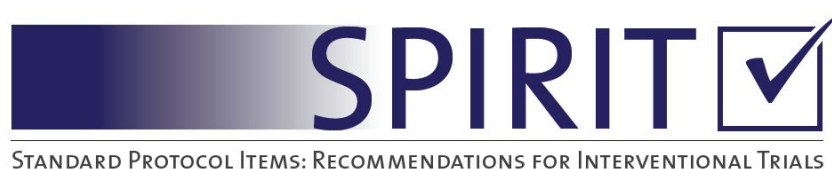

SPIRIT 2013 Checklist: Recommended items to address in a clinical trial protocol and related documents\*

| Section/item                      | ItemNo | Description                                                                                                                                                                                                                                                                              | Page number, section                                  |
|-----------------------------------|--------|------------------------------------------------------------------------------------------------------------------------------------------------------------------------------------------------------------------------------------------------------------------------------------------|-------------------------------------------------------|
| <b>Administrative information</b> |        |                                                                                                                                                                                                                                                                                          |                                                       |
| Title                             | 1      | Descriptive title identifying the study design, population, interventions, and, if applicable, trial acronym                                                                                                                                                                             | 1                                                     |
| Trial registration                | 2a     | Trial identifier and registry name. If not yet registered, name of intended registry                                                                                                                                                                                                     | 4; end of abstract, 8; study design, 31; trial status |
|                                   | 2b     | All items from the World Health Organization Trial Registration Data Set                                                                                                                                                                                                                 | N/A                                                   |
| Protocol version                  | 3      | Date and version identifier                                                                                                                                                                                                                                                              | 32; trial status                                      |
| Funding                           | 4      | Sources and types of financial, material, and other support                                                                                                                                                                                                                              | 30; funding                                           |
| Roles and responsibilities        | 5a     | Names, affiliations, and roles of protocol contributors                                                                                                                                                                                                                                  | 1, 31; author contributions                           |
|                                   | 5b     | Name and contact information for the trial sponsor                                                                                                                                                                                                                                       | -                                                     |
|                                   | 5c     | Role of study sponsor and funders, if any, in study design; collection, management, analysis, and interpretation of data; writing of the report; and the decision to submit the report for publication, including whether they will have ultimate authority over any of these activities | 30, 31; funding                                       |
|                                   | 5d     | Composition, roles, and responsibilities of the coordinating centre, steering committee, endpoint adjudication committee, data management team, and other individuals or groups overseeing the trial, if applicable (see Item 21a for data monitoring committee)                         | Appendix II                                           |

**Introduction**

|    |                                                           |     |                                                          |                   |
|----|-----------------------------------------------------------|-----|----------------------------------------------------------|-------------------|
| 1  |                                                           |     |                                                          |                   |
| 2  | Background and                                            | 6a  | Description of research question and justification for   | 5, 6, 7, 8        |
| 3  | rationale                                                 |     | undertaking the trial, including summary of relevant     |                   |
| 4  |                                                           |     | studies (published and unpublished) examining            |                   |
| 5  |                                                           |     | benefits and harms for each intervention                 |                   |
| 6  |                                                           |     |                                                          |                   |
| 7  |                                                           | 6b  | Explanation for choice of comparators                    | 7                 |
| 8  |                                                           |     |                                                          |                   |
| 9  | Objectives                                                | 7   | Specific objectives or hypotheses                        | 7; second         |
| 10 |                                                           |     |                                                          | paragraph         |
| 11 |                                                           |     |                                                          |                   |
| 12 | Trial design                                              | 8   | Description of trial design including type of trial (eg, | 8; study design   |
| 13 |                                                           |     | parallel group, crossover, factorial, single group),     |                   |
| 14 |                                                           |     | allocation ratio, and framework (eg, superiority,        |                   |
| 15 |                                                           |     | equivalence, noninferiority, exploratory)                |                   |
| 16 |                                                           |     |                                                          |                   |
| 17 |                                                           |     |                                                          |                   |
| 18 |                                                           |     |                                                          |                   |
| 19 | <b>Methods: Participants, interventions, and outcomes</b> |     |                                                          |                   |
| 20 | Study setting                                             | 9   | Description of study settings (eg, community clinic,     | 8; eligibility    |
| 21 |                                                           |     | academic hospital) and list of countries where data      | criteria, 9-11;   |
| 22 |                                                           |     | will be collected. Reference to where list of study      | recruitment and   |
| 23 |                                                           |     | sites can be obtained                                    | screening         |
| 24 |                                                           |     |                                                          |                   |
| 25 |                                                           |     |                                                          |                   |
| 26 | Eligibility criteria                                      | 10  | Inclusion and exclusion criteria for participants. If    | 8; eligibility    |
| 27 |                                                           |     | applicable, eligibility criteria for study centres and   | criteria          |
| 28 |                                                           |     | individuals who will perform the interventions (eg,      |                   |
| 29 |                                                           |     | surgeons, psychotherapists)                              |                   |
| 30 |                                                           |     |                                                          |                   |
| 31 |                                                           |     |                                                          |                   |
| 32 | Interventions                                             | 11a | Interventions for each group with sufficient detail to   | 13-15;            |
| 33 |                                                           |     | allow replication, including how and when they will      | intervention      |
| 34 |                                                           |     | be administered                                          |                   |
| 35 |                                                           |     |                                                          |                   |
| 36 |                                                           | 11b | Criteria for discontinuing or modifying allocated        | -                 |
| 37 |                                                           |     | interventions for a given trial participant (eg, drug    |                   |
| 38 |                                                           |     | dose change in response to harms, participant            |                   |
| 39 |                                                           |     | request, or improving/worsening disease)                 |                   |
| 40 |                                                           |     |                                                          |                   |
| 41 |                                                           |     |                                                          |                   |
| 42 |                                                           | 11c | Strategies to improve adherence to intervention          | 14; compliance    |
| 43 |                                                           |     | protocols, and any procedures for monitoring             |                   |
| 44 |                                                           |     | adherence (eg, drug tablet return, laboratory tests)     |                   |
| 45 |                                                           |     |                                                          |                   |
| 46 |                                                           | 11d | Relevant concomitant care and interventions that         | -                 |
| 47 |                                                           |     | are permitted or prohibited during the trial             |                   |
| 48 |                                                           |     |                                                          |                   |
| 49 | Outcomes                                                  | 12  | Primary, secondary, and other outcomes, including        | 16; primary       |
| 50 |                                                           |     | the specific measurement variable (eg, systolic          | outcome, 17-19;   |
| 51 |                                                           |     | blood pressure), analysis metric (eg, change from        | secondary         |
| 52 |                                                           |     | baseline, final value, time to event), method of         | outcomes, 19, 20; |
| 53 |                                                           |     | aggregation (eg, median, proportion), and time point     | other measures    |
| 54 |                                                           |     | for each outcome. Explanation of the clinical            |                   |
| 55 |                                                           |     | relevance of chosen efficacy and harm outcomes is        |                   |
| 56 |                                                           |     | strongly recommended                                     |                   |
| 57 |                                                           |     |                                                          |                   |
| 58 |                                                           |     |                                                          |                   |
| 59 |                                                           |     |                                                          |                   |
| 60 |                                                           |     |                                                          |                   |

|    |             |    |                                                      |                    |
|----|-------------|----|------------------------------------------------------|--------------------|
| 1  |             |    |                                                      |                    |
| 2  | Participant | 13 | Time schedule of enrolment, interventions (including | 12, 13; study      |
| 3  | timeline    |    | any run-ins and washouts), assessments, and visits   | timeline, Figure 1 |
| 4  |             |    | for participants. A schematic diagram is highly      |                    |
| 5  |             |    | recommended (see Figure)                             |                    |
| 6  |             |    |                                                      |                    |
| 7  | Sample size | 14 | Estimated number of participants needed to achieve   | 20; sample size    |
| 8  |             |    | study objectives and how it was determined,          |                    |
| 9  |             |    | including clinical and statistical assumptions       |                    |
| 10 |             |    | supporting any sample size calculations              |                    |
| 11 |             |    |                                                      |                    |
| 12 |             |    |                                                      |                    |
| 13 | Recruitment | 15 | Strategies for achieving adequate participant        | 9-11; recruitment  |
| 14 |             |    | enrolment to reach target sample size                | and screening      |
| 15 |             |    |                                                      |                    |

### Methods: Assignment of interventions (for controlled trials)

#### Allocation:

|    |                |     |                                                          |                 |
|----|----------------|-----|----------------------------------------------------------|-----------------|
| 16 |                |     |                                                          |                 |
| 17 |                |     |                                                          |                 |
| 18 |                |     |                                                          |                 |
| 19 |                |     |                                                          |                 |
| 20 | Sequence       | 16a | Method of generating the allocation sequence (eg,        | 11, 12          |
| 21 | generation     |     | computer-generated random numbers), and list of          | Randomization,  |
| 22 |                |     | any factors for stratification. To reduce predictability | allocation and  |
| 23 |                |     | of a random sequence, details of any planned             | masking         |
| 24 |                |     | restriction (eg, blocking) should be provided in a       |                 |
| 25 |                |     | separate document that is unavailable to those who       |                 |
| 26 |                |     | enrol participants or assign interventions               |                 |
| 27 |                |     |                                                          |                 |
| 28 |                |     |                                                          |                 |
| 29 |                |     |                                                          |                 |
| 30 | Allocation     | 16b | Mechanism of implementing the allocation sequence -      |                 |
| 31 | concealment    |     | (eg, central telephone; sequentially numbered,           |                 |
| 32 | mechanism      |     | opaque, sealed envelopes), describing any steps to       |                 |
| 33 |                |     | conceal the sequence until interventions are             |                 |
| 34 |                |     | assigned                                                 |                 |
| 35 |                |     |                                                          |                 |
| 36 |                |     |                                                          |                 |
| 37 | Implementation | 16c | Who will generate the allocation sequence, who will      | 12; second      |
| 38 |                |     | enrol participants, and who will assign participants to  | paragraph of    |
| 39 |                |     | interventions                                            | study time line |
| 40 |                |     |                                                          |                 |
| 41 | Blinding       | 17a | Who will be blinded after assignment to interventions    | 12;             |
| 42 | (masking)      |     | (eg, trial participants, care providers, outcome         | Randomization,  |
| 43 |                |     | assessors, data analysts), and how                       | allocation and  |
| 44 |                |     |                                                          | masking, 20;    |
| 45 |                |     |                                                          | statistical     |
| 46 |                |     |                                                          | analyses plan   |
| 47 |                |     |                                                          |                 |
| 48 |                |     |                                                          |                 |
| 49 |                | 17b | If blinded, circumstances under which unblinding is      | -               |
| 50 |                |     | permissible, and procedure for revealing a               |                 |
| 51 |                |     | participant's allocated intervention during the trial    |                 |
| 52 |                |     |                                                          |                 |
| 53 |                |     |                                                          |                 |

### Methods: Data collection, management, and analysis

|    |                            |     |                                                                                                                                                                                                                                                                                                                                                                                                              |                                                                                                                                |
|----|----------------------------|-----|--------------------------------------------------------------------------------------------------------------------------------------------------------------------------------------------------------------------------------------------------------------------------------------------------------------------------------------------------------------------------------------------------------------|--------------------------------------------------------------------------------------------------------------------------------|
| 1  |                            |     |                                                                                                                                                                                                                                                                                                                                                                                                              |                                                                                                                                |
| 2  | Data collection            | 18a | Plans for assessment and collection of outcome, baseline, and other trial data, including any related processes to promote data quality (eg, duplicate measurements, training of assessors) and a description of study instruments (eg, questionnaires, laboratory tests) along with their reliability and validity, if known. Reference to where data collection forms can be found, if not in the protocol | 12, 13; study timeline, 15; intervention fidelity, 16; primary outcome, 17, 18, 19; secondary outcomes, 19, 20; other measures |
| 3  | methods                    |     |                                                                                                                                                                                                                                                                                                                                                                                                              |                                                                                                                                |
| 4  |                            |     |                                                                                                                                                                                                                                                                                                                                                                                                              |                                                                                                                                |
| 5  |                            |     |                                                                                                                                                                                                                                                                                                                                                                                                              |                                                                                                                                |
| 6  |                            |     |                                                                                                                                                                                                                                                                                                                                                                                                              |                                                                                                                                |
| 7  |                            |     |                                                                                                                                                                                                                                                                                                                                                                                                              |                                                                                                                                |
| 8  |                            |     |                                                                                                                                                                                                                                                                                                                                                                                                              |                                                                                                                                |
| 9  |                            |     |                                                                                                                                                                                                                                                                                                                                                                                                              |                                                                                                                                |
| 10 |                            |     |                                                                                                                                                                                                                                                                                                                                                                                                              |                                                                                                                                |
| 11 |                            |     |                                                                                                                                                                                                                                                                                                                                                                                                              |                                                                                                                                |
| 12 |                            |     |                                                                                                                                                                                                                                                                                                                                                                                                              |                                                                                                                                |
| 13 |                            |     |                                                                                                                                                                                                                                                                                                                                                                                                              |                                                                                                                                |
| 14 |                            | 18b | Plans to promote participant retention and complete follow-up, including list of any outcome data to be collected for participants who discontinue or deviate from intervention protocols                                                                                                                                                                                                                    | -                                                                                                                              |
| 15 |                            |     |                                                                                                                                                                                                                                                                                                                                                                                                              |                                                                                                                                |
| 16 |                            |     |                                                                                                                                                                                                                                                                                                                                                                                                              |                                                                                                                                |
| 17 |                            |     |                                                                                                                                                                                                                                                                                                                                                                                                              |                                                                                                                                |
| 18 |                            |     |                                                                                                                                                                                                                                                                                                                                                                                                              |                                                                                                                                |
| 19 | Data                       | 19  | Plans for data entry, coding, security, and storage, including any related processes to promote data quality (eg, double data entry; range checks for data values). Reference to where details of data management procedures can be found, if not in the protocol                                                                                                                                            | 22; Data quality assurance and data management                                                                                 |
| 20 | management                 |     |                                                                                                                                                                                                                                                                                                                                                                                                              |                                                                                                                                |
| 21 |                            |     |                                                                                                                                                                                                                                                                                                                                                                                                              |                                                                                                                                |
| 22 |                            |     |                                                                                                                                                                                                                                                                                                                                                                                                              |                                                                                                                                |
| 23 |                            |     |                                                                                                                                                                                                                                                                                                                                                                                                              |                                                                                                                                |
| 24 |                            |     |                                                                                                                                                                                                                                                                                                                                                                                                              |                                                                                                                                |
| 25 |                            |     |                                                                                                                                                                                                                                                                                                                                                                                                              |                                                                                                                                |
| 26 |                            |     |                                                                                                                                                                                                                                                                                                                                                                                                              |                                                                                                                                |
| 27 | Statistical                | 20a | Statistical methods for analysing primary and secondary outcomes. Reference to where other details of the statistical analysis plan can be found, if not in the protocol                                                                                                                                                                                                                                     | 20, 21, 22; Statistical analyses plan                                                                                          |
| 28 | methods                    |     |                                                                                                                                                                                                                                                                                                                                                                                                              |                                                                                                                                |
| 29 |                            |     |                                                                                                                                                                                                                                                                                                                                                                                                              |                                                                                                                                |
| 30 |                            |     |                                                                                                                                                                                                                                                                                                                                                                                                              |                                                                                                                                |
| 31 |                            |     |                                                                                                                                                                                                                                                                                                                                                                                                              |                                                                                                                                |
| 32 |                            |     |                                                                                                                                                                                                                                                                                                                                                                                                              |                                                                                                                                |
| 33 |                            | 20b | Methods for any additional analyses (eg, subgroup and adjusted analyses)                                                                                                                                                                                                                                                                                                                                     | 20, 21, 22; Statistical analyses plan                                                                                          |
| 34 |                            |     |                                                                                                                                                                                                                                                                                                                                                                                                              |                                                                                                                                |
| 35 |                            |     |                                                                                                                                                                                                                                                                                                                                                                                                              |                                                                                                                                |
| 36 |                            |     |                                                                                                                                                                                                                                                                                                                                                                                                              |                                                                                                                                |
| 37 |                            |     |                                                                                                                                                                                                                                                                                                                                                                                                              |                                                                                                                                |
| 38 |                            | 20c | Definition of analysis population relating to protocol non-adherence (eg, as randomised analysis), and any statistical methods to handle missing data (eg, multiple imputation)                                                                                                                                                                                                                              | 20, 21, 22; Statistical analyses plan                                                                                          |
| 39 |                            |     |                                                                                                                                                                                                                                                                                                                                                                                                              |                                                                                                                                |
| 40 |                            |     |                                                                                                                                                                                                                                                                                                                                                                                                              |                                                                                                                                |
| 41 |                            |     |                                                                                                                                                                                                                                                                                                                                                                                                              |                                                                                                                                |
| 42 |                            |     |                                                                                                                                                                                                                                                                                                                                                                                                              |                                                                                                                                |
| 43 |                            |     |                                                                                                                                                                                                                                                                                                                                                                                                              |                                                                                                                                |
| 44 | <b>Methods: Monitoring</b> |     |                                                                                                                                                                                                                                                                                                                                                                                                              |                                                                                                                                |
| 45 | Data monitoring            | 21a | Composition of data monitoring committee (DMC); summary of its role and reporting structure; statement of whether it is independent from the sponsor and competing interests; and reference to where further details about its charter can be found, if not in the protocol. Alternatively, an explanation of why a DMC is not needed                                                                        | -                                                                                                                              |
| 46 |                            |     |                                                                                                                                                                                                                                                                                                                                                                                                              |                                                                                                                                |
| 47 |                            |     |                                                                                                                                                                                                                                                                                                                                                                                                              |                                                                                                                                |
| 48 |                            |     |                                                                                                                                                                                                                                                                                                                                                                                                              |                                                                                                                                |
| 49 |                            |     |                                                                                                                                                                                                                                                                                                                                                                                                              |                                                                                                                                |
| 50 |                            |     |                                                                                                                                                                                                                                                                                                                                                                                                              |                                                                                                                                |
| 51 |                            |     |                                                                                                                                                                                                                                                                                                                                                                                                              |                                                                                                                                |
| 52 |                            |     |                                                                                                                                                                                                                                                                                                                                                                                                              |                                                                                                                                |
| 53 |                            |     |                                                                                                                                                                                                                                                                                                                                                                                                              |                                                                                                                                |
| 54 |                            |     |                                                                                                                                                                                                                                                                                                                                                                                                              |                                                                                                                                |
| 55 |                            | 21b | Description of any interim analyses and stopping guidelines, including who will have access to these interim results and make the final decision to terminate the trial                                                                                                                                                                                                                                      | -                                                                                                                              |
| 56 |                            |     |                                                                                                                                                                                                                                                                                                                                                                                                              |                                                                                                                                |
| 57 |                            |     |                                                                                                                                                                                                                                                                                                                                                                                                              |                                                                                                                                |
| 58 |                            |     |                                                                                                                                                                                                                                                                                                                                                                                                              |                                                                                                                                |
| 59 |                            |     |                                                                                                                                                                                                                                                                                                                                                                                                              |                                                                                                                                |
| 60 |                            |     |                                                                                                                                                                                                                                                                                                                                                                                                              |                                                                                                                                |



|    |                                 |     |                                                                                                                                                                                                                                  |                                                                                                             |
|----|---------------------------------|-----|----------------------------------------------------------------------------------------------------------------------------------------------------------------------------------------------------------------------------------|-------------------------------------------------------------------------------------------------------------|
| 1  |                                 |     |                                                                                                                                                                                                                                  |                                                                                                             |
| 2  | Harms                           | 22  | Plans for collecting, assessing, reporting, and managing solicited and spontaneously reported adverse events and other unintended effects of trial interventions or trial conduct                                                | 22; Participants' safety                                                                                    |
| 3  |                                 |     |                                                                                                                                                                                                                                  |                                                                                                             |
| 4  |                                 |     |                                                                                                                                                                                                                                  |                                                                                                             |
| 5  |                                 |     |                                                                                                                                                                                                                                  |                                                                                                             |
| 6  |                                 |     |                                                                                                                                                                                                                                  |                                                                                                             |
| 7  | Auditing                        | 23  | Frequency and procedures for auditing trial conduct, if any, and whether the process will be independent from investigators and the sponsor                                                                                      | -                                                                                                           |
| 8  |                                 |     |                                                                                                                                                                                                                                  |                                                                                                             |
| 9  |                                 |     |                                                                                                                                                                                                                                  |                                                                                                             |
| 10 |                                 |     |                                                                                                                                                                                                                                  |                                                                                                             |
| 11 |                                 |     |                                                                                                                                                                                                                                  |                                                                                                             |
| 12 | <b>Ethics and dissemination</b> |     |                                                                                                                                                                                                                                  |                                                                                                             |
| 13 |                                 |     |                                                                                                                                                                                                                                  |                                                                                                             |
| 14 | Research ethics approval        | 24  | Plans for seeking research ethics committee/institutional review board (REC/IRB) approval                                                                                                                                        | 30; Ethics approval and consent to participate                                                              |
| 15 |                                 |     |                                                                                                                                                                                                                                  |                                                                                                             |
| 16 |                                 |     |                                                                                                                                                                                                                                  |                                                                                                             |
| 17 |                                 |     |                                                                                                                                                                                                                                  |                                                                                                             |
| 18 |                                 |     |                                                                                                                                                                                                                                  |                                                                                                             |
| 19 | Protocol amendments             | 25  | Plans for communicating important protocol modifications (eg, changes to eligibility criteria, outcomes, analyses) to relevant parties (eg, investigators, REC/IRBs, trial participants, trial registries, journals, regulators) | -                                                                                                           |
| 20 |                                 |     |                                                                                                                                                                                                                                  |                                                                                                             |
| 21 |                                 |     |                                                                                                                                                                                                                                  |                                                                                                             |
| 22 |                                 |     |                                                                                                                                                                                                                                  |                                                                                                             |
| 23 |                                 |     |                                                                                                                                                                                                                                  |                                                                                                             |
| 24 |                                 |     |                                                                                                                                                                                                                                  |                                                                                                             |
| 25 |                                 |     |                                                                                                                                                                                                                                  |                                                                                                             |
| 26 | Consent or assent               | 26a | Who will obtain informed consent or assent from potential trial participants or authorised surrogates, and how (see Item 32)                                                                                                     | 9, 10, 11 recruitment and screening, 12, 13; study timeline, 30; Ethics approval and consent to participate |
| 27 |                                 |     |                                                                                                                                                                                                                                  |                                                                                                             |
| 28 |                                 |     |                                                                                                                                                                                                                                  |                                                                                                             |
| 29 |                                 |     |                                                                                                                                                                                                                                  |                                                                                                             |
| 30 |                                 |     |                                                                                                                                                                                                                                  |                                                                                                             |
| 31 |                                 |     |                                                                                                                                                                                                                                  |                                                                                                             |
| 32 |                                 |     |                                                                                                                                                                                                                                  |                                                                                                             |
| 33 |                                 |     |                                                                                                                                                                                                                                  |                                                                                                             |
| 34 |                                 |     |                                                                                                                                                                                                                                  |                                                                                                             |
| 35 |                                 |     |                                                                                                                                                                                                                                  |                                                                                                             |
| 36 |                                 |     |                                                                                                                                                                                                                                  |                                                                                                             |
| 37 |                                 | 26b | Additional consent provisions for collection and use of participant data and biological specimens in ancillary studies, if applicable                                                                                            | 23, 24; Persuasive technology study, 24, 25, 26; Microbiota study, 26; fMRI study.                          |
| 38 |                                 |     |                                                                                                                                                                                                                                  |                                                                                                             |
| 39 |                                 |     |                                                                                                                                                                                                                                  |                                                                                                             |
| 40 |                                 |     |                                                                                                                                                                                                                                  |                                                                                                             |
| 41 |                                 |     |                                                                                                                                                                                                                                  |                                                                                                             |
| 42 |                                 |     |                                                                                                                                                                                                                                  |                                                                                                             |
| 43 |                                 |     |                                                                                                                                                                                                                                  |                                                                                                             |
| 44 |                                 |     |                                                                                                                                                                                                                                  |                                                                                                             |
| 45 | Confidentiality                 | 27  | How personal information about potential and enrolled participants will be collected, shared, and maintained in order to protect confidentiality before, during, and after the trial                                             | 22, 23; Data quality assurance and data management, 30; Consent for publication                             |
| 46 |                                 |     |                                                                                                                                                                                                                                  |                                                                                                             |
| 47 |                                 |     |                                                                                                                                                                                                                                  |                                                                                                             |
| 48 |                                 |     |                                                                                                                                                                                                                                  |                                                                                                             |
| 49 |                                 |     |                                                                                                                                                                                                                                  |                                                                                                             |
| 50 |                                 |     |                                                                                                                                                                                                                                  |                                                                                                             |
| 51 |                                 |     |                                                                                                                                                                                                                                  |                                                                                                             |
| 52 |                                 |     |                                                                                                                                                                                                                                  |                                                                                                             |
| 53 | Declaration of interests        | 28  | Financial and other competing interests for principal investigators for the overall trial and each study site                                                                                                                    | 30; Competing interests                                                                                     |
| 54 |                                 |     |                                                                                                                                                                                                                                  |                                                                                                             |
| 55 |                                 |     |                                                                                                                                                                                                                                  |                                                                                                             |
| 56 |                                 |     |                                                                                                                                                                                                                                  |                                                                                                             |
| 57 | Access to data                  | 29  | Statement of who will have access to the final trial dataset, and disclosure of contractual agreements that limit such access for investigators                                                                                  | 30; Availability of data and materials                                                                      |
| 58 |                                 |     |                                                                                                                                                                                                                                  |                                                                                                             |
| 59 |                                 |     |                                                                                                                                                                                                                                  |                                                                                                             |
| 60 |                                 |     |                                                                                                                                                                                                                                  |                                                                                                             |

|    |                   |     |                                                          |            |
|----|-------------------|-----|----------------------------------------------------------|------------|
| 1  |                   |     |                                                          |            |
| 2  | Ancillary and     | 30  | Provisions, if any, for ancillary and post-trial care,   | N/A        |
| 3  | post-trial care   |     | and for compensation to those who suffer harm from       |            |
| 4  |                   |     | trial participation                                      |            |
| 5  |                   |     |                                                          |            |
| 6  | Dissemination     | 31a | Plans for investigators and sponsor to communicate       | -          |
| 7  | policy            |     | trial results to participants, healthcare professionals, |            |
| 8  |                   |     | the public, and other relevant groups (eg, via           |            |
| 9  |                   |     | publication, reporting in results databases, or other    |            |
| 10 |                   |     | data sharing arrangements), including any                |            |
| 11 |                   |     | publication restrictions                                 |            |
| 12 |                   |     |                                                          |            |
| 13 |                   |     |                                                          |            |
| 14 |                   | 31b | Authorship eligibility guidelines and any intended       | -          |
| 15 |                   |     | use of professional writers                              |            |
| 16 |                   |     |                                                          |            |
| 17 |                   |     |                                                          |            |
| 18 |                   | 31c | Plans, if any, for granting public access to the full    | -          |
| 19 |                   |     | protocol, participant-level dataset, and statistical     |            |
| 20 |                   |     | code                                                     |            |
| 21 |                   |     |                                                          |            |
| 22 | <b>Appendices</b> |     |                                                          |            |
| 23 |                   |     |                                                          |            |
| 24 | Informed consent  | 32  | Model consent form and other related                     | Appendix I |
| 25 | materials         |     | documentation given to participants and authorised       |            |
| 26 |                   |     | surrogates                                               |            |
| 27 |                   |     |                                                          |            |
| 28 |                   |     |                                                          |            |
| 29 | Biological        | 33  | Plans for collection, laboratory evaluation, and         | N/A        |
| 30 | specimens         |     | storage of biological specimens for genetic or           |            |
| 31 |                   |     | molecular analysis in the current trial and for future   |            |
| 32 |                   |     | use in ancillary studies, if applicable                  |            |
| 33 |                   |     |                                                          |            |

\*It is strongly recommended that this checklist be read in conjunction with the SPIRIT 2013 Explanation & Elaboration for important clarification on the items. Amendments to the protocol should be tracked and dated. The SPIRIT checklist is copyrighted by the SPIRIT Group under the Creative Commons "[Attribution-NonCommercial-NoDerivs 3.0 Unported](https://creativecommons.org/licenses/by-nc-nd/3.0/)" license.

# BMJ Open

## Effectiveness and cost-effectiveness of personalized dietary advice aiming at increasing protein intake on physical functioning in community-dwelling older adults with lower habitual protein intake: rationale and design of the PROMISS randomized controlled trial

|                                 |                                                                                                                                                                                                                                                                                                                                                                                                                                                                                                                                                                                                                                                                                                                                                                         |
|---------------------------------|-------------------------------------------------------------------------------------------------------------------------------------------------------------------------------------------------------------------------------------------------------------------------------------------------------------------------------------------------------------------------------------------------------------------------------------------------------------------------------------------------------------------------------------------------------------------------------------------------------------------------------------------------------------------------------------------------------------------------------------------------------------------------|
| Journal:                        | <i>BMJ Open</i>                                                                                                                                                                                                                                                                                                                                                                                                                                                                                                                                                                                                                                                                                                                                                         |
| Manuscript ID                   | bmjopen-2020-040637.R1                                                                                                                                                                                                                                                                                                                                                                                                                                                                                                                                                                                                                                                                                                                                                  |
| Article Type:                   | Protocol                                                                                                                                                                                                                                                                                                                                                                                                                                                                                                                                                                                                                                                                                                                                                                |
| Date Submitted by the Author:   | 18-Sep-2020                                                                                                                                                                                                                                                                                                                                                                                                                                                                                                                                                                                                                                                                                                                                                             |
| Complete List of Authors:       | Reinders, Ilse; Vrije Universiteit Amsterdam, Wijnhoven, Hanneke; Vrije Universiteit Amsterdam<br>Jyvakorpi, S; University of Helsinki<br>Suominen, Merja; University of Helsinki<br>Niskanen, Riikka; University of Helsinki<br>Bosmans, J; Vrije Universiteit Amsterdam<br>Brouwer, Ingeborg; Vrije Universiteit Amsterdam<br>Fluitman, Kristien; Amsterdam UMC; University of Gothenburg<br>Klein, Michel; Vrije Universiteit Amsterdam<br>Kuijper, Lothar; Vrije Universiteit Amsterdam<br>van der Lubbe, Laura; Vrije Universiteit Amsterdam<br>Olthof, Margreet R.; Vrije Universiteit Amsterdam<br>Pitkala, Kaisu H.; University of Helsinki<br>van der Pols-Vijlbrief, Rachel ; Vrije Universiteit Amsterdam<br>Visser, Marjolein; Vrije Universiteit Amsterdam |
| <b>Primary Subject Heading</b>: | Nutrition and metabolism                                                                                                                                                                                                                                                                                                                                                                                                                                                                                                                                                                                                                                                                                                                                                |
| Secondary Subject Heading:      | Public health                                                                                                                                                                                                                                                                                                                                                                                                                                                                                                                                                                                                                                                                                                                                                           |
| Keywords:                       | GERIATRIC MEDICINE, NUTRITION & DIETETICS, PUBLIC HEALTH                                                                                                                                                                                                                                                                                                                                                                                                                                                                                                                                                                                                                                                                                                                |
|                                 |                                                                                                                                                                                                                                                                                                                                                                                                                                                                                                                                                                                                                                                                                                                                                                         |

SCHOLARONE™  
Manuscripts

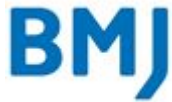

I, the Submitting Author has the right to grant and does grant on behalf of all authors of the Work (as defined in the below author licence), an exclusive licence and/or a non-exclusive licence for contributions from authors who are: i) UK Crown employees; ii) where BMJ has agreed a CC-BY licence shall apply, and/or iii) in accordance with the terms applicable for US Federal Government officers or employees acting as part of their official duties; on a worldwide, perpetual, irrevocable, royalty-free basis to BMJ Publishing Group Ltd ("BMJ") its licensees and where the relevant Journal is co-owned by BMJ to the co-owners of the Journal, to publish the Work in this journal and any other BMJ products and to exploit all rights, as set out in our [licence](#).

The Submitting Author accepts and understands that any supply made under these terms is made by BMJ to the Submitting Author unless you are acting as an employee on behalf of your employer or a postgraduate student of an affiliated institution which is paying any applicable article publishing charge ("APC") for Open Access articles. Where the Submitting Author wishes to make the Work available on an Open Access basis (and intends to pay the relevant APC), the terms of reuse of such Open Access shall be governed by a Creative Commons licence – details of these licences and which [Creative Commons](#) licence will apply to this Work are set out in our licence referred to above.

Other than as permitted in any relevant BMJ Author's Self Archiving Policies, I confirm this Work has not been accepted for publication elsewhere, is not being considered for publication elsewhere and does not duplicate material already published. I confirm all authors consent to publication of this Work and authorise the granting of this licence.

1  
2  
3 1 **Effectiveness and cost-effectiveness of personalized dietary advice aiming at increasing**  
4  
5 2 **protein intake on physical functioning in community-dwelling older adults with lower**  
6  
7 3 **habitual protein intake: rationale and design of the PROMISS randomized controlled**  
8  
9 4 **trial**

10  
11  
12 5  
13  
14 6 **Ilse Reinders<sup>1</sup>, Hanneke A.H. Wijnhoven<sup>1</sup>, Satu K. Jyväkorpi<sup>2</sup>, Merja H. Suominen<sup>2</sup>,**  
15  
16 7 **Riikka Niskanen<sup>2</sup>, Judith E. Bosmans<sup>1</sup>, Ingeborg A. Brouwer<sup>1</sup>, Kristien S. Fluitman<sup>3,4</sup>,**  
17  
18 8 **Michel C.A. Klein<sup>5</sup>, Lothar D. Kuijper<sup>1</sup>, Laura M. van der Lubbe<sup>5</sup>, Margreet R. Olthof<sup>1</sup>,**  
19  
20 9 **Kaisu H. Pitkälä<sup>2</sup>, Rachel Vijlbrief<sup>1</sup> and Marjolein Visser<sup>1</sup>.**  
21  
22  
23

24 10

25  
26 11 <sup>1</sup>Department of Health Sciences, Faculty of Science, and the Amsterdam Public Health  
27  
28 12 research institute, Vrije Universiteit Amsterdam, The Netherlands; <sup>2</sup>University of Helsinki,  
29  
30 13 Department of General Practice and Primary Health Care, and Helsinki University Central  
31  
32 14 Hospital, Unit of Primary Health Care, Finland; <sup>3</sup>Department of Internal Medicine,  
33  
34 15 Amsterdam UMC, Vrije Universiteit Amsterdam, Amsterdam Public Health research  
35  
36 16 institute, Amsterdam, The Netherlands; <sup>4</sup>Wallenburg Laboratory, Department of Molecular  
37  
38 17 and Clinical Medicine, Sahlgrenska Academy, University of Gothenburg, Gothenburg,  
39  
40 18 Sweden; <sup>5</sup>Department of Computer Science, Vrije Universiteit Amsterdam, Amsterdam, the  
41  
42 19 Netherlands.  
43  
44  
45  
46

47 20

48  
49 21 Corresponding author:

50  
51 22 Ilse Reinders

52  
53 23 Vrije Universiteit Amsterdam

54  
55 24 De Boelelaan 1105, room O-526

56  
57 25 1081 HV Amsterdam  
58  
59  
60

1  
2  
3  
4  
5  
6  
7  
8  
9  
10  
11  
12  
13  
14  
15  
16  
17  
18  
19  
20  
21  
22  
23  
24  
25  
26  
27  
28  
29  
30  
31  
32  
33  
34  
35  
36  
37  
38  
39  
40  
41  
42  
43  
44  
45  
46  
47  
48  
49  
50  
51  
52  
53  
54  
55  
56  
57  
58  
59  
60

26 The Netherlands

27 ilse.reinders@vu.nl

28 Tel: +31205982467

29

30 **Total word count: 7855**

For peer review only

1  
2  
3 31 **Abstract**  
4

5 32 **Introduction:** Short-term metabolic and observational studies suggest that protein intake  
6  
7  
8 33 above the recommended dietary allowance of 0.83 g/kg body weight (BW)/d may support  
9  
10 34 preservation of lean body mass and physical function in old age, but evidence from  
11  
12 35 randomized controlled trials is inconclusive.

13  
14 36 **Methods and analysis:** The PRevention Of Malnutrition In Senior Subjects in the EU  
15  
16  
17 37 (PROMISS) trial examines the effect of personalized dietary advice aiming at increasing  
18  
19 38 protein intake with or without advice regarding timing of protein intake to close proximity of  
20  
21 39 usual physical activity, on change in physical functioning after 6 months among community-  
22  
23 40 dwelling older adults ( $\geq 65$  y) with a habitual protein intake of  $< 1.0$  g/kg adjusted (a)BW/d.  
24  
25 41 Participants (n=264) will be recruited in Finland and the Netherlands, and will be randomized  
26  
27 42 into three groups; two intervention groups and one control group. Intervention group 1  
28  
29 43 (n=88) receives personalized dietary advice and protein enriched food products in order to  
30  
31 44 increase their protein intake to at least 1.2 g/kg aBW/d. Intervention group 2 (n=88) receives  
32  
33 45 the same advice as described for intervention group 1, and in addition advice to consume 7.5-  
34  
35 46 10 g protein through protein (en)rich(ed) foods within half an hour after performing usual  
36  
37 47 physical activity. The control group (n=88) receives no intervention. All participants will be  
38  
39 48 invited to attend lectures not related to health. The primary outcome is 6-months change in  
40  
41 49 physical functioning measured by change in walk time using a 400-m walk test. Secondary  
42  
43 50 outcomes are: 6-months change in the Short Physical Performance Battery score, muscle  
44  
45 51 strength, body composition, self-reported mobility limitations, quality of life, incidence of  
46  
47 52 frailty, incidence of sarcopenia risk and incidence of malnutrition. We also investigate cost-  
48  
49 53 effectiveness by change in health care costs.  
50  
51  
52  
53

54 54 **Discussion:** The PROMISS trial will provide evidence whether increasing protein intake, and  
55  
56 55 additionally optimizing the timing of protein intake, has a positive effect on the course of  
57  
58  
59  
60

1  
2  
3 56 physical functioning after 6 months among community-dwelling older adults with a habitual  
4  
5 57 protein intake of < 1.0 g/kg aBW/d.  
6  
7

8 58 **Ethics and disseminations:** The study has been approved by the Ethics Committee of the  
9  
10 59 Helsinki University Central Hospital, Finland (ID of the approval; HUS/1530/2018) and The  
11  
12 60 Medical Ethical Committee of the Amsterdam UMC, location VUmc, Amsterdam, the  
13  
14 61 Netherlands (ID of the approval; 2018.399). All participants provided written informed  
15  
16 62 consent prior to being enrolled onto the study. Results will be submitted for publication in  
17  
18 63 peer-reviewed journals and will be made available to stakeholders (i.e. older adults, health  
19  
20 64 care professionals and industry).  
21  
22  
23  
24  
25

#### 26 66 **Trial status**

27  
28 67 The Trial was registered in ClinicalTrials.gov. Title of registration: The (Cost)Effectiveness  
29  
30 68 of Increasing Protein Intake on Physical Functioning in Older Adults. Number of  
31  
32 69 identification: NCT03712306. Registered 19 October 2018. Recruitment commenced in  
33  
34 70 October 2018 and ended in November 2019.  
35  
36  
37  
38  
39

40 72 **Keywords:** older adults, protein intake, physical functioning, RCT, malnutrition, protein  
41  
42 73 recommendation, 400 meter walk.  
43  
44  
45  
46  
47  
48  
49  
50  
51  
52  
53  
54  
55  
56  
57  
58  
59  
60



1  
2  
3 74 **Strength and limitations of this study**  
4

- 5 75 • This large randomized controlled trial addresses a key question whether dietary advice  
6 to increase protein intake to  $\geq 1.2$  g/kg adjusted body weight (aBW)/d is beneficial for  
7 physical functioning in community-dwelling older adults.  
8 76  
9  
10 77  
11  
12 78 • This trial will also examine the additional effect of the timing of protein intake in close  
13 proximity of usual physical activity on change in physical functioning.  
14 79  
15  
16 80 • Participants included had a habitual protein intake of  $< 1.0$  g/kg aBW/d.  
17  
18 81 • The lack of blinding of the study participants and nutritionists who also collect data on  
19 all outcome measures is a limitation of the study design.  
20 82  
21  
22 83 • Another limitation of this study is that the biological value of the total protein intake (i.e.  
23 type of amino acids) is unknown.  
24 84  
25  
26  
27  
28  
29  
30  
31  
32  
33  
34  
35  
36  
37  
38  
39  
40  
41  
42  
43  
44  
45  
46  
47  
48  
49  
50  
51  
52  
53  
54  
55  
56  
57  
58  
59  
60

## 85 Introduction

86 There is an ongoing debate on whether or not older adults should be recommended a protein  
87 intake above the current recommended daily allowance (RDA) established by the European  
88 Food Safety Authority (EFSA) of 0.83 g/kg body weight (BW)/d for adults (1). International  
89 panels of geriatricians, nutritional experts and scientists have proposed at least 1.0-1.2 g  
90 protein/kg BW/d for healthy older adults in order to maintain and regain muscle mass,  
91 strength and function (2, 3).

92 The proposed increase of the RDA for older adults is merely based on results from  
93 short term metabolic and epidemiological studies. Several metabolic studies showed that  
94 older adults ( $\geq 65$  y) have a lower muscle protein synthesis (MPS) following protein intake  
95 compared to younger adults (4-6), and that higher protein intake enhances MPS in older  
96 adults when compared to lower protein intake (1.2 g/kg BW/d vs. 0.8 g/kg BW/d (7), or  $\geq 30$   
97 g/d vs. 15 g/d (8)). In addition, the anabolic threshold (i.e. optimal dose of dietary protein in a  
98 meal that stimulates MPS) is 70% higher in older compared to younger adults (5).  
99 Epidemiological studies have shown that higher dietary protein intake in older adults, defined  
100 as  $> 0.9$  g/kg BW/d (9) or  $> 1.0$  g/kg BW/d (10-12) is associated with lower risk of weight  
101 loss (11), better disability trajectories (12), less loss of lean mass (9), or lower risk of  
102 developing functional impairments (10).

103 Despite the evidence from metabolic and epidemiological studies, causal evidence to  
104 support beneficial effects of protein intake at or above 1.0 g/kg BW/d based on randomized  
105 controlled trials (RCTs) is not conclusive. One systematic review showed no beneficial effect  
106 of increasing protein intake on lean body mass, muscle cross-sectional area, muscle strength,  
107 or physical performance (13). Of the 36 studies included in the systematic review, 26 studies  
108 presented mean habitual protein intake of the study participants which ranged between 0.78  
109 and 1.5 g/kg BW/d, with only one study below the protein RDA of 0.8 g/kg BW/d (13). The

1  
2  
3 110 relatively high mean habitual protein intake may explain the absence of a beneficial effect of  
4  
5 111 additional protein. Another explanation may be that the amount of protein provided might not  
6  
7 112 have been sufficient to augment MPS. I.e. a protein intake of 25 – 30 g is required to  
8  
9 113 stimulate MPS and maintain muscle mass (14, 15), though the amounts provided varied  
10  
11 114 between 10 g/d (3d/wk) and total intake of 125 g/day or were not reported. Of the trials  
12  
13 115 published after the systematic review, Park et al. showed that intake of 1.5 g/kg BW/d for 12  
14  
15 116 weeks resulted in higher muscle mass and improved gait speed compared to intake of 0.8  
16  
17 117 g/kg BW/d in undernourished pre-frail and frail older adults (16). Ten Haaf et al. showed a  
18  
19 118 positive effect of increasing protein intake for 12 weeks on lean body mass in active older  
20  
21 119 adults with a habitual protein intake of < 1.0 g/kg BW/d (17). Beelen et al. found no effects  
22  
23 120 of protein supplementation on physical performance among older adults after hospital  
24  
25 121 discharge (18), however, baseline protein intake was already 1.0 g/kg BW/d in the control  
26  
27 122 group and 1.5 g/kg BW/d in the intervention group. Finally, Bhasin et al. showed no  
28  
29 123 beneficial effects other than a decrease in fat mass after a controlled diet with 1.3 g/kg BW/d  
30  
31 124 of protein for 6 months compared to a control diet consisting of 0.8 g protein /kg BW/d (19)  
32  
33 125 among functionally limited community-dwelling men aged  $\geq 65$  years. However, mean BMI  
34  
35 126 of the participants was quite high (30.3 kg/m<sup>2</sup>), which may have resulted in an overestimation  
36  
37 127 of baseline protein requirements. Based on inconsistent findings, more RCTs in older adults  
38  
39 128 with lower habitual protein intake are needed to determine the potential effect of increasing  
40  
41 129 protein intake on physical functioning outcomes.

42  
43  
44  
45  
46  
47  
48  
49 130 Previous studies among older adults showed that protein supplementation in  
50  
51 131 combination with resistance exercise has more beneficial effects on body composition,  
52  
53 132 muscle strength and physical function compared to resistance exercise alone (20-26). The  
54  
55 133 underlying hypothesis is that protein supplementation augments the adaptive response of  
56  
57 134 skeletal muscle to resistance exercise. In addition, there is evidence that timing of protein  
58  
59  
60

1  
2  
3 135 intake in close proximity of physical activity stimulated MPS to greater extent than when  
4  
5 136 timed at other hours during the day (27). To our knowledge, there are no RCTs investigating  
6  
7 137 the effect of timing protein intake in close proximity of physical activities on physical  
8  
9  
10 138 functioning.

11  
12 139 The PROMISS trial is designed to fill in some of the current knowledge gaps on the  
13  
14 140 optimal amount of dietary protein in older community-dwelling adults and timing of protein  
15  
16 141 intake in relation to physical activity. Its primary objective is to examine the effectiveness of  
17  
18 142 personalized dietary advice aiming at increasing protein intake to at least 1.2 g/kg adjusted  
19  
20 143 (a)BW/d on change in physical functioning after 6 months measured by change in walk time  
21  
22 144 using a 400-m walk test among community-dwelling older adults with a habitual protein  
23  
24 145 intake of < 1.0 g/kg aBW/d. Additionally, it examines the combined effect of personalized  
25  
26 146 dietary advice aiming at increasing protein intake to at least 1.2 g/kg aBW/d and advice  
27  
28 147 aiming at optimizing the timing of protein intake in close proximity of usual physical activity.  
29  
30  
31 148 The secondary objectives are to examine the effectiveness of personalized dietary advice  
32  
33 149 aiming at increasing protein intake to at least 1.2 g/kg adjusted on 6-month changes in  
34  
35 150 physical functioning measured by the Short Physical Performance Battery (SPPB) score,  
36  
37 151 muscle strength, body composition, self-reported mobility limitations, quality of life,  
38  
39 152 incidence of frailty, incidence of sarcopenia risk, and incidence of malnutrition and change in  
40  
41 153 health care costs.

42  
43  
44  
45  
46 154 In three ancillary studies the following additional objectives are addressed; 1) the  
47  
48 155 effect of using persuasive technology on adherence to personalized dietary advice aiming at  
49  
50 156 increasing protein to at least 1.2 g/kg aBW/d, 2) the effect of personalized dietary advice  
51  
52 157 aiming at increasing protein intake to at least 1.2 g/kg aBW/d on the oral and gut microbiota  
53  
54 158 composition, and 3) the effect of personalized dietary advice aiming at increasing protein  
55  
56  
57  
58  
59  
60

1  
2  
3 159 intake to at least 1.2 g/kg aBW/d on central neural responses to food-cues in brain areas of  
4  
5 160 interest.  
6  
7

8 161

9  
10 162 **Methods and analysis**

11  
12 163 *Study design*

13  
14 164 The PROMISS trial is a multicentre randomized controlled trial (ClinicalTrials.gov identifier:  
15  
16  
17 165 NCT03712306) designed to examine the effectiveness of personalized dietary advice aiming  
18  
19 166 at increasing protein intake and advice on optimizing the timing of protein intake in close  
20  
21 167 proximity of usual physical activity on change in physical functioning after 6 months.

22  
23 168 Participants will be randomised into three groups: one control group (no intervention);  
24  
25  
26 169 intervention group 1) receiving personalized dietary advice aiming at increasing protein  
27  
28 170 intake to at least 1.2 g/kg aBW/d; and intervention group 2) receiving personalized dietary  
29  
30 171 advice aiming at increasing protein intake to at least 1.2 g/kg aBW/d, including personalized  
31  
32 172 advice to optimize the timing of protein intake in close proximity of usual physical activity.  
33  
34

35 173

36  
37 174 *Eligibility criteria*

38  
39 175 The eligibility criteria are proposed to include a study group of community-dwelling older  
40  
41 176 adults (65+) with a habitual protein intake < 1.0 g/kg aBW/d. Inclusion and exclusion criteria  
42  
43 177 are listed in Table 1, and some are described in more detail below.  
44  
45  
46

47 178  
48  
49  
50  
51  
52  
53  
54  
55  
56  
57  
58  
59  
60

179 **Table 1.** Eligibility criteria for participation of the PROMISS trial

---

**Inclusion criteria**


---

Community-dwelling

Age  $\geq$  65 yearsHabitual protein intake  $<$  1.0 g protein/kg aBW/dBMI  $\geq$  18.5 kg/m<sup>2</sup> and  $\leq$  32.0 kg/m<sup>2</sup> (based on measured weight and height)

Ability to walk 400 meters within 15 minutes, without the use of a walker and no rest longer than 60 seconds

---

**Exclusion criteria**


---

Inability or unwillingness to provide informed consent

Not able to eat independently (self-reported)

Not able to speak, write and read the local language (Finnish or Dutch)

Current participation in supervised behavioural or lifestyle intervention that intervenes with the PROMISS trial

Not able to visit the research site in the following next 6 months

Bedridden, wheelchair bound or always being inside

Diagnosis of severe kidney disease (self-reported)

Parkinson's disease (self-reported)

Diagnosis of type I diabetes mellitus (self-reported)

Diagnosis of type II diabetes mellitus and requiring use of insulin started within 6 months (self-reported)

Current treatment of cancer (with the exception of basal cell carcinoma)

Vegan diet

Severe allergies to certain food product (peanut, gluten)

Diagnosis of an eating disorder (self-reported)

Purposefully lost/gained > 3 kg in the past three months

Heart problems in the past three months, defined as heart attack, angioplasty, heart surgery, stroke, severe shortness of breath during physical activity (self-reported)

Alcohol abuse during past 6 months, defined as the AUDIT-C score  $\geq 3$  (28)

Low cognitive status, defined as the MMSE score  $\leq 20$  (29)

---

180 Abbreviations: aBW; adjusted body weight, BMI; Body Mass Index, MMSE; Mini-Mental

181 State Examination.

182

183 Older adults with a BMI of  $< 18.5$  kg/m<sup>2</sup> will be excluded, because these participants are  
184 likely to be undernourished (30) and should preferably receive general nutritional care that is  
185 not provided in this trial. Those with a BMI of  $> 32.0$  kg/m<sup>2</sup> will be also excluded, because a  
186 high BMI ( $> 30.0$  kg/m<sup>2</sup>) is associated with poorer physical function (31) and disability (32)  
187 in old age and intentional weight loss by lifestyle interventions lead to a reduced mortality  
188 risk (33). In light of this evidence, older adults with a BMI  $> 32.0$  kg/m<sup>2</sup> should preferably be  
189 advised to lose weight, which is not the aim of the present study and may interfere with the  
190 study objective. Because participants of intervention group 2 will be advised to consume  
191 protein rich foods in close proximity of usual physical activity, older adults who are  
192 bedridden, wheelchair bound or do not go outside will be excluded from the trial. Older  
193 adults with a diagnosis of severe kidney disease (i.e. treatment of a nephrologist and/or  
194 protein-restricted diet, self-reported) will also be excluded as they should be advised to limit  
195 their protein intake (2, 34-36). Older adults with a low cognitive status (Mini-Mental State  
196 Examination (MMSE) score  $\leq 20$  (29)) will be excluded, as participants should be able to  
197 understand and follow dietary advice if randomized to one of the intervention groups.

198

199 Calculation of protein intake using adjusted body weight

1  
2  
3 200 To calculate habitual protein intake in g/kg aBW/d for all (potential) participants and  
4  
5 201 recommended protein intake (participants in the two intervention groups), we apply adjusted  
6  
7 202 BW depending on participants' age and BMI. We use adjusted body weight because  
8  
9  
10 203 underweight persons require extra protein to build muscle tissue, while in overweight  
11  
12 204 persons, much 'extra weight' is adipose tissue. Protein intake in g/kg aBW/d is based on self-  
13  
14 205 reported BW during screening and afterwards based on measured BW during the baseline  
15  
16 206 assessment, which is further used throughout the study. For those with a BMI > 25.0 to 32.0  
17  
18 207 kg/m<sup>2</sup> (age ≤ 70 y) or > 27.0 to 32.0 kg/m<sup>2</sup> (age > 70 y) we apply aBW corresponding to a  
19  
20 208 BMI of respectively 25.0 or 27.0 kg/m<sup>2</sup>. For those with a BMI > 18.5 to < 22.0 kg/m<sup>2</sup> (age >  
21  
22 209 70 y) we apply aBW corresponding to a BMI of respectively 18.5 or 22.0 kg/m<sup>2</sup> (37). For the  
23  
24 210 recommended protein intake, we apply adjusted BW which is based on baseline measured  
25  
26 211 BW.  
27  
28  
29  
30  
31  
32

### 33 213 *Recruitment and screening*

34  
35 214 Two hundred and sixty-four community-dwelling adults aged 65 years and older will be  
36  
37 215 recruited at two study sites (metropolitan area of Finland including Helsinki, Espoo, Vantaa,  
38  
39 216 Kauniainen, and Amsterdam, the Netherlands). The recruitment strategy includes mass  
40  
41 217 mailing using addresses obtained from a random sample of the Finnish Population Registry  
42  
43 218 (in Finland only), newspaper advertisements, media coverage, lectures, oral presentations to  
44  
45 219 the target group, informing professionals working with older adults and flyers which will be  
46  
47 220 distributed at locations where many community-dwelling older adults visit.  
48  
49  
50

51 221 Older adults who are interested in participating will be asked to contact the local  
52  
53 222 PROMISS research team (by phone or by e-mail). Thereafter, screening by phone takes  
54  
55 223 place, only when verbal informed consent is given, in which the majority of the eligibility  
56  
57 224 criteria will be assessed along with an explanation of the study. Only those with a lower  
58  
59  
60



1  
2  
3 225 habitual protein intake ( $< 1.0$  g/kg aBW/d) will be invited for the first clinic visit. Assessment  
4  
5 226 of habitual protein intake will be estimated in two steps: 1) initial screening by phone; 2) a  
6  
7 227 full dietary assessment based on a combination of three food diaries and three 24-h dietary  
8  
9 228 recalls to confirm lower habitual protein intake. Step 1, the initial screening is performed by  
10  
11 229 phone using the Protein Screener 55+ (Pro55+, available for use in English, Finnish and  
12  
13 230 Dutch: see [www.proteinscreener.nl/#/](http://www.proteinscreener.nl/#/)). This screening tool was specifically developed and  
14  
15 231 validated for this purpose (38). The screening results in a probability score (0-100%) of  
16  
17 232 having a protein intake below 1.0 g/kg aBW/d. At a probability of  $> 30\%$ , sensitivity and  
18  
19 233 specificity are optimally balanced (38). In the PROMISS trial we select persons with a  
20  
21 234 probability score varying between  $> 15\%$  (when initial response rates to recruitment  
22  
23 235 strategies are low) and  $> 30\%$  (when initial response rates are high), for the second step of  
24  
25 236 assessing habitual protein intake. Those who fulfill the eligibility criteria receive further  
26  
27 237 information on the study and a food diary with a booklet with pictures of portion sizes by post  
28  
29 238 to support the 24-h dietary recalls. After a minimum of one week of consideration, the  
30  
31 239 research staff contacts the older adults, and among those who are still willing to participate  
32  
33 240 the full dietary assessment will take place (step 2). These potential participants will be asked  
34  
35 241 to keep track of their dietary intake by filling out the provided food diary for three  
36  
37 242 consecutive days (three weekdays; or two weekdays and one weekend day). The booklet with  
38  
39 243 pictures of portion sizes that they received earlier will help them accurately filling out the  
40  
41 244 diary. Each day after, they will be called by a nutritionist to go through their food diary of the  
42  
43 245 day before (24-h dietary recall). Potential participants are asked whether these days are  
44  
45 246 representative for their habitual diet. In case one of the three days is not representative, mean  
46  
47 247 protein intake is based on two instead of three days. In case of more than one non-  
48  
49 248 representative day, the person will be excluded. The food intake data based on the 24-h  
50  
51 249 dietary recall will be entered into the program 'Fineli' for the Finnish data (39) and into the  
52  
53  
54  
55  
56  
57  
58  
59  
60

1  
2  
3 250 program 'Eetmeter' of the Dutch Nutrition Center using an extended version of the Dutch  
4  
5 251 Food Composition Table of 2016 for the Dutch data (40) to calculate intake of macronutrients  
6  
7 252 and micronutrients (vitamin D and vitamin B12). Participants with an actual protein intake  $\geq$   
8  
9 253 1.0 g/kg aBW/d (based on self-reported BW) will be excluded.

10  
11  
12 254 Potential participants with a mean habitual protein intake  $< 1.0$  g/kg aBW/d (based on  
13  
14 255 the three 24-h dietary recalls), will be invited for the clinic visit, where final eligibility  
15  
16 256 criteria will be assessed; MMSE  $> 20$ , ability to walk 400 m within 15 minutes (the use of a  
17  
18 257 cane is allowed, but without the use of a walker and no rest longer than 60 seconds), and BMI  
19  
20 258 of  $\geq 18.5$  kg/m<sup>2</sup> and  $\leq 32.0$  kg/m<sup>2</sup> based on measured BW and body height. When all  
21  
22 259 eligibility criteria are met, participants are included in the PROMISS trial.  
23  
24  
25

26  
27 260

28 261 *Randomization, allocation and masking*

29  
30 262 Randomization by means of a stratified block randomization procedure will be performed by  
31  
32 263 an independent statistician. Participants will be allocated in a 1:1:1 ratio to the three groups.  
33  
34 264 The size of the randomization blocks is three. Participants will be stratified according to their  
35  
36 265 baseline habitual protein intake ( $< 0.9$  or  $0.9-1.0$  g/kg aBW/d) and sex to ensure  
37  
38 266 homogeneous distribution of baseline habitual protein intake and sex in the three groups  
39  
40 267 across the two recruitment sites, because there may be a different intervention effect by  
41  
42 268 baseline habitual protein or sex. In case couples are eligible we will allocate them to the same  
43  
44 269 intervention group to limit interference between intervention groups. We will randomly select  
45  
46 270 on which partner the randomization for the intervention group is based. Any resulting  
47  
48 271 unbalance in the number of subjects per treatment arm will be corrected in the randomization  
49  
50 272 of the next block. Due to the nature of the study, researchers, nutritionists and participants are  
51  
52 273 not blinded to the study group.  
53  
54  
55  
56  
57  
58  
59  
60

1  
2  
3 275 *Study timeline*  
4

5 276 The first clinic visit starts with written informed consent, and when participants are eligible,  
6  
7 277 the baseline assessment will be performed. The baseline assessment consists of  
8  
9  
10 278 questionnaires (frailty status, risk of sarcopenia, self-reported mobility limitations, quality of  
11  
12 279 life (QoL) and health care costs) and measurements (physical function, muscle strength and  
13  
14 280 body composition). See below ‘primary and secondary outcomes’ and ‘other measures’ for  
15  
16 281 details on these assessments. An accelerometer will be attached to measure physical activity  
17  
18 282 for 7 subsequent days.  
19  
20

21 283 After the baseline assessment, participants will be randomised to one of the three  
22  
23 284 study groups done by the nutritionists and they will inform the participants in which group  
24  
25 285 they are allocated to. Participants randomized to one of the two intervention groups will be  
26  
27 286 invited for a consultation meeting at the clinic to receive their personalized dietary advice,  
28  
29 287 and personalized advice on optimizing the timing of protein intake in close proximity of usual  
30  
31 288 physical activity (intervention group 2 only). This will take place within 2 weeks after the  
32  
33 289 baseline assessment since the personalized advice needs to be composed by the nutritionist.  
34  
35 290 The baseline assessment is considered the start of the study period for participants of the  
36  
37 291 control group, while the consultation meeting is considered the start of the study period for  
38  
39 292 participants of the intervention groups.  
40  
41  
42  
43

44 293 One week prior to the 3-month follow-up visit, dietary intake will be assessed again  
45  
46 294 by means of a combination of three food diaries and three 24-h dietary recalls. The 3-month  
47  
48 295 follow-up visit will take place at the clinic and includes measurement of BW, assessment of  
49  
50 296 self-reported mobility limitations, risk of sarcopenia, QoL, health care costs and the  
51  
52 297 accelerometer will be attached to measure physical activity for 7 subsequent days.  
53  
54

55 298 One week prior to the 6-month follow-up visit (final measurement) dietary intake will  
56  
57 299 again be assessed by means of a combination of three food diaries and three 24-h dietary  
58  
59  
60

1  
2  
3 300 recalls, which allows us to determine compliance to the dietary advice. The 6-month follow-  
4  
5 301 up visit at the clinic includes all measurements performed during the baseline visit and the  
6  
7 302 accelerometer is attached again to measure physical activity for the next 7 days. Finally,  
8  
9  
10 303 among participants of the intervention groups only, several questions regarding the  
11  
12 304 appreciation and adherence of the intervention and participants' intention to follow the  
13  
14 305 dietary advice in the future will be asked in order to perform a process-evaluation. Figure 1  
15  
16  
17 306 shows the study timeline and Table 2 provides an overview of all measurements.  
18  
19  
20 307

### 21 308 *Intervention*

22  
23 309 Participants in the intervention group 1 will receive a personalized dietary advice face-to-face  
24  
25 310 by nutritionists dedicated to this study aiming at increasing their protein intake to at least 1.2  
26  
27 311 g/kg aBW/d (without increasing total daily energy intake), based on their habitual dietary  
28  
29 312 characteristics (based on three 24-h recalls), protein intake and measured BW assessed at  
30  
31 313 baseline. Participants will be asked if they usually prepare the main meal; whether they eat  
32  
33 314 the meal at a e.g. community home; whether they consume ready-to-eat meals; whether they  
34  
35 315 use meal services; and if they eat at family or friends' home. All their answers will be  
36  
37 316 incorporated in the personalized dietary advice. Participants will receive written dietary  
38  
39 317 advice accompanied by a verbal explanation from the nutritionist. Participants can contact the  
40  
41 318 nutritionist at any time by mail or phone in case any question arise. The advice includes the  
42  
43 319 use of regular protein rich food products and protein enriched food products provided by the  
44  
45 320 research team, and will be based on personal dietary preferences. Protein enriched food  
46  
47 321 products that can be incorporated within the regular diet include protein bars, cereals,  
48  
49 322 puddings, coconut water and whey powder, which will be freely provided and shipped to  
50  
51 323 participants' home. Those products can be incorporated in the dietary advice as they can  
52  
53 324 make it easier to increase protein intake due to their high protein content.  
54  
55  
56  
57  
58  
59  
60

325 **Table 2.** Measurements and time of measurements in the PROMISS trial

|                                 |                                                                  | <b>Timeline</b>  |                  |                 |                 |                 |
|---------------------------------|------------------------------------------------------------------|------------------|------------------|-----------------|-----------------|-----------------|
|                                 |                                                                  | <b>Screening</b> | <b>Screening</b> | <b>Baseline</b> | <b>3-</b>       | <b>6-</b>       |
|                                 |                                                                  | <b>(phone)</b>   | <b>visit</b>     | <b>visit</b>    | <b>month</b>    | <b>month</b>    |
|                                 |                                                                  |                  | <b>(prior</b>    |                 | <b>FU visit</b> | <b>FU visit</b> |
|                                 |                                                                  |                  | <b>baseline)</b> |                 |                 |                 |
| <b>Topic</b>                    | <b>Specific variables</b>                                        |                  |                  |                 |                 |                 |
| Oral informed consent (phone)   |                                                                  | ✓                |                  |                 |                 |                 |
| Screening questionnaire (phone) | Sex, age, self-reported weight, height, eligibility criteria     | ✓                |                  |                 |                 |                 |
| Protein intake                  | Pro55+ screening (38) (phone)                                    | ✓                |                  |                 |                 |                 |
| Protein intake                  | Combination of three food diaries and three 24-h dietary recalls |                  | ✓                |                 | ✓               | ✓               |
| Written informed consent        |                                                                  |                  | ✓                |                 |                 |                 |
| Cognitive function              | MMSE (29)                                                        |                  | ✓                |                 |                 |                 |

1  
2  
3  
4  
5  
6  
7  
8  
9  
10  
11  
12  
13  
14  
15  
16  
17  
18  
19  
20  
21  
22  
23  
24  
25  
26  
27  
28  
29  
30  
31  
32  
33  
34  
35  
36  
37  
38  
39  
40  
41  
42  
43  
44  
45  
46

|                                    |                                                     |   |   |   |
|------------------------------------|-----------------------------------------------------|---|---|---|
| Physical functioning               | 400-m walk test (41, 42)                            | ✓ |   | ✓ |
| Antropometrics                     | Measured body height                                | ✓ |   |   |
| Antropometrics                     | Measured body weight                                | ✓ | ✓ | ✓ |
| Demographic                        | Education, household                                |   | ✓ |   |
| General characteristics            | Perceived health, smoking status                    |   | ✓ | ✓ |
| Body composition                   | Bio-electrical impedance                            |   | ✓ | ✓ |
| Body composition                   | Air displacement plethysmography (Dutch site only)  |   | ✓ | ✓ |
| Physical functioning               | SPPB (43)                                           |   | ✓ | ✓ |
| Muscle strength                    | Handgrip strength                                   |   | ✓ | ✓ |
| Muscle strength                    | Leg extension strength                              |   | ✓ | ✓ |
| Self-reported mobility limitations | Ability to walk 400m and climb one flight of stairs |   | ✓ | ✓ |
| Risk of sarcopenia                 | SARC-F questionnaire (44)                           |   | ✓ | ✓ |

|    |                                    |                                                           |   |   |   |
|----|------------------------------------|-----------------------------------------------------------|---|---|---|
| 1  |                                    |                                                           |   |   |   |
| 2  |                                    |                                                           |   |   |   |
| 3  | Malnutrition                       | BMI < 22.0 kg/m <sup>2</sup> or unintentional weight loss | ✓ |   | ✓ |
| 4  |                                    |                                                           |   |   |   |
| 5  |                                    | > 5% in the last 6 months                                 |   |   |   |
| 6  |                                    |                                                           |   |   |   |
| 7  |                                    |                                                           |   |   |   |
| 8  | Frailty                            | Frailty Fried Frailty Index (45)                          | ✓ |   | ✓ |
| 9  |                                    |                                                           |   |   |   |
| 10 | Quality of Life                    | EuroQol 5D (46)                                           | ✓ | ✓ | ✓ |
| 11 |                                    |                                                           |   |   |   |
| 12 |                                    |                                                           |   |   |   |
| 13 | Health care costs                  | RUD (47)                                                  | ✓ | ✓ | ✓ |
| 14 |                                    |                                                           |   |   |   |
| 15 |                                    |                                                           |   |   |   |
| 16 | Appetite                           | SNAQ-Appetite (48)                                        | ✓ |   | ✓ |
| 17 |                                    |                                                           |   |   |   |
| 18 | Physical activity                  | Accelerometers                                            | ✓ | ✓ | ✓ |
| 19 |                                    |                                                           |   |   |   |
| 20 |                                    |                                                           |   |   |   |
| 21 | Process evaluation                 |                                                           |   |   | ✓ |
| 22 |                                    |                                                           |   |   |   |
| 23 |                                    |                                                           |   |   |   |
| 24 |                                    |                                                           |   |   |   |
| 25 |                                    |                                                           |   |   |   |
| 26 | <i>Persuasive technology study</i> |                                                           |   |   |   |
| 27 |                                    |                                                           |   |   |   |
| 28 | Communication style preferences    | Personality traits form                                   | ✓ |   |   |
| 29 |                                    |                                                           |   |   |   |
| 30 |                                    |                                                           |   |   |   |
| 31 | Usage data of technology           | Practical experiences, interaction data of                |   | ✓ | ✓ |
| 32 |                                    |                                                           |   |   |   |
| 33 |                                    | technology (number of notifications, openings,            |   |   |   |
| 34 |                                    |                                                           |   |   |   |
| 35 |                                    | registered food intake, games)                            |   |   |   |
| 36 |                                    |                                                           |   |   |   |
| 37 |                                    |                                                           |   |   |   |
| 38 | Attitude towards technology        | Questionnaire                                             |   |   | ✓ |
| 39 |                                    |                                                           |   |   |   |
| 40 |                                    |                                                           |   |   |   |
| 41 |                                    |                                                           |   |   |   |
| 42 |                                    |                                                           |   |   |   |
| 43 |                                    |                                                           |   |   |   |
| 44 |                                    |                                                           |   |   |   |
| 45 |                                    |                                                           |   |   |   |
| 46 |                                    |                                                           |   |   |   |

1  
2  
3  
4  
5  
6  
7  
8  
9  
10  
11  
12  
13  
14  
15  
16  
17  
18  
19  
20  
21  
22  
23  
24  
25  
26  
27  
28  
29  
30  
31  
32  
33  
34  
35  
36  
37  
38  
39  
40  
41  
42  
43  
44  
45  
46

*Microbiota study*

|                 |                                                  |   |   |
|-----------------|--------------------------------------------------|---|---|
| Oral health     | Questionnaire                                    | ✓ | ✓ |
| Oral microbiota | Tongue swab (16S rRNA sequencing)                | ✓ | ✓ |
| Gut microbiota  | Fresh frozen faecal sample (16S rRNA sequencing) | ✓ | ✓ |

*fMRI study*

|                                   |                                                                                        |   |   |
|-----------------------------------|----------------------------------------------------------------------------------------|---|---|
| Oral microbiota                   | Fasted unstimulated salivary sample (16S rRNA sequencing)                              | ✓ | ✓ |
| Nutritional and microbial markers | Blood sample                                                                           | ✓ | ✓ |
| Appetite                          | VAS-scores of appetite and central neural responses to food-cues measured by fMRI-scan | ✓ | ✓ |



1  
2  
3 327 Participants receive guidelines how to incorporate the protein enriched food products within  
4  
5 328 their diet. The dietary advice will also incorporate the advice to consume at least one daily  
6  
7 329 meal consisting of  $\geq 35$  g protein, as studies have shown that this amount increases MPS in  
8  
9 330 older adults (49-51).

10  
11  
12 331 Participants in intervention group 2 will receive the same dietary advice as  
13  
14 332 intervention group 1, and the personalized advice to consume at least 7.5-10 g protein  
15  
16 333 through protein (en)rich(ed) food products within half an hour after performing usual  
17  
18 334 physical activity as this may enhance resistance exercise induced MPS (27). One RCT among  
19  
20 335 older adults has shown that protein supplementation in combination with resistance exercise  
21  
22 336 had beneficial effects on e.g. muscle mass and function, but no differences in effect were  
23  
24 337 found between protein consumption pre versus post resistance exercise (52). We therefore  
25  
26 338 recommend protein intake after physical activity as this is a uniform and more feasible advice  
27  
28 339 compared to ‘in close proximity of’, and might also result in less stomach discomfort as  
29  
30 340 compared to protein consumption prior to physical activity. Usual physical activity is defined  
31  
32 341 as either physical exercise (e.g. biking, swimming, tennis) or the most intensive activities of  
33  
34 342 daily living when the participant does not engage in physical exercise (e.g. gardening,  
35  
36 343 housekeeping, doing groceries) for a minimum of 30 minutes. The advice is linked to most  
37  
38 344 extensive or longest physical activity. Participants are instructed not to become more or less  
39  
40 345 physically active but merely to shift their physical activity or protein intake moment.

41  
42  
43 346 During the intervention period, nutritionists will plan follow-up phone calls in  
44  
45 347 consultation with the participants during week 2, week 4, week 8, week 16 and week 20 to  
46  
47 348 ask if they have understood the advice and are able to adhere to the advice. In addition, any  
48  
49 349 issues related to the use of protein enriched food product can be discussed (intervention  
50  
51 350 groups only). If necessary, changes in the dietary advice will be made, for example when  
52  
53 351 weight change  $> 2$  kg has occurred (based on self-assessment). Participants allocated to the  
54  
55  
56  
57  
58  
59  
60

1  
2  
3 352 control group do not receive any intervention, but are contacted on similar time points as the  
4  
5 353 intervention groups to ask how they are doing.

7 354 All participants are invited to a minimum of one organized lecture on non-health related  
8  
9  
10 355 themes and other social events during the trial in order to stimulate their commitment to the  
11  
12 356 trial. Separate lectures/events (with the same topic) are organized for the intervention groups  
13  
14 357 and the control group to prevent interference between intervention arms. Participants can  
15  
16 358 freely attend those lectures and all travel costs will be reimbursed.

17  
18  
19 359

### 21 360 Compliance

23  
24 361 We will collect dietary intake prior to the 3-month follow-up visit (by means of the  
25  
26 362 combination of three food diaries and three 24-h dietary recalls) to assess compliance to the  
27  
28 363 dietary advice. This information allows the nutritionists to provide additional advice – if  
29  
30 364 needed – for participants in the intervention groups, which will be provided during the 3-  
31  
32 365 month follow-up visit. Dietary intake will again be assessed at follow-up and compliance to  
33  
34 366 the dietary advice will be determined.

35  
36  
37 367

### 39 368 Intervention fidelity

41  
42 369 To ensure good adherence to the intervention protocols at both study sites, all personnel  
43  
44 370 working for the trial have undergone extensive training. The nutritionists will follow written  
45  
46 371 standardized operational procedures to develop and provide the personalized dietary advice  
47  
48 372 (with or without additional advice to consume protein within half an hour after usual physical  
49  
50 373 activity). Four times during the conduct of the trial, the nutritionists from one site will visit  
51  
52 374 the other site to attend assessments, and potentially notice and correct differences in order to  
53  
54 375 ensure identical execution of the trial at both sites. In addition, monthly Skype-meetings will  
55  
56 376 be held between all staff involved in the execution of the trial at both sites to solve any  
57  
58  
59  
60

1  
2  
3 377 potential day-to-day issues in a standardized way. Furthermore, identical participant  
4  
5 378 brochures and other printed materials have been developed and translated to Dutch and  
6  
7  
8 379 Finnish language.  
9

10 380

11  
12 381 *Outcomes*

13  
14 382 Primary outcome

15  
16  
17 383 The primary outcome of the PROMISS trial is 6-months change in physical functioning  
18  
19 384 measured by change in walk time using a 400-m walk test (Long Distance Corridor Walk)  
20  
21 385 (41, 42). This test is predictive for higher risk of mortality, incident cardiovascular disease  
22  
23 386 and mobility limitation and disability (53). One advantage of this continuous outcome is that  
24  
25 387 it enables discrimination between categories of risk among participants (54), and it is less  
26  
27 388 prone to a ceiling effect as compared to other functional outcome measures (e.g. SPPB) (55).  
28  
29 389 The course for the 400-m test is 20-m long and marked by a traffic cone and tape line at the  
30  
31 390 beginning and end. For all participants, the test will begin with a mandatory 40-m walk  
32  
33 391 (warm-up) at their usual pace. Thereafter the 400-m test starts with the feet behind and just  
34  
35 392 touching the starting line and ends after 10 complete rounds when one foot is behind the end  
36  
37 393 line. For the 400-m test, older adults will be instructed to walk as fast as possible at a pace  
38  
39 394 they can maintain for 400 m. Standardized encouragement will be given each lap, including  
40  
41 395 the number of laps remaining. At the 6-month follow-up visit, older adults are allowed to use  
42  
43 396 a cane, can take rest as needed (but no rest longer than 60 seconds) and there will be a time  
44  
45 397 limit of 17 minutes. Time will be recorded to the nearest second.  
46  
47  
48  
49  
50

51 398

52  
53 399 Secondary outcomes

54  
55  
56 400 The secondary outcomes are changes in physical performance, muscle strength, body  
57  
58 401 composition, self-reported mobility limitations, QoL, incidence of frailty, incidence of  
59  
60

1  
2  
3 402 sarcopenia risk, and incidence of malnutrition. We will also investigate change in health care  
4  
5 403 costs.

6  
7  
8 404 Physical performance will be assessed by means of the Short Physical Performance  
9  
10 405 Battery (SPPB) (43). The SPPB assesses lower extremity function which consists of three  
11  
12 406 timed tests: repeated (5x) chair stands test, 4-meter walk test and three standing balance tests  
13  
14 407 (ability to stand with the feet together in the side-by-side, semi-tandem, and tandem  
15  
16 408 positions). The total score ranges from 0-12. A higher score indicates better physical  
17  
18 409 functioning.

19  
20  
21 410 Muscle strength will be determined by hand-grip strength (kg). Hand-grip strength is  
22  
23 411 an indicator of overall muscle strength (56) and a higher hand grip strength is associated with  
24  
25 412 decreased risk of physical disabilities (57) and all-cause mortality in old age (57, 58).

26  
27 413 Maximum grip strength will be measured three times at each hand during baseline and 6-  
28  
29 414 month follow-up visit. We will use a digital dynamometer (Saehan Digital Hand held  
30  
31 415 dynamometer) adjusted for hand size. Participants will be measured in an upright sitting  
32  
33 416 position with the forearms supported by the armrest of a chair according to a standardized  
34  
35 417 protocol (59). The mean of the maximum score of left and right hand will be used for  
36  
37 418 analyses. Muscle strength will also be determined by leg extension strength (N). A higher leg  
38  
39 419 extension strength is associated with decreased risk of mobility disability (60, 61) and lower  
40  
41 420 risk of early mortality (62-64). Leg extension strength will be assessed using a chair designed  
42  
43 421 to measure leg extension strength (65). Maximum leg extension strength will be measured  
44  
45 422 three times for each leg during baseline and 6-month follow-up visit. The mean of the  
46  
47 423 maximum score of left and right leg will be used for analyses.

48  
49 424 Body composition will be estimated by means of bioelectrical impedance using the  
50  
51 425 BodyStat 1500MDD device, using the Kyle equation to determine fat percentage (%), fat  
52  
53 426 mass and fat-free mass (66) and the Sergi equation to determine appendicular skeletal muscle  
54  
55  
56  
57  
58  
59  
60

1  
2  
3 427 mass (ASMM, kg) (67). Additionally, at the Dutch study site, body composition (fat free  
4  
5 428 mass (kg), fat mass and fat percentage (%)) will be measured by air displacement  
6  
7  
8 429 plethysmography (68).

9  
10 430 Self-reported mobility limitations will be assessed by means of a questionnaire;  
11  
12 431 “Because of your health, how much difficulty do you have walking 400 meter?” and  
13  
14 432 “Because of your health, how much difficulty do you have climbing 10 steps?” Participants  
15  
16 433 will respond using a five level Likert scale: ‘no difficulty’, ‘a little difficulty’, ‘some  
17  
18 434 difficulty’, ‘a lot of difficulty’ and ‘unable to do the activity’. Mobility limitation is defined  
19  
20 435 as two consecutive reports of having any difficulty walking 400 meter or climbing 10 steps  
21  
22 436 without resting due to a health or a physical problem.

23  
24  
25  
26 437 QoL will be measured using the EuroQol 5D – 5L questionnaire (46).

27  
28 438 Incident frailty will be assessed using the Fried criteria (45). Participants will be  
29  
30 439 considered ‘frail’ when three or more components are present. Those with no components  
31  
32 440 will be considered ‘robust’, whereas those with one or two components will be considered  
33  
34 441 ‘prefrail’. The criteria include 1) self-reported unintentional weight loss (> 4 kg in past 6  
35  
36 442 months), 2) self-reported exhaustion (based on two questions from the Center for  
37  
38 443 Epidemiologic Studies Depression (CES-D) scale on exhaustion in the past week at baseline  
39  
40 444 and follow-up: “I felt that everything I did was an effort” and “I could not get going”. Scores  
41  
42 445 ranges from 1 ‘rarely or none of the time’ to 4 ‘always or most of the time’. A score of 3 or 4  
43  
44 446 on either question indicates exhaustion (69), 3) weakness (grip strength in the lowest 20% of  
45  
46 447 the whole study population based on the mean of the maximum scores, adjusted for gender  
47  
48 448 and BMI), 4) slow walking speed (walk time on the 4m walk test in the slowest 20% of the  
49  
50 449 whole study population, adjusted for gender and height), and 5) low physical activity (total  
51  
52 450 counts per week based on the accelerometer data in the lowest 20% of physical activity for  
53  
54 451 each gender). Incident frailty is considered deterioration of frailty status; i.e. from robust at  
55  
56  
57  
58  
59  
60

1  
2  
3 452 baseline to pre-frail or frail at follow-up or from pre-frail at baseline to frail at follow. Frail  
4  
5 453 participants at baseline will be excluded from these analyses.

6  
7 454 Incidence of sarcopenia risk will be assessed with the SARC-F questionnaire (44);  
8  
9 455 how much effort do you experience when 1) lifting and carrying a bag of 4.5 kilo, 2) walking  
10  
11 456 across a room, 3) transferring from a chair or bed, 4) climbing a flight of 10 stairs, and 5)  
12  
13 457 how many times have you fallen in the past year. Answering option include no effort (0  
14  
15 458 points), a bit of effort (1 point) and a lot of effort (2 points), where a score equal to or greater  
16  
17 459 than 4 is predictive of sarcopenia and poor outcomes. Participants with risk of sarcopenia at  
18  
19 460 baseline will be excluded from these analyses.

20  
21 461 Incidence of malnutrition will be defined as BMI < 22.0 kg/m<sup>2</sup> or unintentional  
22  
23 462 weight loss > 5% in the last 6 months. Malnourished participants at baseline will be excluded  
24  
25 463 from these analyses.

26  
27 464 A modified version of the Resource Utilization in Dementia Questionnaire (RUD)  
28  
29 465 (47) will be used to collect data on health care and social utilization costs over the period  
30  
31 466 three month prior to baseline, three months prior to the 3-month follow-up visit and three  
32  
33 467 months prior to 6-month follow-up visit. Costs include costs of primary and secondary care,  
34  
35 468 complementary care, informal care and home care.

36  
37 469

38  
39 470 Other measures

40  
41 471 BW will be measured without shoes in underwear to the nearest 0.1 kg using a digital  
42  
43 472 calibrated scale (Finland; SECA 877, the Netherlands; Marsden M-520). Body height will be  
44  
45 473 measured to the nearest millimeter using a SECA stadiometer for mobile height  
46  
47 474 measurements (Finland; SECA 217, the Netherlands; SECA 214). Corrections will be made  
48  
49 475 to adjust the measured body weight for clothing, shoes or a cast (minus 1 kg for each  
50  
51 476 element), and to adjust the measured body height for shoes (minus 1 cm). Change in BW and  
52  
53  
54  
55  
56  
57  
58  
59  
60

1  
2  
3 477 BMI at 3-month and 6-month will be calculated. As the personalized dietary advice is  
4  
5 478 isocaloric, no significant difference in BW or BMI are expected. Physical activity will be  
6  
7 479 objectively assessed by means of an accelerometer (Axivity, AX3) during 7 subsequent days  
8  
9 480 after each clinic visit (baseline, 3-month follow-up visit and 6-month follow-up visit). The  
10  
11 481 accelerometer will be attached by a nutritionist to the frontal part of the right thigh in the  
12  
13 482 mid-point between iliac crest and patella bone when sitting down, with a surgical plaster.  
14  
15 483 Participants can perform any physical activity as the accelerometer is water resistant.  
16  
17 484 Appetite will be measured with SNAQ-Appetite questionnaire (48). Dietary intake will be  
18  
19 485 assessed by means of a combination of three food diaries and three 24-h dietary recalls prior  
20  
21 486 the 3-month follow-up visit and the 6-month follow-up visit.  
22  
23  
24  
25  
26  
27

## 28 488 *Sample size and statistical analyses*

### 30 489 Sample size

32  
33 490 The study is powered to detect a substantial meaningful change of 28 sec (SD=61 sec) (70)  
34  
35 491 between the respective intervention groups and the control group on the primary outcome  
36  
37 492 walk time on the 400-m walk test, assuming a 2-sided test at  $\alpha=0.05$  with a power of 0.8. For  
38  
39 493 this, 75 participants per group are needed, which is 225 in total. Assuming a drop-out of 15%  
40  
41 494 (which was reported in a comparable study of Bhasin et al. 2018 (19), the total number of  
42  
43 495 study participants to be included in the study is  $n=264$ . Therefore, we aim to include a total of  
44  
45 496  $n=132$  at each study site ( $n=44$  per study group per study site).  
46  
47  
48

49 497

### 51 498 Statistical analyses plan

53  
54 499 Statistical reporting will be according to the CONSORT standards (71). The collected data at  
55  
56 500 the two study sites will be pooled together at the Amsterdam site, with a variable indicating  
57  
58 501 study site. All statistical analyses on primary and secondary outcome measures will be  
59  
60



1  
2  
3 502 performed by an independent statistician blinded for group allocation. Baseline  
4  
5 503 characteristics will be described (percentages, means  $\pm$  standard deviations) by study group.

6  
7 504 The primary analyses will be based on the intention-to-treat principle, i.e. data from  
8  
9  
10 505 participants allocated to the intervention groups will be analyzed as part of those groups,  
11  
12 506 irrespectively of their level of adherence to the advice. Multiple Imputation using  
13  
14 507 multivariate Imputation by Chained Equations will be used to impute missing cost and effect  
15  
16 508 data. The continuous primary outcome (change in 400-m walk time) will be analyzed using  
17  
18 509 mixed model regression analyses with study site as random variable. We will adjust for  
19  
20 510 baseline 400-m walk time as well as baseline protein intake (g/kg aBW/d) and sex (the  
21  
22 511 stratification factors for randomization). We will compare intervention effects of the  
23  
24 512 respective intervention groups versus the control group. Effects will also be expressed in  
25  
26 513 Cohen's d and the corresponding 95% confidence intervals will be calculated, which allows  
27  
28 514 comparison between intervention effect estimates between different outcome measures. The  
29  
30 515 secondary outcomes and other measures will be analyzed using mixed model regression  
31  
32 516 analogously to the primary outcome. For binary secondary outcomes, generalized estimating  
33  
34 517 equation models will be used. With regard to time-to-event analyses (incident sarcopenia risk  
35  
36 518 and mobility limitations) Cox proportional hazard models will be used. Time-to-event is  
37  
38 519 defined as the time of the start of the study period to the date of the first occurrence of the  
39  
40 520 event (3-month follow-up visit or 6-month follow-up visit). Participants who do not meet  
41  
42 521 these criteria will be censored at the latest time we had information available. We will  
43  
44 522 perform subgroup analyses stratified by baseline protein intake (< 0.9 or 0.9-1.0 g/kg  
45  
46 523 aBW/d), sex and baseline 400-m time (based on median) for the primary and secondary  
47  
48 524 outcomes.

49 525 Per-protocol analyses will also be conducted as a sensitivity analysis. Effect estimates  
50  
51 526 for change in primary and secondary outcome measures will be calculated for participants  
52  
53  
54  
55  
56  
57  
58  
59  
60



1  
2  
3 527 from the intervention groups who reached the protein target of at least 1.2 g/kg aBW/d after  
4  
5 528 both 3 and after 6 months (mean protein intake based on the three 24-h dietary recalls) vs.  
6  
7  
8 529 participants from the control group. Data will be analyzed using SPSS (IBM SPSS Statistics.  
9  
10 530 Armonk, NY). A two-sided *P*-value of 0.05 is considered statistical significant.

11  
12 531 The cost-effectiveness analysis will be performed from a healthcare perspective. Total  
13  
14 532 mean costs during the study will be related to physical functioning (the 400-m walk test) and  
15  
16 533 change in Quality-Adjusted Life-Years based on the EuroQol 5D questionnaire. Mixed model  
17  
18 534 regression analyses will be used to estimate differences in the primary outcome of the  
19  
20 535 respective interventions groups versus the control group. Linear regression analyses will be  
21  
22 536 used to estimate differences in QoL (expressed as Quality-Adjusted Life-Years) and  
23  
24 537 healthcare costs. Incremental cost-effectiveness ratios will be calculated by dividing the  
25  
26 538 difference in costs by the difference in effects. Statistical uncertainty will be estimated using  
27  
28 539 bias-corrected accelerated bootstrapping (5000 replications) and will be presented using cost-  
29  
30 540 effectiveness planes and cost-effectiveness acceptability curves.

31  
32  
33  
34  
35 541  
36  
37 542 *Participants' safety*

38  
39 543 In case any (medical) questions arise during the screening or intervention period, participants  
40  
41 544 can consult an independent medical doctor. All adverse events and serious adverse events  
42  
43 545 will be tracked by the nutritionists during the follow-up phone calls, 3-month follow-up visit  
44  
45 546 and 6-month follow-up visit to assess their potential relationship to the intervention at both  
46  
47 547 sites and will be documented in the final report. Adverse events will be reported within 7 days  
48  
49 548 (death or life threatening situations) or within 15 days (in case of other adverse events) of  
50  
51 549 first knowledge to The Medical Ethical Committee of the Amsterdam UMC, location Vumc  
52  
53 550 (required for the Dutch site only).

54  
55  
56  
57  
58 551  
59  
60

1  
2  
3 552 *Data quality assurance and data management*  
4

5 553 Research data will be collected at each site and each visit (baseline, 3-month follow-up visit  
6  
7 554 and 6-month follow-up visit) using a standardized protocol with the same order of  
8  
9  
10 555 assessments, and entered twice in separate electronic datasets. When discrepancies between  
11  
12 556 the datasets are found, the original questionnaire will be consulted. Questionnaire items and  
13  
14 557 measurements will include the corresponding variable names to minimize errors in data  
15  
16  
17 558 entering. Finally the two final electronic dataset (one from each site) containing all data will  
18  
19 559 be pooled. A data catalogue and codebook will be developed.  
20

21 560 Original questionnaires will be stored in a secure manner at each site in an area with  
22  
23 561 limited access. All records that contain names (i.e. informed consent forms), will be stored  
24  
25 562 separately from study records identified by code number. All databases will be secured with  
26  
27  
28 563 password-protected access systems.  
29

30  
31 564

32  
33 565 *Patient and Public Involvement*  
34

35 566 The PROMISS randomized controlled trial is designed by the Faculty of Science (VU  
36  
37 567 Amsterdam, the Netherlands) and the Department of General Practice and Primary Health  
38  
39 568 Care (University of Helsinki, Finland) (please see Appendix I for the PROMIS trial group), a  
40  
41  
42 569 collaboration of the EU Horizon 2020 PROMISS Project. Two medical and one ethical  
43  
44 570 advisor are involved in the study. As part of the PROMISS project, we previously performed  
45  
46  
47 571 three pilot studies as a preparation of the long term PROMISS randomized trial, of which one  
48  
49 572 is published (72). We included the feedback of the participants in designing the long term  
50  
51 573 PROMISS randomized trial; participants enjoyed participating in the pilot studies and they  
52  
53 574 liked the frequent contact with the nutritionist. We also tested which protein enriched food  
54  
55  
56 575 products they preferred and included those products in the long term PROMISS randomized  
57  
58 576 trial which they liked the most. Older adults are not involved in recruitment of participants or  
59  
60

1  
2  
3 577 conduct of the study. Results of this study will be disseminated to participants through  
4  
5 578 sending them a lay abstract with the results and conclusions of the study. At the end of the  
6  
7  
8 579 study, each participant will receive a fact-sheet with personal results of dietary intake data,  
9  
10 580 hand grip strenght, body composition mesures and body weight. Participant burden of the  
11  
12 581 pilot intervention was assessed using informal feedback from older adults participating in one  
13  
14  
15 582 of three pilot studies.  
16

17 583

18  
19 584 *Ancillary studies*

20  
21 585 Within the PROMISS trial, three ancillary studies will be conducted: 1) persuasive  
22  
23 586 technology study, 2) microbiota study, and 3) fMRI study.  
24  
25

26 587

27  
28 588 1. Persuasive technology study

29  
30 589 The primary aim of this study is to examine the effect of persuasive technology on adherence  
31  
32  
33 590 to the personalized dietary advice aiming at increasing protein intake to at least 1.2 g/kg  
34  
35 591 aBW/d in a sub-sample of Dutch participants from intervention group 1 (n=24) and  
36  
37 592 intervention group 2 (n=24), i.e. the first 24 participants of intervention group 1 and the first  
38  
39 593 24 participants of intervention group 2 that consent to it (writting informed consent will be  
40  
41 594 signed).  
42  
43

44 595 Participants will be provided with a food storage box that registers which provided  
45  
46 596 protein enriched food products are taken out. The food box is used to store the protein  
47  
48 597 enriched food products provided by the research team. Participants will also receive a tablet  
49  
50 598 that allows participants to register any consumed protein enriched food products and supports  
51  
52 599 them in finding alternative food products that contain a comparable amount of protein. For  
53  
54 600 this, the system uses the personalized dietary advice as provided by the nutritionist and data  
55  
56 601 from the storage box. The tablet application aims to stimulate adherence to the dietary advice  
57  
58  
59  
60

1  
2  
3 602 by providing tailored and personalized messages. In addition, personality characteristics and  
4  
5 603 communication style preferences that are determined via a questionnaire completed at  
6  
7 604 baseline are used to tailor the style and tone of these messages (73).

8  
9  
10 605 In addition to the personalized messages, half of the participants from intervention  
11  
12 606 group 1 and 2 who participate in the persuasive technology sub-study will also receive a  
13  
14 607 gamified version of the tablet application ( $n=12 + n=12$ ). In this version, participants can earn  
15  
16 608 game-points by registering their consumed protein (en)rich(ed) food products and by playing  
17  
18 609 mini-games about the protein content of foods (i.e. guess the protein content, more-or-less  
19  
20 610 protein). The distribution of receiving the gamified version vs. standard version is quasi-  
21  
22 611 randomized, where we will balance the group size.

23  
24  
25 612 At the consultation meeting, participants receive their food storage box and tablet.  
26  
27 613 Both are fully configured, i.e. they are loaded with their personal dietary advice. After the 6-  
28  
29 614 month follow-up visit, participants will be asked to return the equipment and fill out  
30  
31 615 questions on the feasibility and user experience of the provided persuasive technology.

32  
33 616 The secondary objectives are 1) to investigate to what extent participants perceive  
34  
35 617 messages of which the style and tone are adapted to their personal characteristics as  
36  
37 618 personalized and adequate, and 2) to determine the effect of gamification on the effectiveness  
38  
39 619 and feasibility of the persuasive technology.

40  
41  
42 620

## 43 621 2. Microbiota study

44  
45 622 In the microbiota study, the effect of personalized dietary advice aiming at increasing protein  
46  
47 623 intake in community-dwelling older adults with lower habitual protein intake on both the oral  
48  
49 624 and gut microbiota is investigated. The study will be conducted at both study sites.

50  
51 625 The human microbiota consists of the  $4 \times 10^{13}$  micro-organisms that inhabit the body  
52  
53 626 (74). The emergence of next generation DNA sequencing techniques at the start of the 21<sup>st</sup>  
54  
55  
56  
57  
58  
59  
60

1  
2  
3 627 century has allowed more detailed study of the microbiota and since then, the microbiota  
4  
5 628 composition has been associated with both health and disease (75), as well as aging itself (76,  
6  
7 629 77). Moreover, several interventional studies proved that dietary changes also affect the gut  
8  
9 630 microbiota, with the first microbial shifts being evident within 48 hours (78). The altered  
10  
11 631 microbiota in turn, can differentially affect the human host metabolism through the  
12  
13 632 production of metabolically active metabolites. Less is known about the oral microbiota. It  
14  
15 633 was found to be associated with oral health and function and even nutritional status (79, 80),  
16  
17 634 but its possible role in undernutrition in older adults has not been investigated.

18  
19 635 A fresh frozen fecal sample and tongue swab is collected at baseline and 6-month  
20  
21 636 follow-up visit once written informed consent is provided. Participants from either the control  
22  
23 637 group or intervention group 1 can be included in this study. Participants from the intervention  
24  
25 638 group 2 are excluded to limit the number of groups and parameters in this exploratory study.  
26  
27 639 Additional exclusion criteria are: use of systemic antibiotics in the three months prior to the  
28  
29 640 first sampling visit, diagnosis with inflammatory bowel disease and prolonged  
30  
31 641 institutionalization (> 4 weeks) in the three months prior to the first sampling visit. There is  
32  
33 642 no restriction other than consent rate to the number of PROMISS participants that will be  
34  
35 643 included in this side study.

36  
37 644 Once all samples from all participants are collected, fecal samples are shipped to the  
38  
39 645 Wallenberg Laboratory of Cardiovascular and Metabolic research (at the University of  
40  
41 646 Gothenburg, in Sweden) for 16S rRNA sequencing using sequencing methods previously  
42  
43 647 described (81). The tongue swabs will be send to the Netherlands Organisation for Applied  
44  
45 648 Scientific Research for 16S rRNA sequencing as is previously described (82).

46  
47 649

48  
49 650 3. fMRI study

1  
2  
3 651 In the fMRI study, we will investigate the effect of personalized dietary advice aiming at  
4  
5 652 increasing protein intake in community-dwelling older adults with lower habitual protein  
6  
7 653 intake on central brain circuits involved in the regulation of appetite. Several studies  
8  
9  
10 654 demonstrated that increasing protein intake affects appetite (83) and the gut microbiota (84).  
11  
12 655 However, none have studied the effects on both simultaneously, or the interaction. A  
13  
14 656 functional MRI (fMRI) scan will be used to measure the brain responses to visual or actual  
15  
16  
17 657 food cues. Brain activity in response to food cues will also be related to (shifts) in the gut  
18  
19 658 microbiota. Therefore, only participants from the microbiota side study can be included in  
20  
21 659 this study, with additional exclusion criteria: being claustrophobic, being diagnosed with a  
22  
23 660 mental disorder (e.g. depression or addiction), being uncorrectable visually or hearing  
24  
25 661 impaired, or having a contra-indication for MRI-scans (e.g. having a pacemaker). Up to 50  
26  
27  
28 662 participants will be included in this side study. This side study will only be conducted at the  
29  
30  
31 663 Dutch study site.

32  
33 664 Once written informed consent is provided, participants who are included in this side  
34  
35 665 study will be asked to visit the Amsterdam University Medical Centre, location VUmc, for an  
36  
37 666 fMRI scan twice during the study period: at baseline and at 6-month follow-up visit. Prior to  
38  
39  
40 667 the fMRI-scan, additional salivary and blood samples will be collected for determination of  
41  
42 668 additional nutritional and microbial biomarkers. The protocol for the fMRI experiments have  
43  
44 669 been previously described (85, 86).  
45  
46  
47 670

## 48 49 671 **Discussion**

50  
51 672 There is an ongoing discussion whether the EFSA RDA of 0.8 g protein /kg BW/d is  
52  
53 673 sufficient for older adults and whether it should be increased to at least 1.0-1.2 g protein/kg  
54  
55 674 BW/d to support muscle health and functioning. National guidelines of some European  
56  
57  
58 675 countries already increased their RDA, i.e. the RDA of the German-speaking countries (D-A-  
59  
60

1  
2  
3 676 CH) is increased to 1.0 g/kg BW/d (87), and the Nordic Nutrition Recommendation has  
4  
5 677 increased their RDA to 1.2 g/kg BW/d (88). The PROMISS trial is the first RCT which will  
6  
7 678 investigate the effect of personalized dietary advice aiming at increasing protein intake and  
8  
9 679 the combined effect of personalized dietary advice aiming at increasing protein and the  
10  
11 680 timing of protein intake in close proximity of usual physical activity, on change in physical  
12  
13 681 functioning after 6 months among community-dwelling older adults ( $\geq 65$  y) with a habitual  
14  
15 682 protein intake of  $< 1.0$  g/kg adjusted (a)BW/d. The PROMISS trial will therefore provide  
16  
17 683 additional insight to the question whether the current EFSA RDA for protein for older adults  
18  
19 684 should be increased to 1.2 g/kg aBW/d, and whether optimal timing of protein intake will  
20  
21 685 additionally benefit physical functioning.  
22  
23  
24  
25  
26  
27

28 687 A strong and unique aspect of the PROMISS trial is that we will include participants with a  
29  
30 688 habitual protein intake  $< 1.0$  g/kg aBW/d, excluding those with a BMI  $< 18.5$  and  $> 32.0$   
31  
32 689 kg/m<sup>2</sup>. This will allow us to examine the effects of increasing protein intake from  $< 1.0$  to at  
33  
34 690 least 1.2 g/kg aBW/d. An innovative component of our study is that we will investigate the  
35  
36 691 combined benefit of increasing protein intake and timing of protein intake with usual physical  
37  
38 692 activity on physical functioning and other health related outcomes. Another strength is that in  
39  
40 693 our study the intervention is based on personalized dietary advice which is likely more  
41  
42 694 feasible in the long term to maintain in everyday life, compared to providing custom-prepared  
43  
44 695 meals (19) or protein supplements (89, 90), as done in most other studies. Finally, we will be  
45  
46 696 able to investigate the effect of persuasive technology on adherence to the dietary advice  
47  
48 697 strategy, and the effect of the dietary advice on the microbiota composition and on central  
49  
50 698 responses to food-cues in brain areas involved in appetite regulation. One limitation of this  
51  
52 699 study is that the biological value of the total protein intake (i.e. type of amino acids) is  
53  
54 700 unknown. Another limitation is that the duration of the trial might not be long enough to  
55  
56  
57  
58  
59  
60



1  
2  
3 701 observe a sufficient amount of incident cases of e.g. risk of malnutrition, frailty or risk of  
4  
5 702 sarcopenia.

6  
7  
8 703  
9  
10 704 In summary, this randomized controlled trial will demonstrate the effectiveness of  
11  
12 705 personalized dietary advice aiming at increasing protein intake to at least 1.2 g protein/kg  
13  
14 706 BW/d on physical functioning in older adults with a lower habitual protein intake, with or  
15  
16  
17 707 without the advice to consume protein in close proximity of usual physical activity.

18  
19 708

20  
21 709 **Ethics and disseminations**

22  
23  
24 710 The study has been approved by the Ethics Committee of the Helsinki University Central  
25  
26 711 Hospital, Finland (ID of the approval; HUS/1530/2018) and The Medical Ethical Committee  
27  
28 712 of the Amsterdam UMC, location VUmc, Amsterdam, the Netherlands (ID of the approval;  
29  
30 713 2018.399). Oral informed consent will be obtained from each participants before the  
31  
32  
33 714 screening procedure and written informed (please see appendix II) consent will be obtained  
34  
35 715 from each participant before any measurement take place. Personal data were not identifiable  
36  
37 716 during the analysis.

38  
39  
40 717

41  
42 718 Results will be send to national and international conferences and will submitted for  
43  
44 719 publication in peer-reviewed journals. In addition, lay abstracts will be made available for  
45  
46 720 participants and the public. Links to research output and dissemination activities will be made  
47  
48  
49 721 available on the PROMISS website, available at [www.promiss-vu.eu](http://www.promiss-vu.eu) and social media  
50  
51 722 channels.



723 **References**

724

- 725 1. EFSA. Scientific Opinion on Dietary Reference Values for protein. EFSA Panel on  
726 Dietetic Products, Nutrition and Allergies (NDA). EFSA Journal. 2012;10:2257.
- 727 2. Bauer J, Biolo G, Cederholm T, Cesari M, Cruz-Jentoft AJ, Morley JE, et al.  
728 Evidence-based recommendations for optimal dietary protein intake in older people: a  
729 position paper from the PROT-AGE Study Group. J Am Med Dir Assoc.  
730 2013;14:542-559.
- 731 3. Deutz NE, Bauer JM, Barazzoni R, Biolo G, Boirie Y, Bony-Westphal A, et al.  
732 Protein intake and exercise for optimal muscle function with aging: recommendations  
733 from the ESPEN Expert Group. Clin Nutr. 2014;33:929-936.
- 734 4. Cuthbertson D, Smith K, Babraj J, Leese G, Waddell T, Atherton P, et al. Anabolic  
735 signaling deficits underlie amino acid resistance of wasting, aging muscle. FASEB J.  
736 2005;19:422-424.
- 737 5. Moore DR, Churchward-Venne TA, Witard O, Breen L, Burd NA, Tipton KD, et al.  
738 Protein ingestion to stimulate myofibrillar protein synthesis requires greater relative  
739 protein intakes in healthy older versus younger men. J Gerontol A Biol Sci Med Sci.  
740 2015;70:57-62.
- 741 6. Wall BT, Gorissen SH, Pennings B, Koopman R, Groen BB, Verdijk LB, et al. Aging  
742 Is Accompanied by a Blunted Muscle Protein Synthetic Response to Protein  
743 Ingestion. PLoS One. 2015;10:e0140903.
- 744 7. Murphy CH, Saddler NI, Devries MC, McGlory C, Baker SK, Phillips SM. Leucine  
745 supplementation enhances integrative myofibrillar protein synthesis in free-living  
746 older men consuming lower- and higher-protein diets: a parallel-group crossover  
747 study. Am J Clin Nutr. 2016;104:1594-1606.

- 1  
2  
3 748 8. Holwerda AM, Paulussen KJM, Overkamp M, Goessens JPB, Kramer IF, Wodzig W,  
4  
5 749 et al. Dose-Dependent Increases in Whole-Body Net Protein Balance and Dietary  
6  
7 750 Protein-Derived Amino Acid Incorporation into Myofibrillar Protein During  
8  
9 751 Recovery from Resistance Exercise in Older Men. *J Nutr.* 2019;149:221-230.  
10  
11  
12 752 9. Houston DK, Nicklas BJ, Ding J, Harris TB, Tylavsky FA, Newman AB, et al.  
13  
14 753 Dietary protein intake is associated with lean mass change in older, community-  
15  
16 754 dwelling adults: the Health, Aging, and Body Composition (Health ABC) Study. *Am*  
17  
18 755 *J Clin Nutr.* 2008;87:150-155.  
19  
20  
21 756 10. Houston DK, Tooze JA, Garcia K, Visser M, Rubin S, Harris TB, et al. Protein Intake  
22  
23 757 and Mobility Limitation in Community-Dwelling Older Adults: the Health ABC  
24  
25 758 Study. *J Am Geriatr Soc.* 2017;65:1705-1711.  
26  
27  
28 759 11. Gray-Donald K, St-Arnaud-McKenzie D, Gaudreau P, Morais JA, Shatenstein B,  
29  
30 760 Payette H. Protein intake protects against weight loss in healthy community-dwelling  
31  
32 761 older adults. *J Nutr.* 2014;144:321-326.  
33  
34  
35 762 12. Mendonca N, Granic A, Hill TR, Siervo M, Mathers JC, Kingston A, et al. Protein  
36  
37 763 Intake and Disability Trajectories in Very Old Adults: The Newcastle 85+ Study. *J*  
38  
39 764 *Am Geriatr Soc.* 2019;67:50-56.  
40  
41  
42 765 13. Ten Haaf DSM, Nuijten MAH, Maessen MFH, Horstman AMH, Eijsvogels TMH,  
43  
44 766 Hopman MTE. Effects of protein supplementation on lean body mass, muscle  
45  
46 767 strength, and physical performance in nonfrail community-dwelling older adults: a  
47  
48 768 systematic review and meta-analysis. *Am J Clin Nutr.* 2018;108:1043-1059.  
49  
50  
51 769 14. Layman DK. Dietary Guidelines should reflect new understandings about adult  
52  
53 770 protein needs. *Nutr Metab (Lond).* 2009;6:12.  
54  
55  
56 771 15. Paddon-Jones D, Campbell WW, Jacques PF, Kritchevsky SB, Moore LL, Rodriguez  
57  
58 772 NR, et al. Protein and healthy aging. *Am J Clin Nutr.* 2015;  
59  
60

- 1  
2  
3 773 16. Park Y, Choi JE, Hwang HS. Protein supplementation improves muscle mass and  
4  
5 774 physical performance in undernourished prefrail and frail elderly subjects: a  
6  
7 775 randomized, double-blind, placebo-controlled trial. *Am J Clin Nutr.* 2018;108:1026-  
8  
9 776 1033.
- 10  
11  
12 777 17. Ten Haaf DSM, Eijsvogels TMH, Bongers C, Horstman AMH, Timmers S, de Groot  
13  
14 778 L, et al. Protein supplementation improves lean body mass in physically active older  
15  
16 779 adults: a randomized placebo-controlled trial. *J Cachexia Sarcopenia Muscle.* 2019;  
17  
18 780 18. Beelen J, de Roos NM, de Groot L. A 12-week intervention with protein-enriched  
19  
20 781 foods and drinks improved protein intake but not physical performance of older  
21  
22 782 patients during the first 6 months after hospital release: a randomised controlled trial.  
23  
24 783 *Br J Nutr.* 2017;117:1541-1549.
- 25  
26  
27 784 19. Bhasin S, Apovian CM, Travison TG, Pencina K, Moore LL, Huang G, et al. Effect of  
28  
29 785 Protein Intake on Lean Body Mass in Functionally Limited Older Men: A  
30  
31 786 Randomized Clinical Trial. *JAMA Intern Med.* 2018;178:530-541.
- 32  
33  
34 787 20. Cermak NM, Res PT, de Groot LC, Saris WH, van Loon LJ. Protein supplementation  
35  
36 788 augments the adaptive response of skeletal muscle to resistance-type exercise training:  
37  
38 789 a meta-analysis. *Am J Clin Nutr.* 2012;96:1454-1464.
- 39  
40  
41 790 21. Finger D, Goltz FR, Umpierre D, Meyer E, Rosa LH, Schneider CD. Effects of  
42  
43 791 protein supplementation in older adults undergoing resistance training: a systematic  
44  
45 792 review and meta-analysis. *Sports Med.* 2015;45:245-255.
- 46  
47  
48 793 22. Rondanelli M, Klersy C, Terracol G, Talluri J, Mageri R, Guido D, et al. Whey  
49  
50 794 protein, amino acids, and vitamin D supplementation with physical activity increases  
51  
52 795 fat-free mass and strength, functionality, and quality of life and decreases  
53  
54 796 inflammation in sarcopenic elderly. *Am J Clin Nutr.* 2016;103:830-840.  
55  
56  
57  
58  
59  
60

- 1  
2  
3 797 23. Liao CD, Tsauo JY, Wu YT, Cheng CP, Chen HC, Huang YC, et al. Effects of  
4  
5 798 protein supplementation combined with resistance exercise on body composition and  
6  
7 799 physical function in older adults: a systematic review and meta-analysis. *Am J Clin*  
8  
9 800 *Nutr.* 2017;106:1078-1091.
- 11 801 24. Englund DA, Kim DR, Koochek A, Zhu H, Trivison TG, Reid KF, et al. Nutritional  
12  
13 802 Supplementation With Physical Activity Improves Muscle Composition in Mobility-  
14  
15 803 Limited Older Adults, The VIVE2 Study: A Randomized, Double-Blind, Placebo-  
16  
17 804 Controlled Trial. *J Gerontol A Biol Sci Med Sci.* 2017;73:95-101.
- 19 805 25. Mori H, Tokuda Y. Effect of whey protein supplementation after resistance exercise  
20  
21 806 on the muscle mass and physical function of healthy older women: A randomized  
22  
23 807 controlled trial. *Geriatr Gerontol Int.* 2018;18:1398-1404.
- 25 808 26. Seino S, Sumi K, Narita M, Yokoyama Y, Ashida K, Kitamura A, et al. Effects of  
26  
27 809 Low-Dose Dairy Protein Plus Micronutrient Supplementation during Resistance  
28  
29 810 Exercise on Muscle Mass and Physical Performance in Older Adults: A Randomized,  
30  
31 811 Controlled Trial. *J Nutr Health Aging.* 2018;22:59-67.
- 33 812 27. Cribb PJ, Hayes A. Effects of supplement timing and resistance exercise on skeletal  
34  
35 813 muscle hypertrophy. *Med Sci Sports Exerc.* 2006;38:1918-1925.
- 37 814 28. Saunders JB, Aasland OG, Babor TF, de la Fuente JR, Grant M. Development of the  
38  
39 815 Alcohol Use Disorders Identification Test (AUDIT): WHO Collaborative Project on  
40  
41 816 Early Detection of Persons with Harmful Alcohol Consumption--II. *Addiction.*  
42  
43 817 1993;88:791-804.
- 45 818 29. Folstein MF, Folstein SE, McHugh PR. "Mini-mental state". A practical method for  
46  
47 819 grading the cognitive state of patients for the clinician. *J Psychiatr Res.* 1975;12:189-  
48  
49 820 198.
- 51  
52  
53  
54  
55  
56  
57  
58  
59  
60

- 1  
2  
3 821 30. Cederholm T, Jensen GL, Correia M, Gonzalez MC, Fukushima R, Higashiguchi T, et  
4  
5 822 al. GLIM criteria for the diagnosis of malnutrition - A consensus report from the  
6  
7 823 global clinical nutrition community. *Clin Nutr.* 2019;38:1-9.
- 8  
9  
10 824 31. Kim S, Leng XI, Kritchevsky SB. Body Composition and Physical Function in Older  
11  
12 825 Adults with Various Comorbidities. *Innov Aging.* 2017;1:igx008.
- 13  
14 826 32. Vincent HK, Vincent KR, Lamb KM. Obesity and mobility disability in the older  
15  
16 827 adult. *Obes Rev.* 2010;11:568-579.
- 17  
18  
19 828 33. Kritchevsky SB, Beavers KM, Miller ME, Shea MK, Houston DK, Kitzman DW, et  
20  
21 829 al. Intentional weight loss and all-cause mortality: a meta-analysis of randomized  
22  
23 830 clinical trials. *PLoS One.* 2015;10:e0121993.
- 24  
25  
26 831 34. Fouque D, Aparicio M. Eleven reasons to control the protein intake of patients with  
27  
28 832 chronic kidney disease. *Nat Clin Pract Nephrol.* 2007;3:383-392.
- 29  
30  
31 833 35. Fouque D, Pelletier S, Mafra D, Chauveau P. Nutrition and chronic kidney disease.  
32  
33 834 *Kidney Int.* 2011;80:348-357.
- 34  
35  
36 835 36. Eyre S, Attman PO, Haraldsson B. Positive effects of protein restriction in patients  
37  
38 836 with chronic kidney disease. *J Ren Nutr.* 2008;18:269-280.
- 39  
40 837 37. Berner LA, Becker G, Wise M, Doi J. Characterization of dietary protein among older  
41  
42 838 adults in the United States: amount, animal sources, and meal patterns. *J Acad Nutr*  
43  
44 839 *Diet.* 2013;113:809-815.
- 45  
46  
47 840 38. Wijnhoven HAH, Elstgeest LEM, de Vet HCW, Nicolaou M, Snijder MB, Visser M.  
48  
49 841 Development and validation of a short food questionnaire to screen for low protein  
50  
51 842 intake in community-dwelling older adults: The Protein Screener 55+ (Pro55+). *PLoS*  
52  
53 843 *One.* 2018;13:e0196406.
- 54  
55  
56 844 39. The National Institute for Health and Welfare. Fineli: the National Food Composition  
57  
58 845 Database in Finland. [Available from: <https://fineli.fi/fineli/en/index?>
- 59  
60

- 1  
2  
3 846 40. Nederlands Voedingsstoffenbestand 2016 (Dutch Food Composition Table 2016):  
4  
5 847 Voedingscentrum 2016; [Available from: <https://nevo-online.rivm.nl/>.  
6  
7  
8 848 41. Simonsick EM, Montgomery PS, Newman AB, Bauer DC, Harris T. Measuring  
9  
10 849 fitness in healthy older adults: the Health ABC Long Distance Corridor Walk. *J Am*  
11  
12 850 *Geriatr Soc.* 2001;49:1544-1548.  
13  
14 851 42. Simonsick EM, Fan E, Fleg JL. Estimating cardiorespiratory fitness in well-  
15  
16 852 functioning older adults: treadmill validation of the long distance corridor walk. *J Am*  
17  
18 853 *Geriatr Soc.* 2006;54:127-132.  
19  
20 854 43. Guralnik JM, Simonsick EM, Ferrucci L, Glynn RJ, Berkman LF, Blazer DG, et al. A  
21  
22 855 short physical performance battery assessing lower extremity function: association  
23  
24 856 with self-reported disability and prediction of mortality and nursing home admission.  
25  
26 857 *J Gerontol.* 1994;49:M85-94.  
27  
28  
29 858 44. Malmstrom TK, Morley JE. SARC-F: a simple questionnaire to rapidly diagnose  
30  
31 859 sarcopenia. *J Am Med Dir Assoc.* 2013;14:531-532.  
32  
33  
34 860 45. Fried LP, Tangen CM, Walston J, Newman AB, Hirsch C, Gottdiener J, et al. Frailty  
35  
36 861 in older adults: evidence for a phenotype. *J Gerontol A Biol Sci Med Sci.*  
37  
38 862 2001;56:M146-156.  
39  
40  
41 863 46. EuroQol G. EuroQol--a new facility for the measurement of health-related quality of  
42  
43 864 life. *Health Policy.* 1990;16:199-208.  
44  
45  
46 865 47. Wimo A. Evaluation of the resource utilization and caregiver time in Anti-dementia  
47  
48 866 drug trials-a quantitative battery. *The health economics of dementia.* 1998;  
49  
50  
51 867 48. Wilson MM, Thomas DR, Rubenstein LZ, Chibnall JT, Anderson S, Baxi A, et al.  
52  
53 868 Appetite assessment: simple appetite questionnaire predicts weight loss in  
54  
55 869 community-dwelling adults and nursing home residents. *Am J Clin Nutr.*  
56  
57 870 2005;82:1074-1081.  
58  
59  
60

- 1  
2  
3 871 49. English KL, Paddon-Jones D. Protecting muscle mass and function in older adults  
4  
5 872 during bed rest. *Curr Opin Clin Nutr Metab Care*. 2010;13:34-39.  
6  
7 873 50. Paddon-Jones D, Rasmussen BB. Dietary protein recommendations and the  
8  
9 874 prevention of sarcopenia. *Curr Opin Clin Nutr Metab Care*. 2009;12:86-90.  
10  
11 875 51. Deutz NE, Wolfe RR. Is there a maximal anabolic response to protein intake with a  
12  
13 876 meal? *Clin Nutr*. 2013;32:309-313.  
14  
15 877 52. Nabuco HCG, Tomeleri CM, Sugihara Junior P, Fernandes RR, Cavalcante EF,  
16  
17 878 Antunes M, et al. Effects of Whey Protein Supplementation Pre- or Post-Resistance  
18  
19 879 Training on Muscle Mass, Muscular Strength, and Functional Capacity in Pre-  
20  
21 880 Conditioned Older Women: A Randomized Clinical Trial. *Nutrients*. 2018;10:  
22  
23 881 53. Newman AB, Simonsick EM, Naydeck BL, Boudreau RM, Kritchevsky SB, Nevitt  
24  
25 882 MC, et al. Association of long-distance corridor walk performance with mortality,  
26  
27 883 cardiovascular disease, mobility limitation, and disability. *JAMA*. 2006;295:2018-  
28  
29 884 2026.  
30  
31 885 54. Beaudart C, Rolland Y, Cruz-Jentoft AJ, Bauer JM, Sieber C, Cooper C, et al.  
32  
33 886 Assessment of Muscle Function and Physical Performance in Daily Clinical Practice :  
34  
35 887 A position paper endorsed by the European Society for Clinical and Economic  
36  
37 888 Aspects of Osteoporosis, Osteoarthritis and Musculoskeletal Diseases (ESCEO).  
38  
39 889 *Calcif Tissue Int*. 2019;105:1-14.  
40  
41 890 55. Sayers SP, Guralnik JM, Newman AB, Brach JS, Fielding RA. Concordance and  
42  
43 891 discordance between two measures of lower extremity function: 400 meter self-paced  
44  
45 892 walk and SPPB. *Aging Clin Exp Res*. 2006;18:100-106.  
46  
47 893 56. Rantanen T, Era P, Heikkinen E. Maximal Isometric Muscle Strength and  
48  
49 894 Socioeconomic Status, Health, and Physical Activity in 75-Year-Old Persons. *Journal*  
50  
51 895 *of Aging and Physical Activity*. 1994;2:206-220.  
52  
53  
54  
55  
56  
57  
58  
59  
60



- 1  
2  
3 896 57. Rijk JM, Roos PR, Deckx L, van den Akker M, Buntinx F. Prognostic value of  
4  
5 897 handgrip strength in people aged 60 years and older: A systematic review and meta-  
6  
7 898 analysis. *Geriatr Gerontol Int.* 2016;16:5-20.  
9  
10 899 58. Wu Y, Wang W, Liu T, Zhang D. Association of Grip Strength With Risk of All-  
11  
12 900 Cause Mortality, Cardiovascular Diseases, and Cancer in Community-Dwelling  
13  
14 901 Populations: A Meta-analysis of Prospective Cohort Studies. *J Am Med Dir Assoc.*  
15  
16 902 2017;18:551 e517-551 e535.  
18  
19 903 59. Roberts HC, Denison HJ, Martin HJ, Patel HP, Syddall H, Cooper C, et al. A review  
20  
21 904 of the measurement of grip strength in clinical and epidemiological studies: towards a  
22  
23 905 standardised approach. *Age Ageing.* 2011;40:423-429.  
25  
26 906 60. Visser M, Goodpaster BH, Kritchevsky SB, Newman AB, Nevitt M, Rubin SM, et al.  
27  
28 907 Muscle mass, muscle strength, and muscle fat infiltration as predictors of incident  
29  
30 908 mobility limitations in well-functioning older persons. *J Gerontol A Biol Sci Med Sci.*  
31  
32 909 2005;60:324-333.  
34  
35 910 61. Reinders I, Murphy RA, Koster A, Brouwer IA, Visser M, Garcia ME, et al. Muscle  
36  
37 911 Quality and Muscle Fat Infiltration in Relation to Incident Mobility Disability and  
38  
39 912 Gait Speed Decline: the Age, Gene/Environment Susceptibility-Reykjavik Study. *J*  
40  
41 913 *Gerontol A Biol Sci Med Sci.* 2015;70:1030-1036.  
43  
44 914 62. Reinders I, Murphy RA, Brouwer IA, Visser M, Launer L, Siggeirsdottir K, et al.  
45  
46 915 Muscle Quality and Myosteatosis: Novel Associations With Mortality Risk: The Age,  
47  
48 916 Gene/Environment Susceptibility (AGES)-Reykjavik Study. *Am J Epidemiol.*  
49  
50 917 2016;183:53-60.  
52  
53 918 63. Volaklis KA, Halle M, Meisinger C. Muscular strength as a strong predictor of  
54  
55 919 mortality: A narrative review. *Eur J Intern Med.* 2015;26:303-310.  
57  
58  
59  
60



- 1  
2  
3 920 64. Garcia-Hermoso A, Cavero-Redondo I, Ramirez-Velez R, Ruiz JR, Ortega FB, Lee  
4  
5 921 DC, et al. Muscular Strength as a Predictor of All-Cause Mortality in an Apparently  
6  
7 922 Healthy Population: A Systematic Review and Meta-Analysis of Data From  
8  
9 923 Approximately 2 Million Men and Women. *Arch Phys Med Rehabil.* 2018;99:2100-  
10  
11 924 2113 e2105.
- 12  
13  
14 925 65. Gerrits HL, Hopman MT, Sargeant AJ, de Haan A. Reproducibility of contractile  
15  
16 926 properties of the human paralysed and non-paralysed quadriceps muscle. *Clin Physiol.*  
17  
18 927 2001;21:105-113.
- 19  
20  
21 928 66. Kyle UG, Genton L, Karsegard L, Slosman DO, Pichard C. Single prediction equation  
22  
23 929 for bioelectrical impedance analysis in adults aged 20--94 years. *Nutrition.*  
24  
25 930 2001;17:248-253.
- 26  
27  
28 931 67. Sergi G, De Rui M, Veronese N, Bolzetta F, Berton L, Carraro S, et al. Assessing  
29  
30 932 appendicular skeletal muscle mass with bioelectrical impedance analysis in free-living  
31  
32 933 Caucasian older adults. *Clin Nutr.* 2015;34:667-673.
- 33  
34  
35 934 68. McCrory MA, Gomez TD, Bernauer EM, Mole PA. Evaluation of a new air  
36  
37 935 displacement plethysmograph for measuring human body composition. *Med Sci*  
38  
39 936 *Sports Exerc.* 1995;27:1686-1691.
- 40  
41  
42 937 69. Radloff LS. The CES-D Scale: A Self-Report Depression Scale for Research in the  
43  
44 938 General Population. *Appl Psychol Meas.* 1977;1:385-401.
- 45  
46  
47 939 70. Perera S, Studenski S, Newman A, Simonsick E, Harris T, Schwartz A, et al. Are  
48  
49 940 estimates of meaningful decline in mobility performance consistent among clinically  
50  
51 941 important subgroups? (Health ABC study). *J Gerontol A Biol Sci Med Sci.*  
52  
53 942 2014;69:1260-1268.
- 54  
55  
56 943 71. Schulz KF, Altman DG, Moher D, Group C. CONSORT 2010 Statement: updated  
57  
58 944 guidelines for reporting parallel group randomised trials. *BMC Med.* 2010;8:18.  
59  
60

- 1  
2  
3 945 72. Reinders I, Visser M, Wijnhoven HAH. Two dietary advice strategies to increase  
4  
5 946 protein intake among community-dwelling older adults: A feasibility study. *Clin Nutr*  
6  
7 947 *ESPEN*. 2020;37:157-167.
- 8  
9  
10 948 73. Lubbe LMvd, Klein MCA. Designing a system with persuasive communication to  
11  
12 949 improve diet compliance for elderly users. *Proceedings of the 13th EAI International*  
13  
14 950 *Conference on Pervasive Computing Technologies for Healthcare; Trento, Italy*.  
15  
16 951 3329217: ACM; 2019. p. 234-241.
- 17  
18  
19 952 74. Sender R, Fuchs S, Milo R. Are We Really Vastly Outnumbered? Revisiting the Ratio  
20  
21 953 of Bacterial to Host Cells in Humans. *Cell*. 2016;164:337-340.
- 22  
23  
24 954 75. Schroeder BO, Backhed F. Signals from the gut microbiota to distant organs in  
25  
26 955 physiology and disease. *Nat Med*. 2016;22:1079-1089.
- 27  
28  
29 956 76. Biagi E, Nylund L, Candela M, Ostan R, Bucci L, Pini E, et al. Through ageing, and  
30  
31 957 beyond: gut microbiota and inflammatory status in seniors and centenarians. *PLoS*  
32  
33 958 *One*. 2010;5:e10667.
- 34  
35  
36 959 77. Odamaki T, Kato K, Sugahara H, Hashikura N, Takahashi S, Xiao JZ, et al. Age-  
37  
38 960 related changes in gut microbiota composition from newborn to centenarian: a cross-  
39  
40 961 sectional study. *BMC Microbiol*. 2016;16:90.
- 41  
42  
43 962 78. David LA, Maurice CF, Carmody RN, Gootenberg DB, Button JE, Wolfe BE, et al.  
44  
45 963 Diet rapidly and reproducibly alters the human gut microbiome. *Nature*.  
46  
47 964 2014;505:559-563.
- 48  
49 965 79. Yamashita Y, Takeshita T. The oral microbiome and human health. *J Oral Sci*.  
50  
51 966 2017;59:201-206.
- 52  
53  
54 967 80. Testa M, Erbiti S, Delgado A, Cardenas IL. Evaluation of oral microbiota in  
55  
56 968 undernourished and eutrophic children using checkerboard DNA-DNA hybridization.  
57  
58 969 *Anaerobe*. 2016;42:55-59.  
59  
60

- 1  
2  
3 970 81. Deschasaux M, Bouter KE, Prodan A, Levin E, Groen AK, Herrema H, et al.  
4  
5 971 Depicting the composition of gut microbiota in a population with varied ethnic origins  
6  
7 972 but shared geography. *Nat Med*. 2018;24:1526-1531.  
8  
9  
10 973 82. Bosch A, Levin E, van Houten MA, Hasrat R, Kalkman G, Biesbroek G, et al.  
11  
12 974 Development of Upper Respiratory Tract Microbiota in Infancy is Affected by Mode  
13  
14 975 of Delivery. *EBioMedicine*. 2016;9:336-345.  
15  
16  
17 976 83. Mollahosseini M, Shab-Bidar S, Rahimi MH, Djafarian K. Effect of whey protein  
18  
19 977 supplementation on long and short term appetite: A meta-analysis of randomized  
20  
21 978 controlled trials. *Clinical nutrition ESPEN*. 2017;20:34-40.  
22  
23  
24 979 84. van de Wouw M, Schellekens H, Dinan TG, Cryan JF. Microbiota-Gut-Brain Axis:  
25  
26 980 Modulator of Host Metabolism and Appetite. *J Nutr*. 2017;147:727-745.  
27  
28  
29 981 85. van Bloemendaal L, RG IJ, Ten Kulve JS, Barkhof F, Konrad RJ, Drent ML, et al.  
30  
31 982 GLP-1 receptor activation modulates appetite- and reward-related brain areas in  
32  
33 983 humans. *Diabetes*. 2014;63:4186-4196.  
34  
35  
36 984 86. van Bloemendaal L, Veltman DJ, Ten Kulve JS, Groot PF, Ruhe HG, Barkhof F, et al.  
37  
38 985 Brain reward-system activation in response to anticipation and consumption of  
39  
40 986 palatable food is altered by glucagon-like peptide-1 receptor activation in humans.  
41  
42 987 *Diabetes Obes Metab*. 2015;17:878-886.  
43  
44  
45 988 87. Nutrition reference intake values for the German Speaking Countries D-A-CH ed 2,  
46  
47 989 update 1 Bonn2016 [Available from:  
48  
49 990 <https://www.dge.de/wissenschaft/referenzwerte/protein/>.  
50  
51  
52 991 88. Nordic Council of Ministers. Nordic nutrition recommendations 2012. Integrating  
53  
54 992 nutrition physical activity; 2014. pp. 1e627. Copenhagen.  
55  
56  
57 993 89. Tieland M, Franssen R, Dullemeijer C, van Dronkelaar C, Kyung Kim H, Ispoglou T,  
58  
59 994 et al. The Impact of Dietary Protein or Amino Acid Supplementation on Muscle Mass  
60

- 1  
2  
3 995 and Strength in Elderly People: Individual Participant Data and Meta-Analysis of  
4  
5 996 RCT's. J Nutr Health Aging. 2017;21:994-1001.  
6  
7  
8 997 90. Reinders I, Volkert D, de Groot L, Beck AM, Feldblum I, Jobse I, et al. Effectiveness  
9  
10 998 of nutritional interventions in older adults at risk of malnutrition across different  
11  
12 999 health care settings: Pooled analyses of individual participant data from nine  
13  
14 1000 randomized controlled trials. Clin Nutr. 2019;38:1797-1806.  
15  
16  
17 1001

For peer review only

1  
2  
3 1002 **Author Contributions**  
4

5 1003 *IR, HAHW, IAB, MRO* and *MV* obtained funding for the PROMISS project. *IR* and *HAHW*  
6  
7 1004 coordinate the trial center at the Vrije Universiteit Amsterdam, the Netherlands. *SKJ* and  
8  
9 1005 *MHS* coordinate the trial center at the Helsinki University, Finland. All authors contributed to  
10  
11 1006 conception of and designing the trial. *IR* drafted the manuscript. *JB* provided cost-  
12  
13 1007 effectiveness expertise in clinical trial design. *LDK* provided statistical expertise and will  
14  
15 1008 conduct the primary statistical analysis. *KSF* drafted the sections for the microbiota and fMRI  
16  
17 1009 ancillary studies. *MCAK* and *LML* drafted the section for the persuasive technology study.  
18  
19 1010 *HAHW, SKJ, MHS, RN, IAB, MRO, KHP, RV* and *MV* critically reviewed the manuscript. All  
20  
21 1011 authors approved the final version.  
22  
23  
24  
25

26 1012

27  
28 1013 **Funding**  
29

30 1014 Funding for this research is provided by EU Horizon 2020 PROMISS Project ‘Prevention Of  
31  
32 1015 Malnutrition In Senior Subjects in the EU’, Grant agreement no. 678732. Funding sponsors  
33  
34 1016 did not participate in the study design, collection, management, analysis and interpretation of  
35  
36 1017 data; or writing of the manuscript. They did not participate in the decision to submit the  
37  
38 1018 report for publication, nor had ultimate authority over any of these activities.  
39  
40  
41

42 1019

43  
44 1020 **Competing interests**  
45

46 1021 The authors declare that they have no competing interests.  
47  
48

49 1022

50  
51 1023 **Protein enriched food products**  
52

53 1024 Protein enriched food products are provided by Kellogg and Fonterra. Costs for these  
54  
55 1025 products are also funded through the EU Horizon 2020 PROMISS grant.  
56  
57

58 1026  
59  
60

1  
2  
3 1027 **Consent for publication**  
4

5 1028 Not applicable. Personal data were not identifiable during the analysis.  
6  
7

8 1029  
9

10 1030 **Availability of data and materials**  
11

12 1031 Datasets from this research will be stored at the repository of the Vrije Universiteit  
13

14 1032 Amsterdam, the Netherlands and potentially available for other researchers after submitting a  
15

16 1033 research proposal.  
17  
18

19 1034  
20

21 1035 **Acknowledgements**  
22

23 1036 We acknowlegde the members of the PROMISS trial group and we thank the study  
24

25 1037 participants. We thank Jan de Vries for his ethical advice, and Martin den Heijer and Kaisu  
26  
27

28 1038 Pitkälä for their medical advice.  
29  
30  
31  
32  
33  
34  
35  
36  
37  
38  
39  
40  
41  
42  
43  
44  
45  
46  
47  
48  
49  
50  
51  
52  
53  
54  
55  
56  
57  
58  
59  
60

1  
2  
3 1039 **Figure legends**  
4

5 1040  
6

7  
8 1041 **Figure 1.** Study timeline of the PROMISS trial  
9

10  
11  
12  
13  
14  
15  
16  
17  
18  
19  
20  
21  
22  
23  
24  
25  
26  
27  
28  
29  
30  
31  
32  
33  
34  
35  
36  
37  
38  
39  
40  
41  
42  
43  
44  
45  
46  
47  
48  
49  
50  
51  
52  
53  
54  
55  
56  
57  
58  
59  
60

For peer review only

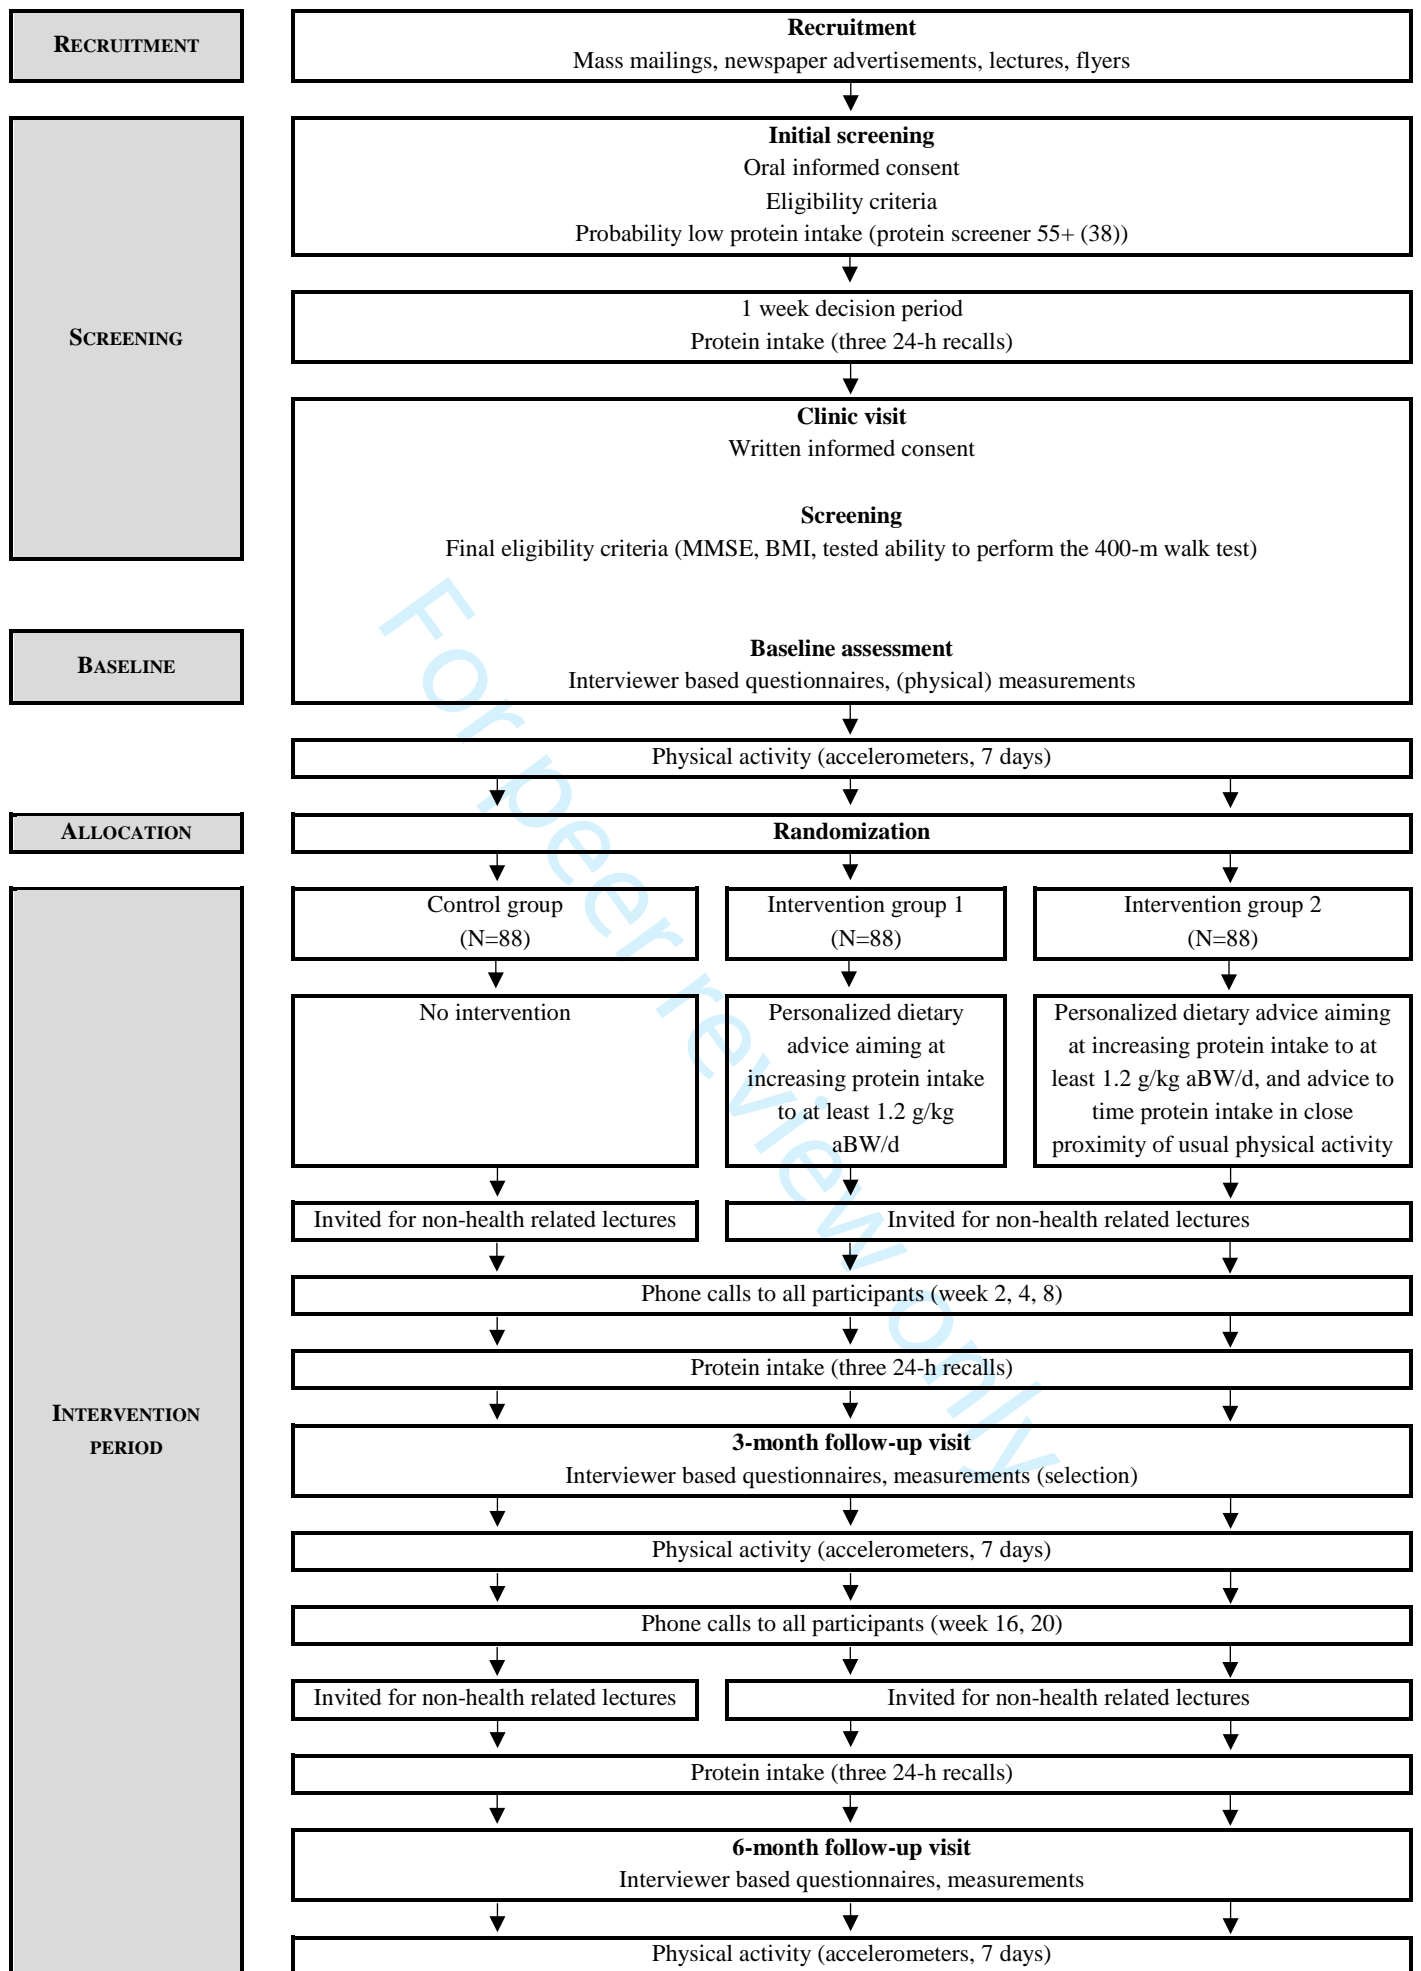



## Appendix

### Appendix I

#### **PROMISS project coordination, Vrije Universiteit Amsterdam, Department of Health Sciences, the Netherlands**

Prof. Marjolein Visser, PhD – Principle investigator of the PROMISS project

Prof. Ingeborg A Brouwer, PhD – Project manager of the PROMISS project

Margreet Olthof, PhD – Financial manager of the PROMISS project

Rachel Vijlbrief – Assistant project manager of the PROMISS project

#### *Trial sites*

##### Vrije Universiteit Amsterdam, the Netherlands

Hanneke Wijnhoven, PhD - local principal investigator

Nanouk Bakker Schut – research intern

Judith Bosmans, PhD – researcher

Mariska Bout – dietician and research assistant

Ingeborg Brouwer, PhD – researcher

Nona Kerremans – research intern

Lothar Kuijper, PhD – researcher

Margreet Olthof, PhD – researcher

Ilse Reinders, PhD – local co-principal investigator

Marjon Veeke – dietician and research assistant

Rachel Vijlbrief – researcher

Marjolein Visser, PhD – researcher

Merel Vrijmoeth – dietician and research assistant

1  
2  
3 Laura Winkens – researcher  
4  
5  
6  
7

8 University of Helsinki  
9

10 Merja Suominen, PhD – local principal investigator  
11

12 Kirsi Ali-Kovero – research assistant  
13

14 Johannes Anttila – research intern  
15

16 Aliisa Hyvönen – dietician and research assistant  
17

18 Henriikka Jussila – research intern  
19

20 Satu Jyväkorpi, PhD – local co-principal investigator  
21

22 Riikka Niskanen – dietician and research assistant  
23

24 Anna-Maria Piipponen – research intern and research assistant  
25

26 Kaisu Pitkälä, PhD – researcher  
27

28 Heli Salmenius-Suominen – researcher  
29  
30  
31  
32  
33  
34

35 *Ancillary studies*  
36

37 Persuasive technology study  
38

39 Michel Klein, PhD – principal investigator of the persuasive technology study, *Vrije*  
40

41 *Universiteit Amsterdam, the Netherlands*  
42

43 Laura van der Lubbe – researcher, *Vrije Universiteit Amsterdam, the Netherlands*  
44  
45  
46  
47  
48

49 Microbiota study and fMRI study  
50

51 Fredrik Bäckhed, MD, PhD – researcher, *University of Gothenburg, Gothenburg, Sweden and*  
52

53 *University of Copenhagen, Copenhagen, Denmark*  
54

55 Kristien Fluitman, MD – researcher, *Amsterdam UMC, location VUmc, Amsterdam, the*  
56

57 *Netherlands*  
58  
59  
60

1  
2  
3 Richard Ijzerman, MD, PhD – researcher, *Amsterdam UMC, location VUmc, Amsterdam, the*  
4  
5 *Netherlands*  
6

7  
8 Bart Keijser, PhD – researcher, *TNO earth, Zeist, the Netherlands and Academic Center for*  
9  
10 *Dentistry Amsterdam, the Netherlands*  
11

12  
13 Max Nieuwdorp, MD, PhD – principal investigator of the microbiota study and fMRI study,  
14  
15 *Amsterdam UMC, location AMC and location VUmc, Amsterdam, the Netherlands*  
16

17  
18  
19  
20  
21  
22  
23  
24  
25  
26  
27  
28  
29  
30  
31  
32  
33  
34  
35  
36  
37  
38  
39  
40  
41  
42  
43  
44  
45  
46  
47  
48  
49  
50  
51  
52  
53  
54  
55  
56  
57  
58  
59  
60

For peer review only

## Toestemmingsformulier proefpersoon

### Effectiviteit van het verhogen van eiwitname op fysiek functioneren

- Ik heb de informatiebrief gelezen. Ook kon ik vragen stellen. Mijn vragen zijn voldoende beantwoord. Ik had genoeg tijd om te beslissen of ik meedoe.
- Ik weet dat meedoen vrijwillig is. Ook weet ik dat ik op ieder moment kan beslissen om toch niet mee te doen of te stoppen met het onderzoek. Daarvoor hoef ik geen reden te geven.
- Ik geef toestemming voor het informeren van mijn huisarts dat ik meedoe aan dit onderzoek.
- Ik geef toestemming voor het informeren van mijn huisarts over eventuele afwijkingen die tijdens het onderzoek gevonden worden.
- Ik geef toestemming voor het opvragen van informatie bij mijn huisarts over mijn nierfunctie, mochten er twijfels over de effecten op mijn gezondheid bestaan.
- Ik weet dat sommige mensen mijn gegevens kunnen inzien. Die mensen staan vermeld in deze informatiebrief.
- Ik geef toestemming voor het verzamelen en gebruiken van mijn gegevens op de manier en voor de doelen die in de informatiebrief staan.
- Ik geef toestemming om mijn gegevens op de onderzoekslocatie nog 15 jaar na dit onderzoek te bewaren.
- Ik wil meedoen aan dit onderzoek.

Naam proefpersoon:

Handtekening:

Datum : \_\_ / \_\_ / \_\_

Ik verklaar dat ik deze proefpersoon volledig heb geïnformeerd over het genoemde onderzoek.

Als er tijdens het onderzoek informatie bekend wordt die de toestemming van de proefpersoon zou kunnen beïnvloeden, dan breng ik hem/haar daarvan tijdig op de hoogte.

Naam onderzoeker (of diens vertegenwoordiger):

Handtekening:

Datum: \_\_ / \_\_ / \_\_

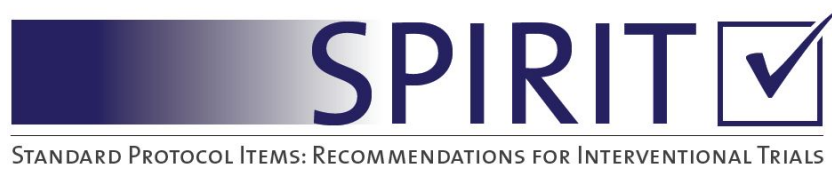

SPIRIT 2013 Checklist: Recommended items to address in a clinical trial protocol and related documents\*

| Section/item                      | ItemNo | Description                                                                                                                                                                                                                                                                              | Page number, section                |
|-----------------------------------|--------|------------------------------------------------------------------------------------------------------------------------------------------------------------------------------------------------------------------------------------------------------------------------------------------|-------------------------------------|
| <b>Administrative information</b> |        |                                                                                                                                                                                                                                                                                          |                                     |
| Title                             | 1      | Descriptive title identifying the study design, population, interventions, and, if applicable, trial acronym                                                                                                                                                                             | 1                                   |
| Trial registration                | 2a     | Trial identifier and registry name. If not yet registered, name of intended registry                                                                                                                                                                                                     | 4; end of abstract, 9; study design |
|                                   | 2b     | All items from the World Health Organization Trial Registration Data Set                                                                                                                                                                                                                 | N/A                                 |
| Protocol version                  | 3      | Date and version identifier                                                                                                                                                                                                                                                              | 4; trial status                     |
| Funding                           | 4      | Sources and types of financial, material, and other support                                                                                                                                                                                                                              | 49; funding                         |
| Roles and responsibilities        | 5a     | Names, affiliations, and roles of protocol contributors                                                                                                                                                                                                                                  | 1, 49; author contributions         |
|                                   | 5b     | Name and contact information for the trial sponsor                                                                                                                                                                                                                                       | -                                   |
|                                   | 5c     | Role of study sponsor and funders, if any, in study design; collection, management, analysis, and interpretation of data; writing of the report; and the decision to submit the report for publication, including whether they will have ultimate authority over any of these activities | 49; funding                         |
|                                   | 5d     | Composition, roles, and responsibilities of the coordinating centre, steering committee, endpoint adjudication committee, data management team, and other individuals or groups overseeing the trial, if applicable (see Item 21a for data monitoring committee)                         | Appendix II                         |

**Introduction**

|    |                                                           |     |                                                                                                                                                                                                                                                                                                                                                                                |                                                                       |  |
|----|-----------------------------------------------------------|-----|--------------------------------------------------------------------------------------------------------------------------------------------------------------------------------------------------------------------------------------------------------------------------------------------------------------------------------------------------------------------------------|-----------------------------------------------------------------------|--|
| 1  |                                                           |     |                                                                                                                                                                                                                                                                                                                                                                                |                                                                       |  |
| 2  | Background and rationale                                  | 6a  | Description of research question and justification for undertaking the trial, including summary of relevant studies (published and unpublished) examining benefits and harms for each intervention                                                                                                                                                                             | 6, 7, 8, 9                                                            |  |
| 3  |                                                           |     |                                                                                                                                                                                                                                                                                                                                                                                |                                                                       |  |
| 4  |                                                           |     |                                                                                                                                                                                                                                                                                                                                                                                |                                                                       |  |
| 5  |                                                           |     |                                                                                                                                                                                                                                                                                                                                                                                |                                                                       |  |
| 6  |                                                           |     |                                                                                                                                                                                                                                                                                                                                                                                |                                                                       |  |
| 7  |                                                           | 6b  | Explanation for choice of comparators                                                                                                                                                                                                                                                                                                                                          | 8                                                                     |  |
| 8  | Objectives                                                | 7   | Specific objectives or hypotheses                                                                                                                                                                                                                                                                                                                                              | 8; second paragraph                                                   |  |
| 9  |                                                           |     |                                                                                                                                                                                                                                                                                                                                                                                |                                                                       |  |
| 10 |                                                           |     |                                                                                                                                                                                                                                                                                                                                                                                |                                                                       |  |
| 11 |                                                           |     |                                                                                                                                                                                                                                                                                                                                                                                |                                                                       |  |
| 12 | Trial design                                              | 8   | Description of trial design including type of trial (eg, parallel group, crossover, factorial, single group), allocation ratio, and framework (eg, superiority, equivalence, noninferiority, exploratory)                                                                                                                                                                      | 9; study design                                                       |  |
| 13 |                                                           |     |                                                                                                                                                                                                                                                                                                                                                                                |                                                                       |  |
| 14 |                                                           |     |                                                                                                                                                                                                                                                                                                                                                                                |                                                                       |  |
| 15 |                                                           |     |                                                                                                                                                                                                                                                                                                                                                                                |                                                                       |  |
| 16 |                                                           |     |                                                                                                                                                                                                                                                                                                                                                                                |                                                                       |  |
| 17 |                                                           |     |                                                                                                                                                                                                                                                                                                                                                                                |                                                                       |  |
| 18 | <b>Methods: Participants, interventions, and outcomes</b> |     |                                                                                                                                                                                                                                                                                                                                                                                |                                                                       |  |
| 19 |                                                           |     |                                                                                                                                                                                                                                                                                                                                                                                |                                                                       |  |
| 20 | Study setting                                             | 9   | Description of study settings (eg, community clinic, academic hospital) and list of countries where data will be collected. Reference to where list of study sites can be obtained                                                                                                                                                                                             | 9-11; eligibility criteria, 12-14; recruitment and screening          |  |
| 21 |                                                           |     |                                                                                                                                                                                                                                                                                                                                                                                |                                                                       |  |
| 22 |                                                           |     |                                                                                                                                                                                                                                                                                                                                                                                |                                                                       |  |
| 23 | Eligibility criteria                                      | 10  | Inclusion and exclusion criteria for participants. If applicable, eligibility criteria for study centres and individuals who will perform the interventions (eg, surgeons, psychotherapists)                                                                                                                                                                                   | 9-11; eligibility criteria                                            |  |
| 24 |                                                           |     |                                                                                                                                                                                                                                                                                                                                                                                |                                                                       |  |
| 25 |                                                           |     |                                                                                                                                                                                                                                                                                                                                                                                |                                                                       |  |
| 26 | Interventions                                             | 11a | Interventions for each group with sufficient detail to allow replication, including how and when they will be administered                                                                                                                                                                                                                                                     | 16, 21-22; intervention                                               |  |
| 27 |                                                           |     |                                                                                                                                                                                                                                                                                                                                                                                |                                                                       |  |
| 28 |                                                           | 11b | Criteria for discontinuing or modifying allocated interventions for a given trial participant (eg, drug dose change in response to harms, participant request, or improving/worsening disease)                                                                                                                                                                                 | -                                                                     |  |
| 29 |                                                           |     |                                                                                                                                                                                                                                                                                                                                                                                |                                                                       |  |
| 30 |                                                           |     |                                                                                                                                                                                                                                                                                                                                                                                |                                                                       |  |
| 31 |                                                           | 11c | Strategies to improve adherence to intervention protocols, and any procedures for monitoring adherence (eg, drug tablet return, laboratory tests)                                                                                                                                                                                                                              | 22; compliance                                                        |  |
| 32 |                                                           |     |                                                                                                                                                                                                                                                                                                                                                                                |                                                                       |  |
| 33 |                                                           | 11d | Relevant concomitant care and interventions that are permitted or prohibited during the trial                                                                                                                                                                                                                                                                                  | -                                                                     |  |
| 34 |                                                           |     |                                                                                                                                                                                                                                                                                                                                                                                |                                                                       |  |
| 35 |                                                           |     |                                                                                                                                                                                                                                                                                                                                                                                |                                                                       |  |
| 36 | Outcomes                                                  | 12  | Primary, secondary, and other outcomes, including the specific measurement variable (eg, systolic blood pressure), analysis metric (eg, change from baseline, final value, time to event), method of aggregation (eg, median, proportion), and time point for each outcome. Explanation of the clinical relevance of chosen efficacy and harm outcomes is strongly recommended | 23; primary outcome, 23-26; secondary outcomes, 26-27; other measures |  |
| 37 |                                                           |     |                                                                                                                                                                                                                                                                                                                                                                                |                                                                       |  |
| 38 |                                                           |     |                                                                                                                                                                                                                                                                                                                                                                                |                                                                       |  |
| 39 |                                                           |     |                                                                                                                                                                                                                                                                                                                                                                                |                                                                       |  |
| 40 |                                                           |     |                                                                                                                                                                                                                                                                                                                                                                                |                                                                       |  |
| 41 |                                                           |     |                                                                                                                                                                                                                                                                                                                                                                                |                                                                       |  |
| 42 |                                                           |     |                                                                                                                                                                                                                                                                                                                                                                                |                                                                       |  |
| 43 |                                                           |     |                                                                                                                                                                                                                                                                                                                                                                                |                                                                       |  |
| 44 |                                                           |     |                                                                                                                                                                                                                                                                                                                                                                                |                                                                       |  |
| 45 |                                                           |     |                                                                                                                                                                                                                                                                                                                                                                                |                                                                       |  |
| 46 |                                                           |     |                                                                                                                                                                                                                                                                                                                                                                                |                                                                       |  |
| 47 |                                                           |     |                                                                                                                                                                                                                                                                                                                                                                                |                                                                       |  |
| 48 |                                                           |     |                                                                                                                                                                                                                                                                                                                                                                                |                                                                       |  |
| 49 |                                                           |     |                                                                                                                                                                                                                                                                                                                                                                                |                                                                       |  |
| 50 |                                                           |     |                                                                                                                                                                                                                                                                                                                                                                                |                                                                       |  |
| 51 |                                                           |     |                                                                                                                                                                                                                                                                                                                                                                                |                                                                       |  |
| 52 |                                                           |     |                                                                                                                                                                                                                                                                                                                                                                                |                                                                       |  |
| 53 |                                                           |     |                                                                                                                                                                                                                                                                                                                                                                                |                                                                       |  |
| 54 |                                                           |     |                                                                                                                                                                                                                                                                                                                                                                                |                                                                       |  |
| 55 |                                                           |     |                                                                                                                                                                                                                                                                                                                                                                                |                                                                       |  |
| 56 |                                                           |     |                                                                                                                                                                                                                                                                                                                                                                                |                                                                       |  |
| 57 |                                                           |     |                                                                                                                                                                                                                                                                                                                                                                                |                                                                       |  |
| 58 |                                                           |     |                                                                                                                                                                                                                                                                                                                                                                                |                                                                       |  |
| 59 |                                                           |     |                                                                                                                                                                                                                                                                                                                                                                                |                                                                       |  |
| 60 |                                                           |     |                                                                                                                                                                                                                                                                                                                                                                                |                                                                       |  |

|    |             |    |                                                      |                    |
|----|-------------|----|------------------------------------------------------|--------------------|
| 1  |             |    |                                                      |                    |
| 2  | Participant | 13 | Time schedule of enrolment, interventions (including | 15-16; study       |
| 3  | timeline    |    | any run-ins and washouts), assessments, and visits   | timeline, Figure 1 |
| 4  |             |    | for participants. A schematic diagram is highly      |                    |
| 5  |             |    | recommended (see Figure)                             |                    |
| 6  |             |    |                                                      |                    |
| 7  | Sample size | 14 | Estimated number of participants needed to achieve   | 27; sample size    |
| 8  |             |    | study objectives and how it was determined,          |                    |
| 9  |             |    | including clinical and statistical assumptions       |                    |
| 10 |             |    | supporting any sample size calculations              |                    |
| 11 |             |    |                                                      |                    |
| 12 |             |    |                                                      |                    |
| 13 | Recruitment | 15 | Strategies for achieving adequate participant        | 12-14;             |
| 14 |             |    | enrolment to reach target sample size                | recruitment and    |
| 15 |             |    |                                                      | screening          |
| 16 |             |    |                                                      |                    |

### Methods: Assignment of interventions (for controlled trials)

#### Allocation:

|    |                |     |                                                          |                 |
|----|----------------|-----|----------------------------------------------------------|-----------------|
| 21 |                |     |                                                          |                 |
| 22 | Sequence       | 16a | Method of generating the allocation sequence (eg,        | 14;             |
| 23 | generation     |     | computer-generated random numbers), and list of          | Randomization,  |
| 24 |                |     | any factors for stratification. To reduce predictability | allocation and  |
| 25 |                |     | of a random sequence, details of any planned             | masking         |
| 26 |                |     | restriction (eg, blocking) should be provided in a       |                 |
| 27 |                |     | separate document that is unavailable to those who       |                 |
| 28 |                |     | enrol participants or assign interventions               |                 |
| 29 |                |     |                                                          |                 |
| 30 |                |     |                                                          |                 |
| 31 | Allocation     | 16b | Mechanism of implementing the allocation sequence -      |                 |
| 32 | concealment    |     | (eg, central telephone; sequentially numbered,           |                 |
| 33 | mechanism      |     | opaque, sealed envelopes), describing any steps to       |                 |
| 34 |                |     | conceal the sequence until interventions are             |                 |
| 35 |                |     | assigned                                                 |                 |
| 36 |                |     |                                                          |                 |
| 37 |                |     |                                                          |                 |
| 38 | Implementation | 16c | Who will generate the allocation sequence, who will      | 15; second      |
| 39 |                |     | enrol participants, and who will assign participants to  | paragraph of    |
| 40 |                |     | interventions                                            | study time line |
| 41 |                |     |                                                          |                 |
| 42 | Blinding       | 17a | Who will be blinded after assignment to interventions    | 14;             |
| 43 | (masking)      |     | (eg, trial participants, care providers, outcome         | Randomization,  |
| 44 |                |     | assessors, data analysts), and how                       | allocation and  |
| 45 |                |     |                                                          | masking, 27;    |
| 46 |                |     |                                                          | statistical     |
| 47 |                |     |                                                          | analyses plan   |
| 48 |                |     |                                                          |                 |
| 49 |                |     |                                                          |                 |
| 50 |                |     |                                                          |                 |
| 51 |                | 17b | If blinded, circumstances under which unblinding is      | -               |
| 52 |                |     | permissible, and procedure for revealing a               |                 |
| 53 |                |     | participant's allocated intervention during the trial    |                 |
| 54 |                |     |                                                          |                 |

### Methods: Data collection, management, and analysis

|    |                            |     |                                                                                                                                                                                                                                                                                                                                                                                                              |                                                                                                                            |
|----|----------------------------|-----|--------------------------------------------------------------------------------------------------------------------------------------------------------------------------------------------------------------------------------------------------------------------------------------------------------------------------------------------------------------------------------------------------------------|----------------------------------------------------------------------------------------------------------------------------|
| 1  |                            |     |                                                                                                                                                                                                                                                                                                                                                                                                              |                                                                                                                            |
| 2  | Data collection            | 18a | Plans for assessment and collection of outcome, baseline, and other trial data, including any related processes to promote data quality (eg, duplicate measurements, training of assessors) and a description of study instruments (eg, questionnaires, laboratory tests) along with their reliability and validity, if known. Reference to where data collection forms can be found, if not in the protocol | 15-16; study timeline, 22-23, intervention fidelity, 23; primary outcome, 23-26; secondary outcomes, 26-27; other measures |
| 3  | methods                    |     |                                                                                                                                                                                                                                                                                                                                                                                                              |                                                                                                                            |
| 4  |                            |     |                                                                                                                                                                                                                                                                                                                                                                                                              |                                                                                                                            |
| 5  |                            |     |                                                                                                                                                                                                                                                                                                                                                                                                              |                                                                                                                            |
| 6  |                            |     |                                                                                                                                                                                                                                                                                                                                                                                                              |                                                                                                                            |
| 7  |                            |     |                                                                                                                                                                                                                                                                                                                                                                                                              |                                                                                                                            |
| 8  |                            |     |                                                                                                                                                                                                                                                                                                                                                                                                              |                                                                                                                            |
| 9  |                            |     |                                                                                                                                                                                                                                                                                                                                                                                                              |                                                                                                                            |
| 10 |                            |     |                                                                                                                                                                                                                                                                                                                                                                                                              |                                                                                                                            |
| 11 |                            |     |                                                                                                                                                                                                                                                                                                                                                                                                              |                                                                                                                            |
| 12 |                            | 18b | Plans to promote participant retention and complete follow-up, including list of any outcome data to be collected for participants who discontinue or deviate from intervention protocols                                                                                                                                                                                                                    | -                                                                                                                          |
| 13 |                            |     |                                                                                                                                                                                                                                                                                                                                                                                                              |                                                                                                                            |
| 14 |                            |     |                                                                                                                                                                                                                                                                                                                                                                                                              |                                                                                                                            |
| 15 |                            |     |                                                                                                                                                                                                                                                                                                                                                                                                              |                                                                                                                            |
| 16 |                            |     |                                                                                                                                                                                                                                                                                                                                                                                                              |                                                                                                                            |
| 17 |                            |     |                                                                                                                                                                                                                                                                                                                                                                                                              |                                                                                                                            |
| 18 | Data                       | 19  | Plans for data entry, coding, security, and storage, including any related processes to promote data quality (eg, double data entry; range checks for data values). Reference to where details of data management procedures can be found, if not in the protocol                                                                                                                                            | 29-30; Data quality assurance and data management                                                                          |
| 19 | management                 |     |                                                                                                                                                                                                                                                                                                                                                                                                              |                                                                                                                            |
| 20 |                            |     |                                                                                                                                                                                                                                                                                                                                                                                                              |                                                                                                                            |
| 21 |                            |     |                                                                                                                                                                                                                                                                                                                                                                                                              |                                                                                                                            |
| 22 |                            |     |                                                                                                                                                                                                                                                                                                                                                                                                              |                                                                                                                            |
| 23 |                            |     |                                                                                                                                                                                                                                                                                                                                                                                                              |                                                                                                                            |
| 24 |                            |     |                                                                                                                                                                                                                                                                                                                                                                                                              |                                                                                                                            |
| 25 |                            |     |                                                                                                                                                                                                                                                                                                                                                                                                              |                                                                                                                            |
| 26 | Statistical                | 20a | Statistical methods for analysing primary and secondary outcomes. Reference to where other details of the statistical analysis plan can be found, if not in the protocol                                                                                                                                                                                                                                     | 27-29; Statistical analyses plan                                                                                           |
| 27 | methods                    |     |                                                                                                                                                                                                                                                                                                                                                                                                              |                                                                                                                            |
| 28 |                            |     |                                                                                                                                                                                                                                                                                                                                                                                                              |                                                                                                                            |
| 29 |                            |     |                                                                                                                                                                                                                                                                                                                                                                                                              |                                                                                                                            |
| 30 |                            |     |                                                                                                                                                                                                                                                                                                                                                                                                              |                                                                                                                            |
| 31 |                            |     |                                                                                                                                                                                                                                                                                                                                                                                                              |                                                                                                                            |
| 32 |                            | 20b | Methods for any additional analyses (eg, subgroup and adjusted analyses)                                                                                                                                                                                                                                                                                                                                     | 27-29; Statistical analyses plan                                                                                           |
| 33 |                            |     |                                                                                                                                                                                                                                                                                                                                                                                                              |                                                                                                                            |
| 34 |                            |     |                                                                                                                                                                                                                                                                                                                                                                                                              |                                                                                                                            |
| 35 |                            | 20c | Definition of analysis population relating to protocol non-adherence (eg, as randomised analysis), and any statistical methods to handle missing data (eg, multiple imputation)                                                                                                                                                                                                                              | 27-29; Statistical analyses plan                                                                                           |
| 36 |                            |     |                                                                                                                                                                                                                                                                                                                                                                                                              |                                                                                                                            |
| 37 |                            |     |                                                                                                                                                                                                                                                                                                                                                                                                              |                                                                                                                            |
| 38 |                            |     |                                                                                                                                                                                                                                                                                                                                                                                                              |                                                                                                                            |
| 39 |                            |     |                                                                                                                                                                                                                                                                                                                                                                                                              |                                                                                                                            |
| 40 |                            |     |                                                                                                                                                                                                                                                                                                                                                                                                              |                                                                                                                            |
| 41 | <b>Methods: Monitoring</b> |     |                                                                                                                                                                                                                                                                                                                                                                                                              |                                                                                                                            |
| 42 |                            |     |                                                                                                                                                                                                                                                                                                                                                                                                              |                                                                                                                            |
| 43 | Data monitoring            | 21a | Composition of data monitoring committee (DMC); summary of its role and reporting structure; statement of whether it is independent from the sponsor and competing interests; and reference to where further details about its charter can be found, if not in the protocol. Alternatively, an explanation of why a DMC is not needed                                                                        | -                                                                                                                          |
| 44 |                            |     |                                                                                                                                                                                                                                                                                                                                                                                                              |                                                                                                                            |
| 45 |                            |     |                                                                                                                                                                                                                                                                                                                                                                                                              |                                                                                                                            |
| 46 |                            |     |                                                                                                                                                                                                                                                                                                                                                                                                              |                                                                                                                            |
| 47 |                            |     |                                                                                                                                                                                                                                                                                                                                                                                                              |                                                                                                                            |
| 48 |                            |     |                                                                                                                                                                                                                                                                                                                                                                                                              |                                                                                                                            |
| 49 |                            |     |                                                                                                                                                                                                                                                                                                                                                                                                              |                                                                                                                            |
| 50 |                            |     |                                                                                                                                                                                                                                                                                                                                                                                                              |                                                                                                                            |
| 51 |                            |     |                                                                                                                                                                                                                                                                                                                                                                                                              |                                                                                                                            |
| 52 |                            | 21b | Description of any interim analyses and stopping guidelines, including who will have access to these interim results and make the final decision to terminate the trial                                                                                                                                                                                                                                      | -                                                                                                                          |
| 53 |                            |     |                                                                                                                                                                                                                                                                                                                                                                                                              |                                                                                                                            |
| 54 |                            |     |                                                                                                                                                                                                                                                                                                                                                                                                              |                                                                                                                            |
| 55 |                            |     |                                                                                                                                                                                                                                                                                                                                                                                                              |                                                                                                                            |
| 56 |                            |     |                                                                                                                                                                                                                                                                                                                                                                                                              |                                                                                                                            |
| 57 |                            |     |                                                                                                                                                                                                                                                                                                                                                                                                              |                                                                                                                            |
| 58 |                            |     |                                                                                                                                                                                                                                                                                                                                                                                                              |                                                                                                                            |
| 59 |                            |     |                                                                                                                                                                                                                                                                                                                                                                                                              |                                                                                                                            |
| 60 |                            |     |                                                                                                                                                                                                                                                                                                                                                                                                              |                                                                                                                            |



|    |                                 |     |                                                                                                                                                                                                                                  |                                                                                       |
|----|---------------------------------|-----|----------------------------------------------------------------------------------------------------------------------------------------------------------------------------------------------------------------------------------|---------------------------------------------------------------------------------------|
| 1  |                                 |     |                                                                                                                                                                                                                                  |                                                                                       |
| 2  | Harms                           | 22  | Plans for collecting, assessing, reporting, and managing solicited and spontaneously reported adverse events and other unintended effects of trial interventions or trial conduct                                                | 29; Participants' safety                                                              |
| 3  |                                 |     |                                                                                                                                                                                                                                  |                                                                                       |
| 4  |                                 |     |                                                                                                                                                                                                                                  |                                                                                       |
| 5  |                                 |     |                                                                                                                                                                                                                                  |                                                                                       |
| 6  |                                 |     |                                                                                                                                                                                                                                  |                                                                                       |
| 7  | Auditing                        | 23  | Frequency and procedures for auditing trial conduct, if any, and whether the process will be independent from investigators and the sponsor                                                                                      | -                                                                                     |
| 8  |                                 |     |                                                                                                                                                                                                                                  |                                                                                       |
| 9  |                                 |     |                                                                                                                                                                                                                                  |                                                                                       |
| 10 |                                 |     |                                                                                                                                                                                                                                  |                                                                                       |
| 11 |                                 |     |                                                                                                                                                                                                                                  |                                                                                       |
| 12 | <b>Ethics and dissemination</b> |     |                                                                                                                                                                                                                                  |                                                                                       |
| 13 |                                 |     |                                                                                                                                                                                                                                  |                                                                                       |
| 14 | Research ethics approval        | 24  | Plans for seeking research ethics committee/institutional review board (REC/IRB) approval                                                                                                                                        | 36; Ethics and dissemination                                                          |
| 15 |                                 |     |                                                                                                                                                                                                                                  |                                                                                       |
| 16 |                                 |     |                                                                                                                                                                                                                                  |                                                                                       |
| 17 |                                 |     |                                                                                                                                                                                                                                  |                                                                                       |
| 18 | Protocol amendments             | 25  | Plans for communicating important protocol modifications (eg, changes to eligibility criteria, outcomes, analyses) to relevant parties (eg, investigators, REC/IRBs, trial participants, trial registries, journals, regulators) | -                                                                                     |
| 19 |                                 |     |                                                                                                                                                                                                                                  |                                                                                       |
| 20 |                                 |     |                                                                                                                                                                                                                                  |                                                                                       |
| 21 |                                 |     |                                                                                                                                                                                                                                  |                                                                                       |
| 22 |                                 |     |                                                                                                                                                                                                                                  |                                                                                       |
| 23 |                                 |     |                                                                                                                                                                                                                                  |                                                                                       |
| 24 |                                 |     |                                                                                                                                                                                                                                  |                                                                                       |
| 25 | Consent or assent               | 26a | Who will obtain informed consent or assent from potential trial participants or authorised surrogates, and how (see Item 32)                                                                                                     | 12-14; recruitment and screening, 15-16; study timeline, 36; Ethics and dissemination |
| 26 |                                 |     |                                                                                                                                                                                                                                  |                                                                                       |
| 27 |                                 |     |                                                                                                                                                                                                                                  |                                                                                       |
| 28 |                                 |     |                                                                                                                                                                                                                                  |                                                                                       |
| 29 |                                 |     |                                                                                                                                                                                                                                  |                                                                                       |
| 30 |                                 |     |                                                                                                                                                                                                                                  |                                                                                       |
| 31 |                                 |     |                                                                                                                                                                                                                                  |                                                                                       |
| 32 |                                 |     |                                                                                                                                                                                                                                  |                                                                                       |
| 33 |                                 |     |                                                                                                                                                                                                                                  |                                                                                       |
| 34 |                                 | 26b | Additional consent provisions for collection and use of participant data and biological specimens in ancillary studies, if applicable                                                                                            | 31-32; Persuasive technology study, 32-33; Microbiota study, 33-34; fMRI study.       |
| 35 |                                 |     |                                                                                                                                                                                                                                  |                                                                                       |
| 36 |                                 |     |                                                                                                                                                                                                                                  |                                                                                       |
| 37 |                                 |     |                                                                                                                                                                                                                                  |                                                                                       |
| 38 |                                 |     |                                                                                                                                                                                                                                  |                                                                                       |
| 39 |                                 |     |                                                                                                                                                                                                                                  |                                                                                       |
| 40 |                                 |     |                                                                                                                                                                                                                                  |                                                                                       |
| 41 |                                 |     |                                                                                                                                                                                                                                  |                                                                                       |
| 42 | Confidentiality                 | 27  | How personal information about potential and enrolled participants will be collected, shared, and maintained in order to protect confidentiality before, during, and after the trial                                             | 29-30; Data quality assurance and data management                                     |
| 43 |                                 |     |                                                                                                                                                                                                                                  |                                                                                       |
| 44 |                                 |     |                                                                                                                                                                                                                                  |                                                                                       |
| 45 |                                 |     |                                                                                                                                                                                                                                  |                                                                                       |
| 46 |                                 |     |                                                                                                                                                                                                                                  |                                                                                       |
| 47 |                                 |     |                                                                                                                                                                                                                                  |                                                                                       |
| 48 |                                 |     |                                                                                                                                                                                                                                  | 50; Consent for publication                                                           |
| 49 |                                 |     |                                                                                                                                                                                                                                  |                                                                                       |
| 50 |                                 |     |                                                                                                                                                                                                                                  |                                                                                       |
| 51 | Declaration of interests        | 28  | Financial and other competing interests for principal investigators for the overall trial and each study site                                                                                                                    | 49; Competing interests                                                               |
| 52 |                                 |     |                                                                                                                                                                                                                                  |                                                                                       |
| 53 |                                 |     |                                                                                                                                                                                                                                  |                                                                                       |
| 54 | Access to data                  | 29  | Statement of who will have access to the final trial dataset, and disclosure of contractual agreements that limit such access for investigators                                                                                  | 50; Availability of data and materials                                                |
| 55 |                                 |     |                                                                                                                                                                                                                                  |                                                                                       |
| 56 |                                 |     |                                                                                                                                                                                                                                  |                                                                                       |
| 57 |                                 |     |                                                                                                                                                                                                                                  |                                                                                       |
| 58 |                                 |     |                                                                                                                                                                                                                                  |                                                                                       |
| 59 |                                 |     |                                                                                                                                                                                                                                  |                                                                                       |
| 60 |                                 |     |                                                                                                                                                                                                                                  |                                                                                       |

|    |                   |     |                                                          |            |
|----|-------------------|-----|----------------------------------------------------------|------------|
| 1  |                   |     |                                                          |            |
| 2  | Ancillary and     | 30  | Provisions, if any, for ancillary and post-trial care,   | N/A        |
| 3  | post-trial care   |     | and for compensation to those who suffer harm from       |            |
| 4  |                   |     | trial participation                                      |            |
| 5  |                   |     |                                                          |            |
| 6  | Dissemination     | 31a | Plans for investigators and sponsor to communicate       | -          |
| 7  | policy            |     | trial results to participants, healthcare professionals, |            |
| 8  |                   |     | the public, and other relevant groups (eg, via           |            |
| 9  |                   |     | publication, reporting in results databases, or other    |            |
| 10 |                   |     | data sharing arrangements), including any                |            |
| 11 |                   |     | publication restrictions                                 |            |
| 12 |                   |     |                                                          |            |
| 13 |                   |     |                                                          |            |
| 14 |                   | 31b | Authorship eligibility guidelines and any intended       | -          |
| 15 |                   |     | use of professional writers                              |            |
| 16 |                   |     |                                                          |            |
| 17 |                   |     |                                                          |            |
| 18 |                   | 31c | Plans, if any, for granting public access to the full    | -          |
| 19 |                   |     | protocol, participant-level dataset, and statistical     |            |
| 20 |                   |     | code                                                     |            |
| 21 |                   |     |                                                          |            |
| 22 | <b>Appendices</b> |     |                                                          |            |
| 23 |                   |     |                                                          |            |
| 24 | Informed consent  | 32  | Model consent form and other related                     | Appendix I |
| 25 | materials         |     | documentation given to participants and authorised       |            |
| 26 |                   |     | surrogates                                               |            |
| 27 |                   |     |                                                          |            |
| 28 |                   |     |                                                          |            |
| 29 | Biological        | 33  | Plans for collection, laboratory evaluation, and         | N/A        |
| 30 | specimens         |     | storage of biological specimens for genetic or           |            |
| 31 |                   |     | molecular analysis in the current trial and for future   |            |
| 32 |                   |     | use in ancillary studies, if applicable                  |            |
| 33 |                   |     |                                                          |            |

\*It is strongly recommended that this checklist be read in conjunction with the SPIRIT 2013 Explanation & Elaboration for important clarification on the items. Amendments to the protocol should be tracked and dated. The SPIRIT checklist is copyrighted by the SPIRIT Group under the Creative Commons "[Attribution-NonCommercial-NoDerivs 3.0 Unported](https://creativecommons.org/licenses/by-nc-nd/3.0/)" license.
